# Supplementary material for: Transcriptome analysis identifies candidate genes in the biosynthetic pathway of sex pheromones from a zygaenid moth, Achelura yunnanensis (Lepidoptera: Zygaenidae)
Source: PeerJ. 2021 Dec 14;9:e12641. doi: 10.7717/peerj.12641 (PMC8679906; doi:10.7717/peerj.12641)
Supplement: Supplemental Information 3 [file peerj-09-12641-s003.xlsx]

## Sheet: Table S2
Gene_id	Length (bp)	FPKM	NCBI blast result			Sequence
			Blast hit	E value	Identity (%)
c80733_g1_i0	246	6934.78	XP_032686856.1 60S ribosomal protein L39 [Odontomachus brunneus]	2e-27	100	TTTTTTTTTTGGGATTTATGTTTTTATTCAGATAACAGCTAGGTCAAAGTAAAAGCTAATTTACAACTTGAGCTTAGTTCTCCTCCAGTGACGCCTTTTAGCATTGTACCGAATAGTGTTTCCTGTACGCATTCGTACCCATTGTGGAATCGGTCGATTTTGTTTTAGCTTTTTGGCAAGTTTGCGCTTTATAATAAACGTCTTGTGGGCCGACATTTTGATCAGCACCGCTGTCAAAACAAAGTG
c71230_g1_i0	1240	6766.4	XP_026751062.1 27 kDa hemolymph protein [Galleria mellonella]	7e-94	59	TTTTATTTCTCATATTGTACTATGAAGGTCCGGTTTTTGTTGATCTACAAATAAAACCAGAAACATTTCTAAGGCATTCTTTTAATATTATAGAAAAAAACTAAGTAATTTTTTTTACATTTGGTATTGTAAATGGCACTTTGATTTCACTGTTCTTAAGTTTCACCGATCGGGATTCCACTTTAGAAGAATTTCTCATCGACTTTGTTGCAAGGAGACTGTTTCCTAATGTAGCGGAACACCGAGTCAGCCATGTTGCCGGGCGTCGGGGACGAGCACTGCTCCAGCGCTGTAACGGCGCATGAGGTCAACTCGTCGTACTTGGCGCATTGTTGTTCGACAGTCAGGTTGTTGGCAGCCTCCATGTCCGGCACGTCTTGGTGCAGCTTGGTGACGCAC…
c35888_g822_i0	3445	6450.82	QLI62130.1 carboxylesterase 18 [Streltzoviella insularis]	2e-150	54	TTTTTTTTTTTTTTTTTTTTTTAAAATTCAATTATTAACATTCACTCCTATAAAATTATTTTAAATATTTGATCCTTTCGTACTAAAATATTTTATTTATTTAAAGATAGAAACCAACCTGGCTCACACCGGTTTGAACTCAGATCATGTAAGATTTTAATGATCGAACAGATCAAAATTTTAAACTTTTGCATTTAAATTTTATCTTAATCCAACATCGAGGTCGCAAACTTTTTTTCTTATTTGAACTAAAAAAAAAAATTACGCTGTTATCCCTAAGGTAATTTTTTCTTTTAATCAAAAATTTTGGATCAATAAACTCACTTATTTATGTCTATAAAAAAAAAAGTTAATTTAATTTTTCTATCACCCCAACAAAATATAAATATAAATTTTAAT…
c50440_g13_i0	823	6421.35	YP_009517341.1 cytochrome c oxidase subunit III [Histia rhodope]	2e-141	88	GAAATCAAATATACTAAATATATTATATAAATAATTAATTTCCCCATCAATAAATTGAAATATAGAGGAATAATCATACTACATCAACAAAATGTCAATATCAGGCTGCTGCTTCAAATCCGAAATGGTGATTTTTGGAGAATTGTAAGTTTAGGTGCCGAATTAAGCATACTAATAAAAAAATTGTTCCAATTATAACATGGAGTCCATGGAATCCTGTTGCTATAAAAAAAGTAGATCCGTAAACACTATCAGCAATGGAAAATGGAGCTTCAATATATTCATATGCTTGGAGAATAGTGAAATAAATTCCTAATATTACTGTGATAAAAAGTCCTTGAGTAGTTTGTGAGTGGTTATTTTCTATAAGGGCATGATGAGCTCATGTTACAGTTACTC…
c55402_g1_i0	3786	6371.61	AHW40461.1 actin, partial [Zygaena filipendulae]	0.0	98	AATTGAATGAAATTTGAAATATACTGTGTTTATACAATGTGTTTATGCCTGCTTTGTTACTGAAAATTCAGGCTTCTAATTTTATCCACAACGAAGTTATAGGGAGTCGAAAATGTTGAAAAGGATGGTCACACCGCTTTTTTTCTCGACTTGGCGGGGACACTGGCGTGCCCCTAGATAAAATAAGTTAAGCATTTCATAAATAATGTTCTCTAATACCGACTCGCGAGTGTTGGACTGTAGACATATGGAACAATGGCAGATATTCAGCGGTACGGTTCTAGAGGCGAGGGGCAGGTCGCGCGTGTCCGTCGTTTGTCTGTACATTGGTATCATGAAATTTGTGCTTCCTGTATGTACCTACTCTACATACAATATGTATATTGACATTAATTATAA…
c62622_g1_i0	2379	4938.71	YP_009110173.1 cytochrome c oxidase subunit I, partial [Rhodopsona rubiginosa]	0.0	89	ATATATATATATATATATATTCGTATCTGTATATAATAAAAGAGAATATTTCCCGTTAATAAATTTACAATTTATCGCTTAAACCTCAGCCATTTTATTAGCGAAAATGACTTTTTTCAACAAATCATAAAGATATTGGAACATTATATTTTATTTTTGGTATTTGATCAGGAATAGTTGGAACTTCCCTTAGATTGCTAATTCGAGCTGAATTAGGAAATCCAGGATCCTTAATTGGAGATGATCAAATTTATAATACAATTGTAACTGCTCATGCATTTATTATAATTTTTTTTATAGTTATACCCATTATAATTGGAGGATTTGGTAATTGATTAGTCCCCCTAATATTGGGAGCTCCAGATATAGCTTTCCCACGAATAAATAATATAAGATTTT…
c66899_g2_i0	260	4634.02	QKK82663.1 chemosensory protein [Histia rhodope]	3e-25	88	TCAGTTACGAATTTTCGATCACTTCGATCACATCAGTCCCCAGATTTCAGTACAACAATGAAGGGCGTTATCGCATTGTGCGTATTGGCGGCAGCGCTCGCAAGCGCTCTACCGCAAAATACGTACACGGACCGGTATGACAACATCAACTTGGACGAGATACTCGGGAACCGCCGCATTCTAGTGCCTTACGTGAAGTGTATGCTCGACCAGGGACCTTGTACTCCAGAGGGAAATGAATTAAGATCACACATTTCTGA
c35888_g354_i0	1189	4613.4	SGZ49395.1 glucocerebrosidase [Zygaena filipendulae]	4e-50	61	GAGAAGCCTTTCCTAACCTGATGAACTTAAACACTGAAGCTTGCGAAGGTTAGATTTTAATATTTACTGACGCGTTCACAAGATTATCTACCTACTGTTTTTAAGTTTATTTGGCATATTTAAATTTTAGGAGCTGCACCAACTGAAACAGTAAAAGTCTTGCTAGGATCATGGACTCGAGCTGAAAATTACATTCACAATATCCTAACCGTAAGTTTCTGTATTATCAACGATTCAGTATTATTATATAACTTTTACACACCCTTGCACACACCATTTATGTTAAATGCAAATCAATTTTATATACAGAATCTGAACTACTTCTTGGTCGGATGGATGGACTGGAACATTGTATTGGACAAAAATGGAGGTCCCACTTTTATCAAAAACTTTGTCGAC…
c80292_g3_i1	1981	4512.52	XP_026741032.1 tropomyosin-1 [Trichoplusia ni]	1e-155	98	TAAAGTTTCAGATGTTATAAATTAATTTTATTGAAAATCGTAAATAAATTTACATAAAATATTAAATAAATAATCATTACATCGCGTGTAGGTAACAGATGTTGTGTTATGTGTGTGTATGTGTGCACCAGAGAGACTGGATGTGTAATGTGTGAGTGTGTGCGTCTAATAACCAGCCAACTCAGCGAAGGTCGAGTCCATCTCGTCCGCCAAACTCTTGTATCTGTCCTTATTGATGCCCAACTCATCTTCGAGCCTGTCGACTTCCTTTTGCAGTTTCTTGACGGTCTTCTCGGCGTATTCGGCGCGGGCTTCAGCTTCCTTCAGTTTGGAGGTTAAAGTTTTCAGTTGCTTTTTAAATTCCTCCACACGTTGGTTGGCTTTCTCTTCCGATACTTC…
c31663_g0_i0	4569	4330.4	XP_028160656.1 vitellogenin-like [Ostrinia furnacalis]	0.0	52	TGAGAAGTCACCTTCTCGCCGACCGATCTTGAGCTAACTGTACTTGAGGGTTGACAACATGAAGATAGTAATTTTAGCGGCGCTTGTCGCTGCTGTCGCATCCGTCCATCTGAGCGGCGAGAGGCAGCCTCAGAATAAACCTCAATGGCCCTGGCAAGTCGGTAATCTATACCGCTACGACGTGGAGACCCGAACTTTGGCTCGCCATGAAGAGGGATCCAGCACAGGGAATGCCTTTAAAGCTCGCTTGATCGTCAGAGCCAAAGCTCCAGGCCAACTGTTAGCTAAGCTTGAAAACCCAAAGCACGCGCAGGTCCACCAAGAGCTTCCAGATGGTTCTCTACCTGATGATCTGGATTACAAGCCTGTTTCGAATTTTGAGCTTCCTTTCGAAATTAA…
c79250_g0_i0	421	4297.14	AYP30835.1 CSP10, partial [Corythucha ciliata]	2e-40	69	AAACTTTTTGCAAAGCTTCATATATCTTACATAATTAATAAAAAAGGAAGGGATTATATACAATATTATTGAACGTTAGAAATAAAGTAGATTGTGTGTACATAATGAAGTTATTGAAAGCTATTTCTGATTCATTCGTGTCCAAAAAGGTGATTTAAGATTGCAGAAATTCTTGAAAAGCTTGTCTATGCTTCCCGTTATTGTCGTACTTGTTTGATAGCTCTGTCCATAAGTCGGGATGCCTCTTCTTTACTTCTTGTGTCAACGTTTTCCCCATATCTTTCTGTTCGTCCGTACATTTGGCGCATTTGGTTGCCAATGCCTCGGGTAACTTATCTTTGATTTCTTGGACAGCTGGAGTGCAGGGGCCTTTGTCTAACAAGCATTTGATGTATGCAA…
c79159_g0_i0	583	4266.25	Uncharacteized protein			GATTTTGCGGTAAATAAAAATATTTATTCAAATAACATTAAGTAGAGTTAACATAAAATTAAAATCGACAGAACAATTTTCCAGGCTTCCCTTGCACGTCCTCGACTTGCTGAGCGAACTGCTCCAACTCGGCTGTGGGCGTGCGGTTCTTCATGTACAAAAGAGGTATCGTCCTCTCTCCGTTCTCGTGCTCGAACGCCGTCTTCTCGTACTGCAAGAAGAAATTGTTATTCAACTTTTTCAGGACCATCTTCTCGTGATCTTCTGGGCAACGGCAGTCGGCGTACAAAATCTCTTCTGCTTTGGAGCCATCGGTGACTATAGAGGCCAAATACAATTGCGAGAGCTCCGGAATTTCCGTATAAGTGGCTCGGACCAGGCCAAAAGTTTTGTCCTTTC…
c81378_g0_i0	1157	4126.55	AWT22254.1 chemosensory protein 3 [Mythimna separata]	9e-28	50	CTCTGCTTAGTCTGGGATCAGATGACTCTGGGTGAGATGTCTCAATATATGATTATTAGGAGTCGAGTCAGTTAATCTTTAAGGTCATTGAAGGCATCATCTATCTAATGTTAATATATAAAAAAATAATTACTGCTATAATTTATCGTTTCAGTAAATTCGTAGTTCATTCTTTGTACATTTTCAATATTCTAGGATTTATATTTGTAATAAAATATCTCAAATCTTCCAAAATATTGCTATGTTTTTTCTAATGACGTCAGGTATTTTTTTATTCAGCAAGTTTGTTCCGCATTTGAACCCGTACACAATTAATTAGCGATCTAAGAAAAATATAGCTGGCTAATCGCGTTTTTTACTGCAAATAATTGAGATTCGGCGAATAATATTATAATAGAT…
c78225_g0_i0	3062	3993.74	ASQ43199.1 HSP22.0 [Choristoneura fumiferana]	8e-92	89	TAGCAACGAGAATTTTTCATCCATTGTTATAATTTCCTCTGAGGCGTAGTGAAACGTACTGATCGCGTCGTGTTTTGATAACGTGACGTTGTTATCTCGGTTGATAAATGAACTCTTTGTTACAAATGGACATTGTTTTGTAGTGAACTCGTTGGGGCGAGGCGCCTCGTCCACTGGCCCGTTTAGTATGATTGTTTCTGCATCGCATTTTACAACCTGCCGCTCAATAAAACTCGTTCGTCCAGGTCTAAACCAGCTAAAACACAAGAGACAAATTTCACTAAGAGATACACAATATGTGAAGTCCTTAAAATATTATTATAATTTAAATGTGATAAAGTTTTATTTCAACGCATCGTGGTTAAAAAAATATAAAATCATTCCTCATAAGTACTTAAT…
c79901_g0_i0	1958	3927.99	XP_037297367.1 muscle-specific protein 20 [Manduca sexta]	1e-116	92	GACAATGGACCGCTCAAATATGTACCGGTAAGAGTTATTTGTGATAATAAAAATAATAAAAAAAATTAATGTAAAAAAGTTTTCATCATAAGATTCCGGAAGATGTACTGGATTCATTTGAGAACGTGGTTGAAGAGGTTTTAAAAACAGAATGATTATTTTTTTTTTTGTTCAAAACAACACAATACGTTTACGCAAGAAGTGATTGATGTTCAGTTCTCCGTTATGTTAAGTTTGTTGTGAACTCAAATAAAACCAAACCTACACCATAGACGAACCGTTCAAAAAACAGAAACTTATAGCGAGATTAATTGATGCTGTGGTCATACAAAAACTGTACTGATAGATACAAATTGCTGGCAATTTTTTTTTTAAACTTGCTGAAAAGACTAAATCTGA…
c50440_g16_i0	296	3813.72	Uncharacteized protein			GATGTTTCCGTTTCCCAATGTGTACAACTTCATTGTTCCAACAAAATTAAGAGGCACAATAGTAGCCAAAATTACAATAATATGGAACACATTGACATCCTGTGTATCCACCTGTGTTTCCACCACTGCAACCACCTTGACCACCTTGAAATCCACCGAATCCACCGTTGTTTACAGTCGGTCCTTGACTCACTTGACCACCAACGTTCCCATTGGTGTCATCACCAAGTACATTATCCAACAATGACAAAGAGCCATCGTTGCCACCAATGAGATTGTCAAGGAGAGGGGAACAC
c63479_g0_i0	1390	3507.16	KOB64891.1 putative cuticle protein [Operophtera brumata]	7e-27	82	TTATTTATTTAAAAAGGTATAGAAAAAACACATGACTTATGGCACGATGGGAAATCGATGTGTTAGTTATGCTTATTCGGATAATACAACTGATATCGCTCTATTCTTTGCAACACTTTCCTTAACTAAACTAAAACAATGAAAACAAATGCCGTTTCTTTTCTTACTTTACATATATACTAGGGTAAGAAAAGGACAGCTATCGTTTTAGATATGTCAATTTTAGTGAATGAGAATATTACACAGAATAGGTGCCAGTGTTAACTTTATTCGGAACAGTTTTGTACAGAGTGTTAATGGCGGAATATTTACATTGGCGTTAACTATGTTTACTTCTTCTCTCCGAGGGATGTTTTTGGTTGGTATCCTTGGGGTCCAGCGGTGAATGTCACTGTGTAG…
c57717_g6_i1	1728	3370.02	XP_012547454.1 myofilin isoform X7 [Bombyx mori]	5e-62	94	TAAAGAAGTATAACTTCAAAAAAACAGTTTTAAACTTTTATTATCGATATAAAAACACATAACTTGTTCTTACTACGGTGCAAAACTAATCATGAGTTCCCGATATTTTGACTGTATTACAATCACTATGCTTGCGGGAGGATATTGCAATACCGTCGAATATTCAGAAAAAAAGAAGATAAGGCGTTAAATTCAGTTTTTGCTGCCGTAAAGTTTATATAATAGTGAATTTTGTCCAAATTTAAATTTCGTATAGTCACGTAGTGTGTTGTATGTTCATGTGATGTTAAATCGAATTCGGCTCAACAAACTCTTCGAGCTGTCGACAGGCTCCACAGTATTTTTTTTTTTTTTCAAATCAATATTTTATTTATAAAATCTATTACAAACTTGATAATC…
c77140_g2_i0	2797	3294.94	XP_028172166.1 troponin T, skeletal muscle [Ostrinia furnacalis]	5e-169	96	GTGCAAATAAAAATATATATAATATTTCAAGCGTATTTATTTTGATGTTAAGTTGAGACGGTGAGTTTAATGCGAGTTTCATAATTATAATTATGTAATAGAATCGAGCGAGTAACTTTTTTTAAATTTCTTTCCATTTATTATTTACCTGACAACGATCGGTCGAGACAAGGACAACAGTGACGTGGAATGACGTCGATCGGTCATGTCAAGGACAAAGAAGAAGCACACGACTAGCGGCAGGCGGGAACTAGCCGTGTCATTGTCGGCTTGTCCTTGACTTGGTCGATCGATGTGAAGTAAGTATACATTCTAGTTTCCTCATTAATTGAAAATTTAATAATTAATTTATAATATTGTCAGAGAATGGGAACTAATAACATTGTTATTGGTGATTTA…
c63433_g1_i0	1851	2866.94	XP_039756174.1 troponin C [Pararge aegeria]	1e-94	98	TAGCTTTGTTTGTACGAATAATGAAGTCTTTCAACCTCTATTATAAGATTGGCTTACTAAAAGTATTGTAATACTATGGAAAAGAGAAGAAGTGTTTAATCTCCAGTCATCATCTCCATGAATTCATCGAAGTCGACGGTCCCGGAGCCATCTGTGTCGATTTCAGCGATGATGCCGTCGAGATCAGAGTTGCTTAGTTTGTCATCTAGAGCAGCTAAAATTTCCTTAAGTGTAGATGTGGTGATGTACCCATTGCCTTCACGGTCGTATAACCTGAAAGCTTCTTTCAGTTCTTGTTGCATTGCTTCCGCATCCTCCTCTTCTAAGAAGTGGGAGGCGATTGCGCAGAATCCATCGAAGTTAATTTTTCCAGAGTTTTCTGGGTCATTTTCATCAATG…
c83758_g0_i0	3681	2670.4	XP_028033142.1 heat shock 70 kDa protein cognate 4 [Bombyx mandarina]	0.0	98	ATTTAATTGAAAAATGAGAGTGACAGAAAAATTTTACTTGTCGATACAAATGACATCACTAAAATTCGACAGATGTTTTCTAGAAGACGCATAACGTCACCTATTTAACCAATGGTAGTGAAGTTTGAATCCATGATTCTGTTCTGATTGGTCGACGTTAGCGGAAGTTTCCAGAATATCCCAGTGACGTCGAGTACCTACCTCTACACAGCAATATAAACTTCCAACATTAATCCGCCATTTTATTTGAGAAATAGAAGCCGTCAATCGCGCACGTTCGCTGAGATTTCAGCCAAGTAGTTAAGTCCACGACAAAAGAAACAGACTGATTAGTGTTAATTTATAGAAAAAATGGCAAAGGCACCAGCAGTAGGCATCGACTTGGGCACCACGTACTCT…
c55062_g0_i1	1543	2632.86	AEL28888.1 ribosomal protein L29 [Heliconius melpomene cythera]	2e-12	90	GGAACCGTAGGTTAGTTTTATGTTTACTTTATTGTTCCAAAAAATATTACTGTAATCTTGCTTCAATTATTAAGATTGAATTAAATATTTTATTTATTATAGCTTATTGTTTATAGTAACAAACATATTTTTATTTTCAGAATTGTGAACTTATCGAAATGGCAAAGTCAAAGAACCATACAAATCATAACCAAAGTAAGACCTACGATAAATTATCCAATTAGTTATTTCAATTTTTTTTATATTCAGCGTCGCTTAACACTTTGTTCAAGTGGTTTTTAAACAATCATACAATCAGAGAGCTGTTTTAGGCAGGGAAATTAATATGTAACGTTAAGGATTACTTGTTTTTATTAACTCGATTTTCTTGTTTTTCAGATCGCAAAGCCCACAGAAATG…
c60411_g0_i0	277	2520.65	XP_035447193.1 60S ribosomal protein L36-like [Spodoptera frugiperda]	2e-50	93	GGGCACGCTTATCCTTAGATACCTTAAGCAATTCCATTGCTCGTTTCTCATACTGAGCATGACCAACAACTTCACGGACCAAGTCTCTTACGAATTTTGAGTGTTTAGTTTGAAGACCCTTTAACCTAGCTGGCCTGACTTTAATGGTCTTATCTGTAATTCCTTTCTTTCCAGCTGAAATCTTTGTCGTTTTGTGGCCTTTACGAAGGCCAACAGCCATTTCAAATCGCGGAGCCATGATTTCGGTTTGACAGACCCGAAAGTGAGAGAATTTTTT
c81595_g0_i3	1473	2513.85	XP_037969408.1 circadian clock-controlled protein daywake-like [Plutella xylostella]	1e-76	57	ACCACGGGCTCTACGATCTTGGCGACGATTGGATCAGCTAATTGCGACATCACTTCTTGCCAGTTGTTGTTCAGAAACTCTTCTACGGGATCCCCTGTTACAAAAATAGCGTCATACAAAATAGCGTCTAGGTTTAAAAGCACGCCTTTAATATTTATAAATCGATTTTGTTTAATCCAATTTTTAATTCATTGGCGTTATACACTTCGTTTGCTTAAAAAAAAAAAAATATTTTTTAGTGAACTTTTTAAGTTACAGTTAGGTAGATAATAAATAATCTGTCACACCGTATACTAATTTTTTTTCTATAAAGTTTAGAATCTGTACATAAGTACTACTTCATAAGATTATATGATTGATCCTTTGAAAACTCACTAAGCATAGGCACTCAACAAAACG…
c70243_g0_i0	1492	2465.23	ADL09420.1 myosin light chain 2 [Antheraea pernyi]	4e-106	98	TCCGAGTTACAACATTTATATTGATGCTTATAAAACCAAAAATCTAATTACCTACTTACATGTATGAAATATATCAGTAAAATTATTTGCCTAATTTTTCAAAAGCAGTAGTTAGTACTTTGTAGATTAACTTAGACCCGAGGGCGCTAATCAGTCATGACATGGTCGGTCTCTGCTCCGGTGTGCGGTGTTGCGGTTTATGTTAGATTCGAGTTTTGACTGTAGAATCTTGATTTGTATACATTAACGATTGGGTATGTTCATAGGTATTATTGTTTACGTATCTATGGTATGACACACTGGCGCCGTGTGGAACATGTACTTATATATCTGTGTGTTATTGTGAAGCTGTATTTAAAAATAGATTATATATTTTTTAATATTATATTTGTTTGATGT…
c35888_g569_i0	2337	2315.01	XP_013185735.1 PREDICTED: muscle LIM protein Mlp84B-like isoform X1 [Amyelois transitella]	0.0	93	CTCGGCAGTACCGCCCTGCACACTTCCCGCGCCCGAGAGTTCGACTCTCGTTCCGACTCGACGAACAGGATAAGTTAAGCGAGCACAATGCCTTTCAAACCAGCAGATAACCCGAAGTGTCCGAAATGCGGCAAGTCCGTGTACGCGGCGGAAGAACGAGTAGCCGGCGGGCTCAAATGGCACAAAATGTGCTTCAAGTGCGGCTTGTGCCAGAAGCTGCTGGATTCCACCAACTGCTCAGAACACGAAGGGGAACTGTTCTGCAAAATGTGCCACGCGCGCAAGTTCGGTCCTAAAGGCTACGGTTTTGGCGGTGGCGCTGGCTGTCTTTCCATGGACAGCGGTGAACATCTGAAGAACGAGCCGGGAGCAAGAACCAATGGAGCGATGTTGGAACCA…
c69532_g0_i0	478	2300.73	KPJ19955.1 60S ribosomal protein L27 [Papilio machaon]	4e-92	97	TTTTTTTTTATAATTTTTAAATTTTATTTAGTTACACCTTAGAACCTAAGCTTCTGGAAGAACCATTTGTTCTTTCCACTCTTGTATCTCTCTTCAAAACGAACTCTCGTGTTGAAGCGCAGCTTCTTCCGCTTGGCAGGATCTTTCAGGTCCTTTGCACTGAACTTTTCAAAGCTGAAATCAGCTGAGTAACGTGTGGGCATCAAGTGATTGTAGTTCACTACCTTTACGAAGGGCTTTATTTTGGAACGCTTGTGAATTTTGTTTTTGCCCATCCTTTTGTGAACTTTGCGTGGATACCTCTCGATGCCGGCGACGAAAGCGTGCCCGTACGGCTTGTCTGACGTGCCCTCGTCGTAGTTCTTCACTACGATGGCCTTGCGGCCCGCGTACCGGCCA…
c83873_g1_i0	4959	2266.22	XP_030040276.1 paramyosin, long form isoform X1 [Manduca sexta]	0.0	95	GGGGGGGCGGCGGGGGGCGTGGGGATTGGGGCGGGGGGCGCAGGGCGCGGGGTGGTGGGGTGCACCTTCACGGCCGGTGCGCTAGCGACGCTCGCACGCGCTCTCACTAGTCGAACGGTGCCCGACCGGTAACGTAGCGCCGACCGCCGACCGAGAGACGACCAGCGACCATGTCTGCCGTGGCGAAGACTTCCAAGTACACGTACCGCAGCAGCGGCGGTGGCACCACCGACGTCAACATCGAGTACAGCGCCGACCTGAGTGCTCTCTCCAGGCTGGAGGACAAGATTCGACTCCTCCAAGATGATCTGGAATCCGAAAGGGAGCTGCGTCAGAGGGTAAGCTGAAAGTGCGCGAAATGTGATATGAGCGAGCGGGGCGGCCATAGCGGGCGCGGCC…
c41762_g0_i0	462	2219.02	XP_039756198.1 60S ribosomal protein L34-like [Pararge aegeria]	3e-65	98	TTTTTTTTTTTTTTTTTTTTTTACGTTTTTATATTTTTATTTACACCTTAACAAAAGTTCACTTTGCGGCTTTCTTTACGCTTTTAACACCAACTTGCTGCGCTTTGAGGACCTTTACTATTTTCTGTTCCTCAATAAGAAATGCTCTGATGATCCTTTGTTTTACACACTTGTGGCAGAGAACACCTCCATACGCACGCTTGACAGTCTTCTTGCGGTAGCAAAGGCGTGAGCGCTCCGCAGGCCTGGCCGGCTGGATACCCCGCAGCTTGCTCTTGCACTGGCCACATCTTGGGATCTTCTTAGGTTTCTTTACATATTGGTATACCAATCGACCACCGGGAGTTCTTACTATTCTCCTTTGATTAGATTTGGTGTTGTACGACAAACGTCGTCTAA…
c57595_g0_i0	534	2088.62	NP_001037269.1 ribosomal protein S18 [Bombyx mori]	1e-90	99	GTTGCTTTATTTTCTTTATTTATTTATCAAATTACTTCTTCTTGGACACACCCACAGTCCTTCCTCGCCTGCCTGTGGTCTTGGTATGCTGACCTCGTACACGTAGGCCCCAGTAGTGTCGCATGCCTCTGTGAGCACGAATTTTCTTTAATCTCTCCAGGTCTTCACGGAGTTTCGAATCCAAGTTGGAGGAAGTAAGCTGGCTAAACTTGCCATCGACTATATCTTTCTGTCTGTTCAAGAACCAGTCTGGAATCTTATATTGCCTTGGGTTTGACATAATTGTTATTATTTTCTCAACCTCTTCCTCGGTGCATTCCCCTGCACGTTTATCCAGATCAATGTCGGCTTTTTTCAAAACTATGTTTGAATAACGACGACCAACTCCTTTGATGGCAG…
c53418_g0_i2	1564	2061.35	GBP67389.1 Myophilin [Eumeta japonica]	4e-110	95	CAAATTTTGCATGTCACCTGAAATTGATCAATGGTAGAAAACAGCTGCGTGGTGGGTGACGCCCGCCTACAGACGCCAGAGCTGGGCGGGCGCCGATCGTAGGCTCAGTCTTTCAGTTGGTACCGCCGCGAAAGCTCGCCCCACAAGTGATTAAGGTTTTGTGGATACACAAAGAAAAATGGCCGTATGTACACATACCTTTCTTTTTGTCATTTGAATGCACTTTTATTCATAAAATGTGTTTTATAAACTTTAGTTTAATTATTTAATATTTTCTCATTATTCATTAAATTATCAAAGTGTCACCAAAACAATTTGTCATGGGCTTAAGAAGTTAATTATTTTTCAATCACCAAACACTGACGTCAGTGGAATCAGCGTTTGTATTATAATAGCAAC…
c50440_g14_i0	1606	2012.39	Uncharacteized protein			TTAAAACTTTCAACATTTATTGCATAACAACAACTAACAACAGACTTCAACTAAGTATTTGTAAATCAGGAAAATTTAAGAAACCATTTTTAGTCACGTTTTATGAATTATTATTAAAATATTGATTACCAGCGATGTTTCCGTTTCCCAATGTTCAACAACTTCATTGTTCCAACAAAATTAAGAGGCACAATTGTAGCCACGATTACAATAATATGGAGCACATTGACATCCTGTGTAGCCACCGAAGGGCGGATATCCACCACAGTTGTATCCGCTGTTATAATATTGACCACCTTGACATCCTGTGTATCCACCTGTGTTTCCACCACTGCAACCACCTTGACCACCTTGAAATCCACCGAATCCACCGTTGTTTACAGTCGGTCCTTGACTCAC…
c46374_g0_i0	673	1961.6	XP_022822828.1 40S ribosomal protein S8 [Spodoptera litura]	2e-141	95	AGCAAAGATGGGTATAAGTCGTGATCACTGGCATAAACGACGTGCTACGGGTGGCAAACGAGCTCCCATTCGCAAGAAGAGGAAATATGAGTTAGGTCGCCCGGCTGCCAACACCAAGCTTGGTCCTCAGCGCATTCACTCTGTGCGCTCCCGTGGTGGGAATACAAAGTATCGTGCGCTGCGTCTTGATACTGGAAACTTTTCTTGGGGATCAGAATGCACTACCCGAAAGACTCGTATCATTGATGTCGTTTACAATGCATCCAATAATGAGTTAGTACGTACTAAGACCCTTGTGAAAAATGCTATTGTGGTAGTTGATGCTACACCATTCAGACAATGGTACGAGTCTCACTACATTCTGCCTCTAGGAAGAAAGAAGGGAGCTAAGTTGACTGA…
c58059_g5_i0	7666	1929.94	XP_013164270.1 PREDICTED: myosin heavy chain, muscle isoform X3 [Papilio xuthus]	0.0	96	TACCAGGGACATCACATGCGCGTTACCGATCCTTTAAAAAGCTATTTACTCCCTTCGAAATATTGTTTTCTATAAGATTTATGTAGAGGAAAGCCTTTTTGCATCGTTGACTCATCAACGCAGAGAGCACCCAAGCTGGAAATACAAAATTGAGATAGTAAGTTAGTTTTATGGCCTAAGCAATAACAATTTTAGGTAATTTAATATGCAAGGGCGTTTAATTGATGAGGTGAGTGAAAAACATTGTCTATAGTGAAATGTTTATGCTTTGATTCTTTAATAGAAATATTGATACCCGTTCAACAGAATGTACCAGAAGTCGTCGGATAAGTGTGTAAGATACGGTTTGGAAGTAGTTAGGGTTCGTTCTTAAACAAAAATTCAATATATTCACAAGGC…
c44035_g0_i0	1016	1918.04	NP_001037038.1 heat shock protein 20.4 [Bombyx mori]	5e-86	72	TGGCGATTAATCGGTATTCGACTAATAAACACAGAATGTTAAAGTTATATTTATTTTTAATTAAAAAAAAACAGTTACAAATTACACAACGTTATTATCATTACACTGTTTTCAGTCTGATCGAATAATAGAACTTAAACCTAATAAACAACTATTTGTTAAAAGCCGTTGTTAATCGCCGGGTCTTAGAGATATATTTATTCACTTTTCCTTCTCCTCCACAGATACATCATTTCCTTCATCCTTAATTTCCTTTCGAACTGGCCCTGTTTGTGTTATTGGTACCTTCCTCTCGCCTTTCACTTCGGAGGTCTTCCTTGGAGCAGTGACAGTCAAGACCCCGTCTGAAGACAGCTGCGACTCCACACTATCGCCCAAAGCGTCGTCTGGCAACGCGTA…
c70364_g0_i0	928	1913.18	QYI89891.1 ribosomal protein L7A [Tuta absoluta]	5e-141	96	GTTCTTTTTATTTCGGCCATATTTGCCGAAAGTTTGATCGTTCTTTTGGGTCACGTATCCGATCGTGATCAGCAAATCGCATATATAAAAATTAATCAAGATGGTGCAGAAGAAGCCTAAAAAGAAGGTTGGCAAGAAGGTGGCAGCCGCTCCCTTGGTCGTCAAAAAGTCTGAACCGAAAAAGATAGTGAACCCGCTCTTTGAGAAGAGGCCCAAGAATTTCGCTATTGGTCAGGACATCCAGCCGACCCGTGACCTATCTCGGTTTGTCCGCTGGCCCAAGTACATCCGCATCCAGCGGCAGAAGGCGGTACTCCAGCGCCGTCTCAAGGTGCCCCCGCCGATCAACCAGTTTACACAGACACTTGACAAGACCACAGCCAAAGGCTTATTTAAGAT…
c73034_g0_i0	717	1887.59	XP_023951388.1 40S ribosomal protein S27 isoform X1 [Bicyclus anynana]	2e-52	91	AAACGCTGTAACCATGCCGGTGTGTATTTTAATTATAAACTATTGCTTAGTCTACTAATATATCTAGATTTTAAAAGTTACATAAGCGTAACCCTTTTTTAAATCGTTTTAATGTGCTAGTTTGATTCCAATCGAAATCTATTTATGTTGAAATTGCGCATAATGGTTTGAGATACACATGGCAGCATTTGACATTTCGAACACAACACGACAAATTATTGTGATATAATTTGTTAATTTTCAGAGTTTCATGGAAATACACATCTCGCAGTGGACTTATTGCACCCATCGCCAGCTTCCGAGAGAAGGAAACACAAGCTCAAAAGGCTTGTGCCACATCCTAATTCATATTTTATGGATGTAAAGTGTCCTGGTTGTTACAAAATAACAACTGTATTC…
c35888_g599_i1	4876	1816.17	AAQ57129.1 endonuclease and reverse transcriptase-like protein [Bombyx mori]	0.0	69	GAAGAACCCCATGCTGTATTCCCCTGGGAAAACCTCGGCAGGGAGCTCATTCCACAATCGAAGCGTACGCGGGAGGAAATTCCTCTGGAACCGCACTGTACGAGACCAGTTTGGCTTCAGCGTGTGAGGATGAATACCCTGCCGATGGCGAGTGGTGCGATGATAAAATGTGGCTGTTGGCATCATGTCAAATAATTCTTCGGAACACAACCCGTTGTACAAGCGATAGAACACACATAAAGAGGCAAAGTCTCTCCTCAGACTTAGTGGTTCAATACCGCCAGTGAGCTTAGGATCATCAACGATTCGCACAGCGCGTCTTTGGACCGAGTCAAAGGGCTCAAGCTGGTATCCAGGTGCTCCCGCCCACAGATGACAGCAGTACTCCATATGGGGCCT…
c60302_g0_i0	585	1788.37	XP_034837920.1 60S ribosomal protein L32 [Maniola hyperantus]	2e-90	99	GCCATCTGTTTTTAATAGAATTGGAAAGAAATTGCAGGTTCATCATTCTATTTATTTTAAACATTTAATACGACATAAAATAAAACAAGAATATATCGTAAAATATGTATTTTTTATTCATTCTCCTGGCTACGTAATCTGGCCGCCGCATTGGTCACCCTGATGCTGAGCTGGTGCGCGCGCTCCACGATCGTCTTCCGTTTCTTGGAGGAGACACCATGGGCGATCTCTGCGCAGTACTTCCTGTTTTGCATCATGAGGATTTCCAGCTCACGGACGTTGTGTACTAATACCTTACGGAACCCATTGGGCAGCATGTGGCGTGTCTTCTTATTGCTACCGTATCCAATGCTTGGCATCAAGTACTGGCCCTTGAATCGACGACGTACCCTGTTGTCG…
c61844_g0_i0	851	1777.62	AFM73649.1 heat shock protein 70, partial [Bicyclus anynana]	2e-106	92	TTTTTTTTTTGTTGCAACACTGCACCCAACCATCGTACTTTCGTCTCCTTTCTAGAACATTTTAACGCTATTGGCCATTGGGGCCTGACGTTCGAGAATACTCGGTGCAACTCGCGCCCTGATTGGTTGTTCCAGAAATGGGTAGCACGTTCTGGGCATTGATTCGCCGAGTATAAAAGGCTCGCGGCGAGCGCGGTATGTCAGATTAACATTTGAATCTGAACGAATACAAGTGACATAAGAGTTTCGGTGAAACCGGAGATATTTTACTACAAGAAGATTGAAGTTAATACAACGATTTTTGGGAAGGCATTATTATCAAGCAGTATTTGCAAGAGATTTGTTTGTTTATAAATTTACCAAAAATAATACAAAATGACAGCTATTGGAATTGATCTT…
c29429_g4_i0	3724	1737.59	XP_014370417.1 PREDICTED: calcium-transporting ATPase sarcoplasmic/endoplasmic reticulum type isoform X2 [Papilio machaon]	0.0	97	TTTTAAATATTTATCGTTTATTGTACAAAACAATAATACATTAAAATGTACACGTATGTTTAAATTTTTGGACTCGATGACGTCCCAAAAACTGGACAACAAATGATCCCTCCCTTACAGACACCATATTGCTCGTCGAGGTGTCAGCACTAATAGACGAACATTCTTAGCTCTAAGTAAGCAAACTAGATTAAAATATAATAAAAATATAACAATTAAATTAATACGAGTGCTGTCAACTTAAGTACTCATTGTCTATCGCACTGGTTCTGTCGACGGGCACATGTACTCATATAAATAGAACAACGTAATGTAACAATTGATAAACCTAAGCATACTGTATACTGCGAGCGTGTACGTCATGAACATGTCCTCGATGGGTGGCGTAGGCCGCGCCTC…
c29429_g3_i0	1441	1728.69	XP_026496607.1 C3 and PZP-like alpha-2-macroglobulin domain-containing protein 8 isoform X2 [Vanessa tameamea]	4e-160	77	GATATTTTGTTTTTAAAATGTACAAAATACCAAAGTTCAAAATGCGCATAAACAGATATATTGTGACATTACATAATCGAGCACTATCCACTGTGCCTATGATTACCTATGATGACGTGTGTTGGAGGAAACGCTCGGGGCACCGCCCGGCTCACGGCTGCGGCCGCCGTCAGTACGAGTCGGGCCAGTGCACCGTCGACACCTTCACTTTCCAGCAACTGCCACTAAAACTTCTCCACAATGGCTCACCTGATTGATGTAGCAACCGATGACCGTCTGCAATATCAGTTTTTCCCGGTCGCCAGCGGTTCAGTGCAGTTCAAAGTGCGTGCCTCTAACGATGCGCATCTTGCACTCACCACGGGCTCCCAGGAGTCCGACCCGATGTACGAGGTATTC…
c57238_g3_i0	943	1644.28	XP_026501519.1 60S ribosomal protein L10 [Vanessa tameamea]	1e-154	91	GAAAGCGCGGGATGATTTTTGATATTGATATTTATATAATGATTCTACTTTCTCCAATATCTATCAATGAAACTTTTAGAACAATAAATAAATAACAATAAATTGACATCAAATATCCCACAATTTTACGTTGACATGATTTTTTTATTATTAAATAGGCATTTTTGTTTTTTTTTTTTTTATGTTTAAAAATTTATTAGTTCACAGCACATTACACACTGTAAATGTCAGTTTGGACTTTTCTCCATGCATCTAGGGGTCCATGCAGAGGACGGTACTGGACATTGCAGCCGTCATTAGCAAGGCGACCCTCCTCACGTAGCTTTTCAAACTCATCACGGTCATACTTGGTGAATCCCCATCTCTTAGATACATAGATCTTCTGGCGTCCAGGGAACT…
c80543_g2_i0	646	1594.77	Uncharacteized protein			TATTATTATAGGCTATATATATTTTTTAAATAATATAATTAGGTAAATAATGTTTTAATTATTGTATACTGTTATTTTATTGTAAATTATAGATAGTACAGCCATTCTTATGCTTTCTATTGCCAGTTACTCTGTACTTGCTGCATCCCTTCATGCATTTAATATAGTGTGAAAATGAGATTGATGTAAGATATCTATATAAGTAAAATATATATATATCTTTGAATGTATATTGCTTCTAGTAACTTTCTTATTAAATAGTTGTCCTATTTTTCAACATTTATATTATGTTTGACCCTATTATATACCTTATACTCTAAATTTATATTTGACCCTATTTTCCTATGTGGGAAATATAAAATGGTACAAATGGGCATTTAAACATACTATATGCTGCAA…
c82897_g1_i0	682	1586.51	XP_041973042.1 60S ribosomal protein L27a [Aricia agestis]	1e-78	99	GATTATTGTTCAATTATATAATTTATGTAATGTGTAATTAGCACCCAATATATTATTTACCGCTTCAACATCAAACTTAAGTGGTATGCCAGTGTTGCTAGATACAAAATATATCTTCTACAATTTAGTGAGTTGGTGGAAATTTATTTTGTGTATCTGGCAACACAGCCTTCCTTTCTTGTGAAGTTTGACGTTGAAGCTGTAAAAATGGCCACCTCTAAGAAGAAGACCAGGAAGTTAAGAGGACACGTGAGCCATGGTCATGGACGTATCGGCAAGCACCGCAAGCACCCTGGCGGTCGCGGTAACGCCGGTGGGGAGCACCACCACAGAATTAATATGGACAAATACCATCCAGGATACTTTGGCAAGTTGGGCATGAGAAATTTCCACTTAAGG…
c60610_g0_i0	844	1563.85	QCY53842.1 ribosomal protein S3 [Dioryctria abietella]	2e-167	100	TGCAGTTTCTGAACGAATTATTACTGTCAAATTGACATTGACGTTTGAAAAGTTCTTTCCGGTCTTTTAGAATTTCACAGCTCCTTTTTGCAATCATGGCGGTGGCCAATATATCAAAGAAGCGAAAATTCGTCGGCGATGGAGTGTTCAAGGCGGAACTCAACGAGTTCCTCACCAGGGAGTTGGCGGAAGATGGATATTCAGGTGTTGAGGTGCGCGTAACGCCTACTCGTTCGGAGATCATAATAATGGCAACGAGGACACAAAGTGTGTTGGGCGAGAAAGGTCGTAGGATCCGCGAGCTCACGTCGGTCGTGCAGAAGCGGTTCAACATTCCTGAACAGTCTGTCGAGCTGTACGCAGAGAAGGTTGCCACACGCGGGCTCTGCGCCATCGCAC…
c82375_g1_i1	2129	1517.3	AGC23337.1 heat shock protein 19.8 [Chilo suppressalis]	8e-98	87	TGGAAATCCGCGTTCAGTCTTCAGTTGCAAACTAGTGACAGCGCAAGTAACAAGTGAAGACTGAACGCGGATTTCCAACAAGAAGCAAGCTTGAAGCTACGAAGTTCTTTACCCTGAAAATAATTAACACGACACCGTTATTTTGAAGAAAGAAAAATGTCTCTGCTTCCATTCTTGTTCGATTACGAGATTGAACGCCCTCGCCGGCTGTTCGACCAGCACTTCGGCTTGGCCTTGACTCCAGACGACTTGTTGACCGCAGCTGCTGGACCTCTGATGAGCCGGGAGTACTACCGCCCTTGGCGGCACCTAGCTGCCTCTGCCAGAGACGTGGGATCCAGCATCAAGTCCGACAAAGACAAGTTCCAGGTAAATTTGGATGTGCAGCATTTCACGCCA…
c66442_g2_i0	1267	1515.31	NP_001298359.1 translationally-controlled tumor protein homolog [Papilio polytes]	2e-112	95	CTTAGGCCCTTTCCGGTTTAGCTTTTGGGGCTGGTAGCCGTAGTTTCGGTTTTTATTATTTTAATCACATTTAATCTGGCGAAATGAGAATCTACAAGGATATTATTACTGGTGACGAGATGTTCTCGGACACTTATAGAATGAAACTAGTTGACGAAGTTATTTACGAAGTCACTGGTAAATTAGTGTCCAGAGCGCAGGGCGATATTAAAATAGAAGGCTTCAATCCCTCGGCAGAGGAAGCCGACGAAGGCACAGACTCCAATGTGGAATCTGGGGTGGACATTGTTCTAAATCACAGATTAGTGGAGTCATACGCTTTCGGTGACAAAAAATCGTACACCCTTTATCTCAAAGACTATATGAAAAAATTAGTAGCAAAATTGGAAGAGAAAGCAC…
c74856_g4_i1	985	1502.59	XP_013200735.1 PREDICTED: extensin isoform X3 [Amyelois transitella]	3e-55	68	GCGGTTGCTGGGTGTTCTGCGGTTGCTGGGTGTACTGCGGCTCCCTGCCGTAGCCCTGCGGAGAGAGGGGTGCCGGGACAGGGGCCCAGCGGCTCTGCTGCTGACGGTACGGCTGCGCGCCAGGAGACAGCGGCCCCTGGCGGTAGGAGGGCGACACGCTCGCGCCCGGTCCGACCGGAATCAGTTTACTTAGACCGGTCGCTTCCTGCCGCCTGCCTTCTGCTGCTTGCTGTTGCTGAGCCTGTTGCTGATACTGGGGCTGATACTGGGGCTGATACTGGGGTTGGTACTGAGGTTGATTCTGGTGCTGCTCGGGCTGGTATTGGGGCTGGGGGTCGTAGTGGGGATGATTCTGGTATTGAGGCTGTTGCTGCGCCGGTATCTGCTGTTGTTGTGGAG…
c81421_g0_i0	1438	1460.57	XP_037964213.1 protein takeout-like [Plutella xylostella]	8e-117	65	GTTTTAATCTTGTTTATTATTCTTATTATAAAACTAAATAAGGTAAAACTGTTGTGTGATATTTTATGGTTTCGGCAGGAGATCGTCTAAGGGGTAGGTGTCTGCGATTTTATTGGCGGTGTCCAGGAGCAGCGCAGAGACGGTCCTCTCCACGTACGGCTTTGACGCCTTCAAGAACTCACCCCGGTTCTGGTTGATAGCCTGGTTAGCTGTCTCCCCGAGAGCCTTATCTCCGTTGAAGAGCCCGTCGAGCCTCAAGGAGTAATCCTTCACGTCTATGTCCATGTCTAAAGTGGAGAAATGAAGGTATTCAGCCCCATCGCGGTTCAACACTTCGCCGTGAAGAGTTACTTCCGCCAAGCATTTTACAGCGTCAGCGGTGATGGCGCCTTGCCCCTG…
c35888_g653_i0	4791	1415.12	XP_021197830.1 ADP,ATP carrier protein [Helicoverpa armigera]	0.0	95	GTATGACGGAGCTGCAGCTGTACTGTGAAGCCCCTTTCAGACTGGTTGAAAGTAAAAGGGGCATCCATAGTACAACTGCAGCTGAAATAAAGATTTTATACAACGACGGTGGCAAAAGGGCTTGCGGCCTGCCTGACGGTGGGCAGTCGCCGCAGCCTATGGACGCCTGCAGTACCAGAGGCAACACATGCACATGCACCCCTTCAAAAACCTATTTTACGTTACAGTTCCTTCTTCGCTTTTCGTACATAAAGTACTTAGTTTATTTATACGTATTACTACGTGGAATTTTCCACATTATCTAATATTATATTCCAATTGTGACTTGATATCGTGATGTTTTAGATAGATACCTGAGTATATTTGTGTGGTACATAGGCAGGCAGGCAGGCAGGTACG…
c48792_g1_i0	2346	1396.88	XP_012549671.2 myosin light chain 1 isoform X2 [Bombyx mori]	3e-75	93	TAAATGATGAAGACCATATTATTATTTTTTATTTTTAATCAAAAGAAAATTAACAATAAATGGTGGGTATGGGTAACACGAGGTAATTAATAATAATACTTATCCTGATTAACTATAATTATCACATTTTCAAAATAATAAAACATTTGAAATTAAAAAATGACAGAACTCCAACGTTTGGAGATAATCATTTTTTTACAAAAGTAATGCGTTAATCATAAAATCATCACCACTTTCCATCAGGTGGACCATAAGCTTGTTTGCCACGCTGGTGGTATAAAAAAAAAATTTACTGTGTGCTATCATAATTTTGAAACAAATAATAAAGTAGGGAATTATTTTCATATTTTTTAATGAGTAGGTAGAGTTGATACGGTTGTGGTAGAACCACATGACACA…
c62438_g0_i0	747	1394.35	Uncharacteized protein			CAATATTACTGAAATCGTGAACGTGTTCAGTCGTTCTTCTCCGAGGTCGTACTATCTTGTGTGAGTGTTTACAGAAAATGGGCCTCATGGCAGCATTGATCGTTGGTGGCGTGGGAGGCGCCGTAGTTCTCACCGGTGGGTTAGGTGCCGGGTTGGTAGCTCCCATTCTGGGATTCGGCAGTTCTGGCATTGCAGCCGGCAGCCTGGCAGCGGGGGCTCAGGCCTACGTCGGGAACGTAGCAGCTGGTTCCATCGTCGCCAAGATGACGTCTATGGCGATGCTCGCTCCCACGCCTTAAGTCTCTGATGAGAGTTCCTGGTCGTTGGGAGCATCATTTTATGATCACCGTCAAAAAATTTGATTGGATAATAAATCGCTTAATAAAATTTGCTGGTTTA…
c42253_g1_i0	882	1386.11	XP_013145679.1 PREDICTED: thioredoxin-2 isoform X1 [Papilio polytes]	5e-55	82	TTTTTTTTTTTTTTTATATTTTACAACTATATTTAATGAAGTAACGATACATTTTAACATACATAAAAATGCAAAATACACTGAAATACAATAATCAAACCATCCAAGACGCTACCCTAACACAGTAATTAAGACACTTGACGGCAATAGAAAAATACATCTTTAAAAAAAAACACATTACGCGCAAAATAAACTCAACCAGCTTTGAAGCCATATTTAACATTACCGCAAAGGCGAACAACTAACATATAGTCCTATCATTTATCTTTAAACCATTACTGGACACTGACAATTTGGATGCATCAATTACAATAGGAAAAATTTGTTTGATTGTAACACCATAAATAATTCAAGGTCTACGATTGGTGCAATACTGGCTGGTGATTTAAAATCCGGGTC…
c40281_g1_i0	991	1380.73	CAH59767.1 NADH dehydrogenase subunit 1 [Aglaope infausta]	1e-158	81	TTTGGCAGAAAATTGTGATGATTTTAGAATTCATTAATATATAATTATTTATTATATAGATAGTAATGTTAATAAAAGATTTATTAATGATTTTAATTGGGTTATTGATTTTAATTATTGGAGTATTAATTGGAGTAGCTTTTTTTACATTGTTAGAGCGAAAAGTTTTAGGATACATTCAAATTCGAAAGGGCCCTAATAAAGTAGGATTAATAGGTATTTTACAGCCTTTTTCAGATGCAGTTAAATTATTTACTAAGGAGCAAACATATCCGAGATTTTCTAATTATTTAAGTTACTATTTTTCTCCTATTTTAAGATTTTTATTATCTTTAGTTATTTGATCTATAATTCCTTATTATTTTAACTTAATTAGTTTTAATTTAGGAATATTATTTT…
c33794_g0_i0	10471	1363.29	XP_021197525.1 apolipophorins isoform X1 [Helicoverpa armigera]	0.0	58	GGCATAATTTACGGTGCTCTGATTGGCTGCGCTCCCGCACCGCGTCTATAAAAGCCGGTGAGCGTCCGCTCCGCTCGCATTTACCTACCGACCGGGGTAGACGCGAGTCAATAGTATTGTTAGATTAAGATATCTATTATTTTAGTGCAACTACTCAACCCCACCAACATGGGGCGGAGTTGTTTGAGCTTTAGTGTTCTCTTAGTACTAACTGTAATATGGAAACCGGCTTTTACTGATGACGCTTGCTCTTTAGGATGCAAAGGATCAAACCAACTGCCGTGTTTCCTTGCCCGTCACAAGTACAACTATGCTGTTGATGGCACCGTCACCTTGTATCTAACTGGTGCTGAACGCCAAGAGACCAGCGTTAAGCTAAACGGCCATGCCTCCGTGACT…
c47673_g0_i0	826	1331.4	XP_026740963.1 40S ribosomal protein S6 [Trichoplusia ni]	2e-150	96	CATGGCTGTCGTTTGTAGGATAAAGTTGCAGTCATGAAGTTGAATGTCTCATTCCCCGCAACGGGATGTCAAAAGCTGTTCGAAGTAGTAGACGAGCACAAGCTCCGTATCTTCTACGAAAAGCGCATGGGCGCAGAAGTAGAGGCTGATCAACTAGGTGATGAATGGAAGGGCTATGTGCTCCGTGTAGCCGGTGGCAATGACAAGCAAGGTTTTCCTATGAAGCAAGGAGTGTTAACTAACAGTCGTGTACGTCTGCTGATGTCCAAGGGCCACTCATGCTACAGACCCCGTCGTGATGGTGAGAGGAAGCGCAAGTCTGTCCGTGGCTGTATTGTTGATGCTAACCTCTCTGTTCTTGCACTTGTTATTGTTCGCAAAGGAGAGCAGGAGATACCT…
c56416_g3_i1	831	1331.38	Uncharacteized protein			GTGGAGATTCGTGCTCCGGTCGGCGTATAGTCAACACATTTATTTATATAAAATAATTAGAATGAAATTAATATTGTTAACCTTATTGGGGCTGGTGGGGCTCGCTGTCTCTAGCACCAATCTCCACCCGCGCGGCTGCATTTATGTGATGGGCAGGTGTTACAGAGAATGCGAGGAGGGCACCCACGCGTACACCACAGGCTGCGGATACCTCACTCCTGAAGCAACATGTGACAATCCCAGCCCGGTAGAAGACACCAGGGGCAAGATCTGTGATTTCACTGCCTGCTACTGCGACCCACCAACCGTCAGAGACACAGTGTCGAAGAAATGTGTAAAGCTGGAGGAATGCCCACAAAAAAATGCTTAAAATATTACACAATGTGATTCACATTTCAC…
c33223_g0_i0	247	1323.07	Uncharacteized protein			TGTTTTCCTTGCAGAAGACGCGCTGCATACAAATATTAAATGAAAAAATATAAATCGGATGTGCTCGGGCATTTATTTGTATTTAAAGACGGTATTTAAATTAAAAATACATTAACTTAGTTACATTAAAATAAGGTTAATTGAAATAACATTCCAGTGGTTGTGATAGATTGAAAAATATTTAAAATTTAAACATGGTTGTGAATATGAAAATGATTTATAGCGGTGATGGCGCGTCCCTGAGCGC
c58568_g1_i1	3383	1246.1	XP_013201116.1 PREDICTED: heat shock protein 68-like [Amyelois transitella]	0.0	91	TCCCTCATGTCTGAGGATCGTGGTGAGCATCGGGGTAGCCATTGGAGCGGATGATTTGTCTCTACCGGTTTCGATCCAGCGCGTCTCTCACGACCGCGTAGAGTTTGGAGGACGATGAGTCTTTGACTTGATAGGTACATCTAGTTGGTGAGCGACCATGCGATCGTAGCAATTGAAGGTAGGTAACGAATTATATTCTTTTTATCATATGAAATTACAAGTCTTCATAGCATTTATATGCTGTTCTTTATGTCATATCATTAGACCCAAAATTTAAAATGACCAAAAATTTTTTTGAAAAAAATCATTTTAAATTACCTTTAATTAATGGCCACAGTTTCCGGCACATTTCTAGAACTCGGTGCACTTTAATTTTCTTAAAATAAAGACTTTTGCATC…
c77989_g0_i0	854	1245.89	XP_028039289.1 40S ribosomal protein S3a [Bombyx mandarina]	1e-168	97	AGCTACGTAATCCATAAACAAAGATCTTTCTCAAGTTTGCGAGTGATCATGGCGGTTGGTAAAAATAAGGGCCTCTCGAAAGGCGGCAAGAAAGGTGTTAAAAAGAAGATTGTCGACCCATTCACTCGCAAAGACTGGTACGATGTTAAGGCACCGTCCATGTTTACCAAGAGACAAGTGGGGACAACCCTCGTCAACCGTACTCAGGGTACGAAAATCGCGTCTGAAGGCCTGAAGGGACGCGTGTTTGAGGTGTCGCTGGCTGACCTTCAAGATGATACTGATGCGGAAAGGTCTTTCCGCAAGTTCCGTTTGATTGCTGAGGATGTTCAGGGGCGCAATGTGCTCTGCAACTTCCATGGTATGGACCTCACCACTGACAAGCTCAGGTGGATGGTT…
c61625_g0_i0	729	1230.83	KPJ16499.1 40S ribosomal protein S17 [Papilio machaon]	3e-79	100	GTTTTTCTTTTGAGTGGATTTGTCAAACGTAAAGAAGAATTCATAATCATGGGTCGTGTCAGAACCAAGACCGTAAAGAAAGCGGCTAAGATTATCATTGAGAAGTATTATACCAGATTAACTCTTGATTTTGACACTAACAAGAGAATATGTGAGGAAATTGCTATCATTCCAACAAAGCCCCTTCGTAACAAAATTGCAGGCTTTGCCACCCATTTGATGAGGCGTCTGAGACACTCGCAAGTTCGCGGCATATCAATCAAGCTGCAGGAAGAGGAACGTGAAAGACGTGACAACTATGTGCCTGAGGTTTCCGCACTTGAGCATGATATCATAGAAGTTGATCCCGACACTAAGGACATGTTAAAGATGTTAGATTTTAATAACATCAATGGACTT…
c51073_g0_i0	626	1217.84	XP_013190669.1 PREDICTED: 60S ribosomal protein L18 [Amyelois transitella]	1e-108	96	ACTTTGTGATTTATTGTCTATACACGAAAGTCTCTTTCTTCCGGTTGTCAAGATGGGTATCGATATCAATCATAAACACGACAGGAAAGTTCGGCGTACTGAAGTCAAATCCCAGGATGTGTACCTGAGATTACTTGTTAAATTATACAGATACTTGGCGAGACGTACAAATGCTAAATTCAACACGATCGTTCTCCGTCGCCTGTTCATGAGCCGCATCAACCGGCCACCGATCTCTTTGTCCCGTGTGGCTCGCCATATGAAGAAGCCCACTCGGGATGGTCTGATCGCTGTGGTAGTTGGTACAGTTACTAATGATGTGAGGTTATACACCGTGCCCAAGATGACCGTGGCTGCTCTCCACGTTACAGAAAAAGCTCGCGCACGTATCTTGGCTGC…
c41656_g0_i0	1198	1198.42	XP_030028544.1 circadian clock-controlled protein daywake [Manduca sexta]	7e-34	43	AAGGTGTCTTAGAGACTTAAAAATAAAACTCTTGTAATTCTTCATATTTTCTCTAAATAAACTGACATTCATTCAAACCATATGGTTCAGATATTCTTCGAAGCGTTGACACATATACGCCCTCCAGTGAGAAGTTGTAATTGTTCTTTTAATGTTTATTGTGATACCAACGCGCTGTGTTTTGTCACCGATGACGTTTTAATGACCAGATAATATAATTTATAGGCTGCAGTTAGAGACATTAAAATATTAAGAGATTTCAGGATGAGTTTTTATTTGGTTAGAAACGACGAGATACTTTCTGTTATACTGTAAATAAAAATTGTTTGATATCGATACAAACTGTTGGTATTCTATCTTAGGGTACATGATCTTTTTTTATAATTTCAAGGTTTAACA…
c58059_g4_i0	634	1185.18	XP_022837930.1 myosin heavy chain, muscle isoform X28 [Spodoptera litura]	8e-142	97	GTGGTAAGAAGGGCGGTGGTTTCTCTACTGTTTCCTCCTCTTACAGGGAACAACTAAACAACTTGATGACAACACTGAGGTCCACTCAACCTCATTTCGTACGTTGTATCATTCCCAACGAATTGAAACAGCCTGGTCTCATCGACTCCCACCTTGTCATGCACCAGCTGACCTGTAACGGTGTGCTTGAAGGCATTCGTATTTGCCGTAAAGGTTTTCCCAACAGGATGGTGTACCCTGACTTCAAGCTCCGTTACAAGATCCTGGCCCCTAAAGCTGTGGAGAAGGAAAGCGATCCCAAGAAAATCGCTCAAGTCATCCTAGACGCCAGCGGTTTGGACGTCGAGTCCTACCGTCTCGGTCACACCAAGGTGTTCTTCCGCGCTGGTGTCCTGGGTC…
c50209_g3_i0	295	1177.79	XP_037300057.1 LOW QUALITY PROTEIN: titin [Manduca sexta]	1e-16	76	AAAAAGAAGCAGGGACCTAAAGAAGAAATCACTGAAATCACTACCGTTGAAAAAGATGGTGAGGAACCCATCACTACAGTTTCTGTAATAGAAGAGGAAAAACCGGAGGGAACACCGGTCGAGATCGTTGAATTGTCTGAGGAGACAACAGTTGAGGAGGTCGAGACTTCAGACGGTAAGCCTGAACAAAAGAAAGTAACTAAACGCGGAATTAAAAAGAGAGTAGGTCCTAAAGTAGAAACTACACAAATTACAACTGAACAACTCGATCACGAACAACCTATCATAACAGTAC
c57470_g0_i0	5034	1140.26	XP_026761362.1 titin-like isoform X2 [Galleria mellonella]	7e-112	66	GAAACCAGGTGGAACCACTCTGAATTAGCACTAAGTGAATTAAGAATAGTTTATTACAGAACTTGCATTACTATTTAACTAGCGTACCACAGTTTCTATTTTCAGATTAGAAAAACCTTTTTCGCATTGTACCTAACTCGAGTACTTAAATAGTCCAATAAAAAGCAATATTATTTAATTATTTATTAAACAAAACTCAACAATAATGATTCCACAATTTATAGTACAAAATGTGAAGTAACTGTTATTTTTAATCAGCTTGCTTCAAGTATGAGAGAAAACGATAAATTAAATATTATAAAACTATCTTATTACGGAACTGTTAAAATTGTTATGGCACATAAAGTTACAATTAATAAATAAATTATTTATTAACAACACGTGTACATGTGACCTTTT…
c41287_g1_i0	702	1138.76	XP_011549511.1 larval cuticle protein 1-like [Plutella xylostella]	9e-24	56	GTGTAATTTATGATGAATATTGTAATAGCATGTTGTTATTTATTACTATTATTTTTTATCACTAAAATATGATACAGGCATGAATTTATATATTCTGTTTATACGTTAAATGCCTTTAAATCATTATTTTAACATTACGTAAATACATAGTAGATACGTAGTTTTTAAAAAAAAATATACATATAATTTGTTTCCTTTATTTATATATTCTTAAATAAAAACAATTATGTTAACGAGCAACGAAATCATCTTGGGAGTGTCGGTTGAATTTTTTACATTCACAGTGTGTGTTTGCCATTCCGTATTGTGATAACTAAATAACTAGCGTACTGCTTATTGGGCTTTGGGAATTGATTTTCCTTCAGCGTGGAAACCAGTTTCGTCGGCGTAGTAGGTGAT…
c57015_g1_i0	2832	1117.12	XP_026762851.1 WW domain-binding protein 11 [Galleria mellonella]	0.0	65	TACGTGCGTACATTGGTACACACAGAGGTTTTTTTTTTATTTTTAGGTGCTAACTTTCTCTCGGCCCAAGCGGGCGAGTTTTATTTTCTTATTGATTTTAGCCACTGATACATTATTCATATTATGTATCAGTATAAACAATAATACTAAGCAGAGCTTGTAGATACTATGACAACCAGACCACTGATAAACTTACATATATATTTCTAAATATATACAAATAGATCAACTACACCTAGACACAGGATAAACCGTCGCGCTCAACACACAAAGTTTTGAAAAACATTGTAGATTTTTAAATTAACGAAATCAAACAGCAAGTTATTAACTAATAAAAATATAATTTAGGATCACAAGTTTTGTTTCAAGTAAGTAAAAAACATATACAGCCTCCATAAT…
c54533_g0_i0	3154	1115.51	XP_028165103.1 heat shock protein 68-like [Ostrinia furnacalis]	0.0	94	GCGCCAAGCCACGAAGGATGCAGTCGCTATCGCCGGCTTAAACGTGCTCAGGATCATCAACGAGCCTACCGCGGCCGCACTCGCCTACGGCCTCGACAAGAACTTGAAAGGTGAGAGGAACGTCCTTATCTTCGACCTCGGCGGCGGTACCTTCGACGTGTCTATACTATCTATCGACGAGGGCTCGCTGTTCGAAGTAAAATCGACGGCAGGTGACACGCACCTTGGCGGGGAAGACTTCGACAATAGATTAGTGAACCACTTAGCCGAAGAGTTCAATAGGAAGTACAAGAAAGACCTCCGTATGAACCCTCGAGCGCTGCGGCGTCTGCGCACCGCGGCTGAGCGCGCGAAACGCACGCTTTCATCCAGCACTGAGGCTAGTATCGAAATCGACGC…
c35888_g1343_i0	1326	1105.65	QOE88784.1 glyceraldehyde-3-phosphate dehydrogenase [Phauda flammans]	0.0	96	TGCATTTTTAAAGTTGATATTTTAATATATCATGATTAACATGCTTAAAGTAAAATATGTGTAGATATTTATTTCGCTACTTCCAAAGTACTTTCAAAATAATTTAGACAGTATTTCAGCATTGCATATTTTAAACTTAAAACTAAAAGCGTCGAGTCGACAATGATTACATTTCACTTTTTACTAAGAAATAAAAAATTTAATCCTTTGTCTGGATGTACTTGATGAGATCGATAACTCTGCTAGAATATCCATATTCATTGTCGTACCAGCTGATTAGTTTGACAAAATTGTCATTCAGAGAAATACCAGCTGCAGCATCAAAGATTGAAGAGTGTGTATCACCAATAAAATCAGAAGATACAACTTGGTCTTCAGTGTAGCCAAGAATTCCTTTCA…
c80292_g7_i0	3842	1083.56	XP_013140437.1 PREDICTED: tropomyosin-2 isoform X26 [Papilio polytes]	2e-118	99	TATTAGTGTTGCGCCGTCCACCGACGGGGCCACTCCTTCAGCAGGCGGTGCAGCACCCTCTGCAGGAGAGGCAACGAGAGCACCTTCCGCTGGTGGTGCTCCTTCTGTAGGTGGAGCCAATCCTTCGACCGTTGGAGCTGTACCGTCCGCCGGAGGAACAGCGGGGGTCCCTTCCGCGGGGAGAGCTCCGTCGGCGGGCTGCGTGCCTTCGGCCGGTGGCGCCTCCTGTGCAGGTGGGGCGGGCTCGGGTTCCGGCACGGGCTCGGGCTCGGGCGCAGGCGGTGGGGTCGGGGGCTTCGGGGGGTGCAGGCGCTCGTACTCGCGCCTCGCTATCTCGATCTGCCGCAAGGTCGGGTCTACCCCCGGGATGAGCTCCACGAACGAGTCGTCGATGTCGTC…
c69234_g0_i1	4666	1079.81	NP_001298348.1 elongation factor 1-alpha [Papilio polytes]	0.0	98	AAAAAATAAAAAAAACTAACCTAAAATTTGTTTTCTCTAGTATTTTTATTCTTATGATAACAGTTTGAATTTTAAAGTACATTCAACTTCCAATGTAATAAATGTTAGTCGTTTTCTATTAAGTTCCTGATTAGAATGCCCGTTTTCAAACCACGTGGTCTACGAGGCATTTCCACAGGACAACTTTGTTTAATTACAGTGTTAGGGGTAATAGGCGGTATTTACATTTGGAAACCACTTTTCGAAGCACGATATCCAAGAAAAAAAGATACTGAAAATTTTGTTGAAGCTCCAACAAATTAAAAGAATATGGAGGCCGTCAAAACTTGGCTTAGAACTTCTAGTCCTGTAGTTAAGACTTTGATGGCATTGTCTGTGACGACATTGCTCATAGTAGGA…
c50440_g15_i0	1278	1067.71	Uncharacteized protein			GAATTATTATTCAAATATTGATTTCCACCGATGTTTCCGTTTCCCAATATGTAAAACTTCATTGTTCCAATAAAATTAAGAGCCACAATTGTAGCCACAATAATATGGAGCACATTGACATCCTATGTAGCCACCGAAGGGCGGATATCCACCACAGTTGTATCCGCTGTTATAATATTGACCACCTTGACATCCTGTGTATCCACCTGTGTTTCCACCACTGCAACCACCTTGACCACCTTGAAGTCCATCGAATCCACCGTTGCTTACAGTCGGTCCTTGACTCACTTGACCTCCAACGATCCCATCGCTGTTCTCACCAAGTACATTATCCAACACTGACAACGGGCCATCGTTGCCACCAATGAGATTGTCAAGGACAGGTGAACACATCGCTGC…
c61970_g3_i0	3939	1065.72	XP_021187969.1 four and a half LIM domains protein 2 isoform X5 [Helicoverpa armigera]	0.0	97	GGGAACGTAAACGGCTGATGATGAATAATTCTCATTAATCTGGTTAAATTAATGTATTTCAACCTTAGTTTGATTCAATAAGCCGTGTCTAAATCAATTAAGATTATCAAGTCAAACGTCTCTGCTGATGTCTGTGCTAAAATTATTGGGCATTACGAGAAAGTGATTTAATTTTTATTATTAACGGCTTGAATATTGACTTTGGCTTGGCATCGTTTTCAATTCTAAATTTAGTGCCCTGACGAATGTAACGCCTGTTCCAGTTCAAAATAGATTGTGTAGAAAGGGGAGAAATAGTTTCATTACACAATGTTAGAGAGTATAAACAAACTAAATCTGGAATGACAATATTGCTTTACCAAAAACAAAATGGCGGTTGTGACGCCATATTGTTTAAAA…
c60713_g1_i1	2027	1064.3	AYP30836.1 CSP11 [Corythucha ciliata]	2e-65	83	TTTTATTATGGATATCTGACTGATACGAATTCACAAATTCATTGGTACACTTATCATTACAGTCACAATTGAAAACTCTCGTTCATGCAACTATGTATCTAAAAAGAGATACGATTGAAACGTTTTCAAAATTTATAATTTATATTTAAGAAACAGTTAAAGGCCCGGGAAAATTTCAAATCAAACATGATATAGTATAACTCGATATAACGCTTCGGTACCAACTTCACTGTTTGATCGTAATTGAATTCTCAGTTTTTCATTACTTGTAAAGCACCGCCACATTGTGTATTCACGAGAGCGTTTCCACTCAACTCCTTGAGGCACGTATGAAGGAAATAATTTGTATCTCACAAGATCACAGGTTTCAGCGACAGTAATGTACACATTAGAATTATA…
c39561_g0_i0	604	1013.27	KOB76676.1 Ribosomal protein L22 [Operophtera brumata]	7e-45	98	AATCAATATATTTAACTGACTGTATTCTTTAATTCAAATAATTCTATAATAGTTACGTATCAAAGGAATAACCAAAATAAAAACAAGATTAGTGTAAAACTATTTTTTATTGTATCAAGAGCTTAATCTTCATTATCTTCATTGTCGCTGTCTGCATTAATGTTGAAGTAGCGGAGCTCGTACGAGTCGTGGGCGGACGCCACCACGCGCAGCCAGTCTCTCAGGTTGTTCTTCTTCAAGTAACGCTTCGTCAGGTATTTAAGGTACCTCTTGGAGAAGGGAATGTCTGCGTTGACAGCAACTTTTGTCTTATCCCTGGCGATGACAACGTGATTGCCTAGGTTATTTGTTTTGCCCTCAACTTTAACATGTTCTTTTAAATATTTCTCAAAGTTAGCT…
