# Supplementary material for: Transcriptome analysis identifies candidate genes in the biosynthetic pathway of sex pheromones from a zygaenid moth, Achelura yunnanensis (Lepidoptera: Zygaenidae)
Source: PeerJ. 2021 Dec 14;9:e12641. doi: 10.7717/peerj.12641 (PMC8679906; doi:10.7717/peerj.12641)
Supplement: Supplemental Information 4 [file peerj-09-12641-s004.xlsx]

## Sheet: Table S3
Gene_id	Length (bp)	FPG_FPKM	FA_FPKM	FH_FPKM	FT_FPKM	FAb_FPKM	FL_FPKM	FW_FPKM	MA_FPKM	MH_FPKM	MT_FPKM	Mab_FPKM	ML_FPKM	MW_FPKM	NCBI blast result			Sequence
															Blast hit	E value	Identity (%)
c21219_g0_i0	203	58.37	0	0	0	0	0	0	0	0	0	0	0	0	Uncharacterized protein			CAAAGCCATTTTCTCCATCAGCGTTTACAATGATCCATCTCGCTCTAAGTGAAATACTTTTAGATGGACCTGCAATATATTTACTTTACCAGCACTTATTCGTCGTATAGTAGTACTGGAAAGCGCGGTCAACTCTACGACGCGCTTTAAAATCAAAGATTGAATTTGATTTACACCTTCTTCTTCCTTTATTTTACGATAAA
c29321_g0_i0	207	48.05	0	0	0	0	0	0	0	0	0	0	0	0	Uncharacterized protein			AGTGTGGTTTTACATTTAGTTGCAAATTGTTGTCAATTGTTCAAATTTAAGCTGCATTTATCAATTTATGCAGCTTAAATTTATTATTTCAGACGAAAAGATTAGGTACTATATCAAAAACAAACAATGTGTTATTGCAGAACTATACAATCAGACTATCACTCTAGCATCGCTAAGTTATACATCTTTTGTCGAAAGCATTTGTTA
c50547_g0_i0	202	40.92	0	0	0	0	0	0	0	0	0	0	0	0	Uncharacterized protein			TGTCATTAGCAATTCATCATTCATTTTCCTTTTTCTATTTACTTATTGTAGACCCGACAATAAACTAATTCTCAACGGTTCATAGTTCTCGAAACTTTGTTTTCTTTTATTTTATTTAGACTTAAAATAATTTTGTGTAAGAACTTAAAATAATCTAGAAATATTTACCACCATTTATTTTATCATCATCATTATCAGCCGG
c30733_g0_i0	203	38.91	0	0	0	0	0	0	0	0	0	0	0	0	Uncharacterized protein			TTTGCGACAAATTGGCAAGGTAAAGAAAGCTTGATATGTGGGTTGCCCCACGAATTTAACGATTGCCAGCGCAACATACGCGTCGGGACCTGCCACGTACTGCTAACAGGCTCAGAAATGAAGGAATTTTGAAAAACGAATTGTCACGTGCGACGAAAAATGGCCATCGACTGGTTGACAATCGAAAGCATTCAGCAAGTTGG
c23276_g0_i0	210	27.87	0	0	0	0	0	0	0	0	0	0	0	0	Uncharacterized protein			TTTACCTCTTACTCCAACCAACCTACATCATTTTATAAGATCAGCAGCCCTTTAAGACTTCTGCACACCTCTGGAAGTAAAACTAGAGATTAGAAAAGCTGTGCACGTTGATCTGCCATGCTCCGGCATTCTATAAGCACGTGCTATGGTGGTACTTCTTCCTCCATGCATCCTCTACATTTAGAAGGCTGTCTGTTACACCTATGGTAA
c41188_g0_i0	224	23.24	0	0	0	0	0	0	0	0	0	0	0	0	Uncharacterized protein			AGACGGAACTACTCGTAGTAACGACTCGTCGTGCCAGAATTTGAATTATGAAACCAATTAAATGAAATTTTAATTTAAACTCATCAAAATACATGGCGAGGAGACCAAAAAAAAAACACTACAGCTACGTTAATATATGAATTTTATGTAACACCTAAAGCAATTTTTTTCTTAGTTCTTTCCATTCATTTTTCTTTCTATCAAAATGAGTTAATCTAATGAAG
c76540_g0_i0	226	21.53	0	0	0	0	0	0	0	0	0	0	0	0	Uncharacterized protein			CCTGCCTGTCTCCTGCCTTTAGGCATACAATACTGATAATAGTTATGTTAGTATTTGAAAATATTTATAATTAAATGTTCAAAAAGGTTCTATTAATTATTATTATTAAAAAAACGATAGTATTCCTCTATTATATATAATGTTTTGTTAATAAAAATATTATGTATGTAGGTCCATTTTAAATATCCTATTTTTTATTATTATTTGTACATTTCACACATGGTCA
c16909_g0_i0	216	21.41	0	0	0	0	0	0	0	0	0	0	0	0	XP_032528618.1 piggyBac transposable element-derived protein 3-like [Danaus plexippus plexippus]	5e-23	63	ACGATGCAAATTATACCAAGAAGGTCTGGAGAGATTCGCTCTGCAGCTGAAATAACGCTCGTGACGGTATTGGGCATTGACGATGACGATGGAACTGGGACTAGGTGTAAAATGGTGGGATGCAAAAGCAAATCCCGTGTCAAATGCATAAAGTGCAAAGTTCATTTATGCATAACCAAAGACAAGAATTGTTTCTTGGCCTTCCACACATAGATA
c57028_g0_i0	202	20.46	0	0	0	0	0	0	0	0	0	0	0	0	Uncharacterized protein			GATGGGGACACCAAACTGGAACTAACACTGTAGATAATATGTACCGGAGCTTAAATTGAGAAAATATTCTTTCATAAACCAAGCAATTCACTTAAGTAATTAAGATACCGAACAAAGCAAACTACTGAGGCAAATAAAGTTAATTAACTAAAGTTTAAGCCAACTTTGACTTGTGTTAAATATCCCACAAGGCAAAGCAATC
c16053_g0_i0	202	20.46	0	0	0	0	0	0	0	0	0	0	0	0	Uncharacterized protein			GGTTGCCGGTTGCCGGTTGCCGGTTGCCTGCCGCAGTGTAGCCGATCATCCGCGACCGGCCGCGACGCCTCGCCCTTCTTTTGTTCGAGGTATTAGTAATACGCGTCTTGATACTTCACCGGTCACTTGAGAAACGATCTAATTTTTTATGTGTATTTGATATTTTTGTATGGTTTCGTATATAAATAAAAAATGGATTTAC
c55773_g0_i0	203	19.46	0	0	0	0	0	0	0	0	0	0	0	0	Uncharacterized protein			GATATTTCGACGGAGTTGCAACCACCGTTTCCTCGGGATCACCATCCCGTGAACATGATGTTTATCGGTTGTGTATTTTAATATCGATAGTAACAGCGAAAATTGAGAGGTGTATATCAATAGCCGGGATGCTGATCGGGTGGCACATCATATACACGATCGTCATCTCTCGGATAATCGGATCACTGGAAATTGTCTAAAAC
c9266_g0_i0	205	17.63	0	0	0	0	0	0	0	0	0	0	0	0	Uncharacterized protein			TTATTTTCTACTTTTTAGCGTGTTCTTTAGTTTTTAAACTTATGGAGCAGGGTTGACTTAATGGGCATTAATTATACAAAAAAATTATATTATAAAATATAGATACCCTGCTGAAAAATCACTCTAATCTGTTGTCCCAAAAGCGACATATCTAAGAACTTCAAGAATCATCGTAAAATACCTTTTTAAGCATACACTCTCGTTG
c34487_g1_i0	221	17.43	0	0	0	0	0	0	0	0	0	0	0	0	Uncharacterized protein			GTGGATGCACCTCTCGGTTCGTCTGATCACTGTCTCGTCCTGACACAAGCCACATGCGCA TGGCCTGATCCAACACCCAGTGTGCGTCACATATGGCAATACAAATCAGCAGATTGGGAT GAATTGCGAGAATTCTAGGCATCGTACCCTCGGAGGCAGCTTTGCTTCACATCAGGTGAT TCTCACACCTGCGCAGCCGTTGCCAGCTTTTTGTCCGGTAG
c70931_g0_i0	234	16.11	0	0	0	0	0	0	0	0	0	0	0	0	Uncharacterized protein			GAGTGTGACTCCATCATGGTGATCTAGGAACAATTAAATAAAATTAATAATACTAATATA AGTGAAACATTATCATTATCTAAGTGTGCCTCATGCCTCTCTAGTCTCAAGTTTCAGGTT CATAATATGAAAGATAACTTTATGTCACCAACAATATATTATTGAAGCATATAGACTCCT CTCAGCCACTCATGTGCATAACCATATATTTTCCTTATAGCCATTCCCAATTTA
c29624_g0_i0	207	16.02	0	0	0	0	0	0	0	0	0	0	0	0	XP_014359162.1 PREDICTED: craniofacial development protein 2-like [Papilio machaon]	6e-23	76	AGTCCCCCATGACAACGGTGTAGTAAGTTTTGGAGCTATGCTTGGCTCTGGAGATGTCCT TATACTGTCCTCTGTCTGGAAATGTCTCTACCTCATCATCGTGGTATGTCGAGGTCGGAG CGTATACCTCTATGACCTTCAGAGAATACCGTTTAGTGATTCTGAGTATAAGGTACGTTA CCATGGTCGACACACTCTCGATCTTCA
c70971_g0_i0	208	15.28	0	0	0	0	0	0	0	0	0	0	0	0	Uncharacterized protein			ATTTTGGAAATAGCTTAATTTTAACAAAATAAAGAGTTTAGTTTTATACACGTCTTAACC GAATAAAAATATCGTAAAATAGACCAACAGTGTACATATCTTGTATTTGGGAAAAAACAA TCAAAAGAATTTACAACGTGTATCGTAGTAAATATATTTTAGTAATTAATAGTTTTAGGT AGTGGAAATTAAAACTATTTGTAAAACA
c10601_g0_i0	225	14.91	0	0	0	0	0	0	0	0	0	0	0	0	Uncharacterized protein			AACTGATTTTGCTAAAATCTCTATCAAAGAAAGCATTTTTTACTTAAACTATATTTGTTG TGGTAACTGTGAGTAACATAGATGTTTACTGTCTTTGTCTATTTTCAGAAAATTTTAAAT AAATCTTCTTAAATGTAATTTTAATTATTTATATAGCAGGACTGAAGATGTGACTAAAAT TCTCTTGCATAGAAAAAGTATGATTTATTGTATAGAAATCATCCA
c9770_g0_i0	225	14.91	0	0	0	0	0	0	0	0	0	0	0	0	BAA21826.1 transposase [Attacus atlas]	1e-04	63	TTTTCGTCATAATGGATAATGAATATTCGTGTAATAATGTAATATGAATTCCGTATTACC AACGCGGCACAAAAGGCACGTAACTTAAACAATATTTTACGGAGAAAACTTTATATACTT TTATTAGTTTGCTCGGTTCAGTTCTGGAAATATTGACTTGAAAAATAAACCTCGTGATCG TGCGGACACTTTGGTCTACCAAGATGAATTAAAGGCGATTGTGGA
c7388_g0_i0	209	14.59	0	0	0	0	0	0	0	0	0	0	0	0	Uncharacterized protein			GAAGGGGAGCGGATGTTTATTTGGAAAATGATGTTTGTACATAATAAGGGGTACTTACTA ACTATCGTAGTTTATGATACATAGTTAGTAAATAATGTAAATAACAATAATAGGTGGTGC TTACTTACTATCTTAATTAGGATGTAGATTCTAGACTAATGTTATAGTAATGGAATGATT AACAATAATAGGTAATAGGAATATAAGAT
c66310_g0_i0	226	14.35	0	0	0	0	0	0	0	0	0	0	0	0	Uncharacterized protein			CCGAGACATTGGGTGATCGAGCAGTGAGAAACAGCAGAATACACAATAATCACATTTACA AACTTTCGTTATATAATTGATGCACTTATAATAAAACTACACAAACGAAACGAATAACAG TTCCTAGTGTGGAGGTCTGCACTCGTCGACGGCCAAATGGCAAGTGACCGTCATGTATGG GCGCTTCTCCATTTATAGGCAGTGTTGTAGCACGAAGTTACCCGAG
c84368_g0_i0	228	13.32	0	0	0	0	0	0	0	0	0	0	0	0	Uncharacterized protein			GGGTAAACTTGATTAGCTGTTAGTATTCAGTTTAAAACTTGCTCACTTATTATCGATATC ATACATTTTGATATTTGAACTGGCTTACCTCAAGTAAATTCTAACCGCGAGATAATTCGC AACCATCTGAAGAAGGTCCCCGATTGGGACTGAAAGCTGGTAGAGTATACTCGACATAAG AAATTGCTTGAGGTAAGCCCGGTACAAATATAAAAATGTGTTTTAATA
c29678_g0_i0	211	13.32	0	0	0	0	0	0	0	0	0	0	0	0	Uncharacterized protein			TCTAGCTAGCATATTCTCCGTCTAATCGTAGTTTAAGGGGTGTAGGAATTTAAAAATTTG TTTTTTCGCTTCACTTATACAATCTTAAATGTAACTGTGTTTCAGGATTGCGTTGTAAGT TGATGCCCTTATGTGATCCCCGAAACGTTTGCCAAAAGTGGAAAGTGTTCTCGGAACCGG TACCATACTGTAAGCCGTTCTTGGATCGATG
c78447_g3_i0	212	12.73	0	0	0	0	0	0	0	0	0	0	0	0	ADI61828.1 endonuclease-reverse transcriptase [Bombyx mori]	7e-20	84	GAACAAGCCGGATTTGTGAAAGGGTAAGGAACCCGTGAACAAACAAACCACAATAAACGC CCATTTTTCTTTACGCGGCAGAGACGTGGACAGTGCGCGAGTTGGAAAAAGGGAAGATAG ATGCTCTAGAAATGTGGTGCTGAAGAAAGATGCTCGGGGTATCGTGGTCAAAGTTCCGCA CCAACGTATCCATACTTCAGGAGCTCGGCATC
c81592_g0_i0	210	12.38	0	0	0	0	0	0	0	0	0	0	0	0	Uncharacterized protein			TACTACAGTCCGACACTAATCATTTGATTGAGTTTCACTCTCCAAATGTTACTTCTAGAG ATCTGCATTTTCATAGAAGGATTGTACGAGAAGCCATGAAATAAAAAATATATAATAATC GTGAAGACGGTTACGGGTGTGTGACCCCGAAATGGGCTCGCGGTCCGTCAGCGCTGCGTC CGCAGGAGGTGCTGTACGTGACGTTACTTGGTGACGTGTGTCCGGAGAGC
c35624_g0_i0	231	11.94	0	0	0	0	0	0	0	0	0	0	0	0	Uncharacterized protein			GTCCCTACCTCGTGTAGTTATCGAATTGAAAATCGCGACGGACATAATTTTGTGTATTAT ATAATAGATTGCTTGAATGTCGTAAATGAAATTTATTTGCGTTCAATCCTGCACAACTTA ACTAAGGATCGAAAAGATGCTCATGTCGAACGGTGCAGATAATGTTGAATAACTATAACC GTGGTGACTCGAAAGCTGTTTAGCTGAAATATCTACAGGTGAGGCCTTGAT
c12196_g0_i0	233	11.12	0	0	0	0	0	0	0	0	0	0	0	0	Uncharacterized protein			GTATTAGCATTATTTGCAGCATTGGGGTGCATGGCGATTTGGTACTTACCTGTATAGTTG GTACACCACAAGAAGCGTGTAAAATAACTATTACTTGACATAACATTGCATCTTCAATTA ATTTGTTAAAATTGTTTACCTTCATTTCATTACACAACGTGAAATAACATTATGTCATTG GCATGTATTCACGCAACAAATACACGTTGCCTTTCAAACAACTATAGAATGAT
c21051_g0_i0	233	11.12	0	0	0	0	0	0	0	0	0	0	0	0	Uncharacterized protein			TTCACAAAATGGTAACTGCCTAAGGTAAGAGTACATAGTTACGACATTATTGCTATTCCA TCATTGTATTAATGCTTAAAAGCGTTGATAACGTGTACAGTTATTTTCGATCATCGTTCG TACGTAAACAAACAAGATTAAGTATGATTGCTTTATTTTGCTTAACAGTTTAAACGTGTG ATATACCTAGTAGGAATATATTTTAATTTACTAAAGGCCTTGTTGCTACACCG
c39226_g0_i0	216	10.71	0	0	0	0	0	0	0	0	0	0	0	0	Uncharacterized protein			GGCTAAACTAGTTCTTCCTATACGGGATAAGATTAACTAGTATATCCTAGTTCAAACTAATTTGTCCTAAGCCCGATAGAATAAACTAGTATTTCCAGTATGTACATTGATTAGGTTAAGGTGATTTTTTTTCTCGAGCGCAACGAGGGCAACTTATAAAACACCCGCATATACAAGTCCTGACATGTTTGTTCAATTACTTTACTCTGCTAAATT
c73256_g0_i0	216	10.71	0	0	0	0	0	0	0	0	0	0	0	0	Uncharacterized protein			CTGCTTAATTTGGGATTGGATGACCGTGTGTGATATACCAACATATTATTAATAAGTACGACATAACAAAGATTTTTATTTAATTCATTCATGGGGGTAATATTGGCTTTGGTATTTAAACTGCATCGCCAAAGCGAAAAACTAATTTTACTATAATAATGAAATTCACTATTTATTTGCAGGCTTCGTGAACACATATCAGTGCTAGACAACCCG
c19071_g0_i0	235	10.38	0	0	0	0	0	0	0	0	0	0	0	0	APL98303.1 putative DD41D transposase [Bactrocera tryoni]	4e-12	58	CAAAATTCGCCATGTGGTGGTTTTAGATAACCCCAATTGTTGAGAACGACGAGGAAAAACGACGACAAATTTGGATCTTCTTCAACATTGAGGCTCACAGCTGCGATGTTTTCAGTTGAATGACCCGGTCGAACACGCGTTGGTGTTGGCACATTTTATACCGAGCCTGTCGACTCAAATTTAGCGACCAAATTCTTAAGAGCGGTCTAAAAAGGACGATTATGTTGTCCGAAAA
c54621_g0_i0	237	9.7	0	0	0	0	0	0	0	0	0	0	0	0	Uncharacterized protein			GAAATGCTGACCGGATACCAACCTGGAAAAACAAGACTAAAATAAATAAGTTCTTAGATTTTTAATAATTTAATCTCAATATTGTTTTTATATTGTTGAACGATCAAACAGCGATATCAAACGGTTGCGATAATAGGTACCTTCTTAAAGAATAATATAACTAACATACAATAAAACTGGATATTCTATAGTTAAAAAAATTAAAGAATACTGACCTCATATGCAAAGCCTTTGTAA
c34599_g0_i0	254	8.64	0	0	0	0	0	0	0	0	0	0	0	0	Uncharacterized protein			GTGTAACTTATAATCAGTTAAAATACTTACTTCTGGTTTTTTTTTAATGTGATGTAATGACGATCAAAAATTGAATTTAACCATAAAATTAATAAAATCTCGTCGCAGCGCACACTCAAGCATAATCACAGAATATTCACCATTTTGATTTATTGAACACCACTTTATTTTATTGACTACCAACTTTCAAAAACTAATAGTAGCGTTCGTATTTTATTTAAAATGCATTCATAATTCATCTGCCAGTAATAGTA
c63473_g0_i0	241	8.5	0	0	0	0	0	0	0	0	0	0	0	0	Uncharacterized protein			AAAGAATATAATTCGCAAAAAAACTAGCGCTCCATCAGACGAACTACGCAACCTAGTTTTCGCAGTTCCCTTACAGCTCACTCCTTATTTCAGTCGTTATAATTATTGTTCGGTGCTTTTTTAAAAATTTTATTTAAATAAAACTACATAAATAGCAGTTTATTATGAATATTTTTTTTTTAACAAAATGGGCTTACGTATAACTACAATCTCGCTTAATGGAAGGCAAAGATGTGGCCTA
c6144_g0_i0	223	8.05	0	0	0	0	0	0	0	0	0	0	0	0	QLI62204.1 glutathione S-transferase 8 [Streltzoviella insularis]	0.0003	49	TTTAAATAACATGTTGAAAGATCCCGTCGTACGACAATATCTGGTGCCGAAAGAGATCATGTTTGAATTTCTTGACTGTTACAAAAACAACCAGCCCATCAAGTACAACATTATCGTTGAGGAATAATATATTTATAAATTTATACATTACAATATTTTTATAACCGGCTTACCTCACGAAATCTTTAAATGTCGAGCATACTCGACCTGGTTTCAGTCCCAT
c12462_g0_i0	223	8.05	0	0	0	0	0	0	0	0	0	0	0	0	Uncharacterized protein			CTGGAAGCCTGAAAGTATGGAGGAAAACTAAACTGTACAGACCAATTTGCCATTAAATCAATGTATTTAACAACAAAATTAATCTTAAATGTAGAAATTAAGTAGAAATAATTTCTTAAATAAAAATGTATAATTTAATTATGTAACTTTAACAATGTGCTTTTGTTTATTTAAATTCATATACCTAATGCTTACGAGAGACTGCAAGCAGATGCTGGATGTG
c55601_g0_i0	278	8.02	0	0	0	0	0	0	0	0	0	0	0	0	Uncharacterized protein			ATTTAATGTTTATTAGTTTTTTAAATTTCATAACAGGTATATTACCTATGAAAGTGTCGTTTTGTATTAAATAAGTTAAAGTTAAATTAGTTAAATTAAAATTTTCAAGGTTTTTTATTTCTGCTATTTAAATGAATACCCAATCATTCGATGCATTTTTGCCAACGCAATAAGTTTATTGATTTTGCCTTTCTTGTTAAAATCAGCTGGATGGGAGCCAATAAACTCTTCAAAGGAATTTTATGTTGCCTCTCGGGAATGAAACTTTTTTTCCCGAT
c63828_g0_i0	258	7.75	0	0	0	0	0	0	0	0	0	0	0	0	Uncharacterized protein			GAATTTGGCCGGTTCTCCTGGGTTGAACCACTGTGATGACTTGATGAGCGTTTCTGATTATAGCATCCATTTTTTATCACAAGTATACGATTCCAAAATCCCCTTGTTATGACTGTGTGTGCCCAATTAAATCACCCTTAAATAATCTCTACAATATACTGTCTACTTAACACGAACACCAACTAAAAACTGATTCATTTATCAAGTGAACCCTATACATATAAATTTTCGCATCGCTCACGCGTCGCGGCGAATGTA
c40428_g0_i0	224	7.75	0	0	0	0	0	0	0	0	0	0	0	0	Uncharacterized protein			CAAATGGGAGTCTAAGTGCGAAAATGGAGCCCCCAATCTAATCCAATGTATAAACTACTATAAACCTTTACTCTTGATTTGATTCTTATGAAAACTGTATTAAAATCTGTTGCCTAGTTATAAAGATCTAAGCATACAGAGGGACGGGCGGTTCAAAGTGACTTTATACTATAATATGTAAAGACTAGTATGTGGTTTGCAAACCTTTAGCCATTTGAGTTTCA
c33298_g0_i0	225	7.45	0	0	0	0	0	0	0	0	0	0	0	0	Uncharacterized protein			GGTTCGCTCGACTTTAAAAATAGCTTGAGGTAAGTTGTTAGATATATTTGTGACCAGGGAGTTCAGTGATGCAACGTCAGGACTTACTCAGAAGTCCTGGGTTGACTAACTCAACTTTAGGCGACTAGGATAACATCCGATAGAACCCGATGTATGCGGTTAGCGGTATACTTTAGTCGTATACCGAAATAAATTTAAAATAATCGAATTTCTCGGTTATCGTTT
c49654_g0_i0	273	7.16	0	0	0	0	0	0	0	0	0	0	0	0	XP_013133274.1 PREDICTED: probable sulfite oxidase, mitochondrial isoform X1 [Papilio polytes]	5e-27	84	ACCAACAGGCCAGTCAATTTTACATGCAATAAATGAGTGAAAAACCAGCAGCACTAATCAGTGAGGATGTGATGAATTACCGAGCCACTTAACGCTGCGCACGGCGGGCGCGCCCGGCACCACCGCTCGCAGCGGCCGCCCGTGGTCGGCCGGCAGCGGCGCCCCGTTCATGTGTGTCGCCAGCATCACCTTCGTGTTGGGATCCAGCGCCATGTGCAGCGGGATCGAGGTGCTGAAGTTCTGCCCCGTGGCGTCTATGTCCGACCCCTGGAA
c34536_g0_i0	227	6.91	0	0	0	0	0	0	0	0	0	0	0	0	Uncharacterized protein			TCCACTTACCATCAGGTGGAGTGTGGTCAATCGACAGGACCTTTTGATAAAAAAAAATCTTTGTAACGGAAGAAACTCTTTGAAAGAGAGAGAAGATTTTTGAAAGAAACTTTCATCTTTATCATAACGTCAGATTAATAAGAAATTTTGCACTTTTGTCAATTTTGTAGTGTTCGTCTATTAAAAGTAGGTAAGTTCGAGTAAAAAAATTAAAAAATAAATAATAG
c53934_g0_i0	227	6.91	0	0	0	0	0	0	0	0	0	0	0	0	Uncharacterized protein			GAGAGGACTGCCAAAACTACTTGTTAAGTTTTTTTGATCAGAAGACCTACAATATGGCAGAAAGTCATTGAACAATAAGTTTTCATATAAAATGCAAAAAAACAACCTATTATAAGAGAAATTATTATATAAGCGAAAAAAATTTGATACAGTTTTACTTGTACTTTTTTAATAATTTTTAAAAACCTTGTACGATTTACTTATTAAACAATCAAATCAAATAATCA
c42487_g0_i0	228	6.66	0	0	0	0	0	0	0	0	0	0	0	0	Uncharacterized protein			CGACGAGCATTCGTAATGGTCTTACAGTCATGGTCTTGGTCTGGCGATTTTTCAAGATAAAGAACAAGTTGAGAATTTACGGCAAAACGACGTGAGTAGTGAGTAACGGAATAAATAAGCAAGACCAAGACTAATACTGAATACAAAAGACCAAGACTATAAGCATTTTAACAAGACCAACACCAAGACTGGACAAGCAAGAGTAAAACCGATATCAAGACTTGCTTA
c61167_g0_i0	229	6.42	0	0	0	0	0	0	0	0	0	0	0	0	Uncharacterized protein			ACAGCTTTTGAGTCACCACGTTTATATTTTTCAACATTATGTTGCTTCGTTTGACACGAGACTCTTTTTGATCCTTAGGTTGTGCAGGATCTAGCGAACAATTTTAATACAGCTGAACGTTTATCTCGTCCGTGAGCGTCCACGATTGACTTCACTAAACCACATGCACAGTGGATAGAAATAGAGCTTTCATCACCTGTTGCTGCGTTAAACCACGCCGAGGTGACAT
c5935_g0_i0	229	6.42	0	0	0	0	0	0	0	0	0	0	0	0	Uncharacterized protein			AAAAAGCCGCCATATTGAATAATAATAATAATAATAAAATGTTACAAAAGGCCGAAAAATTCTACAAACAAATTAATTTATTAACCAATAACTATATTCCAAACACATTACGTACAGTATACAACATAAATTTGGCCAACACTTGGCTTAGGCCCGTGTTCGTCGAAATACCGGTAATGACCGAGCAAAAAAAGATAGAAAAGAAAATAATAATAATAATAATAAAAAT
c28723_g0_i0	253	6.26	0	0	0	0	0	0	0	0	0	0	0	0	Uncharacterized protein			GTTGATAAACTTGGAGATGGCGCGTCTTCTAAAGTTAATCCTTCATCCGATTTTCGGGCACCCAAGGAATTCCGGCCGGATTCCCGACCCATCCCGATCAATATATGTTTAGTTCACAACAAGAAATAACATTAATTTCTACTGACGGAGATTGATGCTGATATGTTATGGTAAAGCCAGCTGTTGACGGTCCGACTAAACATCGCAATTATATATACATTAATATACTTTGATGTATTCCATTAAATAAACT
c25686_g0_i0	230	6.19	0	0	0	0	0	0	0	0	0	0	0	0	Uncharacterized protein			TTTTCTACTGACCTGACTCCGGCCATTCCTACAGGTCAATTCCTAGTTGGGAATCTGATTGCTTCCGGTTCGGGGAAGTCTGGTTAGGCTTTATATTATTATTATTTACTCTGTCATTATGTCGTCCTTTCATTTATAGTTCTGATATTTAATAATAGATTTTAATTGATTTTATTTTATTTATAAGTTACGTACTATAACAAAAATAATGGATCGCTACGATTTTATCC
c52113_g0_i0	271	5.62	0	0	0	0	0	0	0	0	0	0	0	0	Uncharacterized protein			ATCCACTTTATTCTCTCGCTGTATAAAATCATTGTAAAAACATCAAGAACTGTACCTAATTCCGAGCGCTGGTGATGTATTGTATTGTTTTACGATTTGTATTGTTTTACGGGTATTACTGATATTGTTACTTTTCCCGCTGCTCTGGATGGGTTGGTATAATGTAGGAATATTGCGATACAAAGTCGACTTCCAATCGCTACAGTTGGACGAGCCGCTCGACGATGTTGATCTCGACGACTATTAGACGACACGACACGACACGACGCGA
c10778_g0_i0	233	5.56	0	0	0	0	0	0	0	0	0	0	0	0	Uncharacterized protein			GACAAGGTGGGAGTCGATGAGACCTGACAAAAACAAATCAGACTTTTACTTACAACCGATCTTTGAAAATCGTAATATGCTAAAAAAATATTAATAATAGTTAGCAAAACTCTCTATCATACGGTAAATAGTCTTTTTATTTGAAATCACATGGTATATTGTTTACTAAGTCATTTACAGTTATTATTATAAAAATACTTAATATTGATTAATTACGTGCTATATAACACTTA
c50079_g0_i0	235	5.19	0	0	0	0	0	0	0	0	0	0	0	0	Uncharacterized protein			GGCCGATCGCATATCAGGAATGCTGAAATAATTATATTTTTATAGCATTTAGTATCTAGTAGTCAAACGCTTTTTGGCCACGGAATCTAATAAAAAAATGGCATATTCTAACGCGTCTCTCGTTCCGAGTTCGTATCAATGTCATCTAAAAAGCCATGTTTACCTTGTACTTGAAAGCATATTAAACATTTGTGAGATATTAACAGCAAATTTGTGGTATAAAATTATGAGCCTT
c83192_g0_i0	289	5.15	0	0	0	0	0	0	0	0	0	0	0	0	Uncharacterized protein			ATGGGATACAAACATGTTAGGGAAATAAGATTTGGTTTGTTAATTTCTTCAGATATAATATAATTATTTATGAAATATGAATTAAATACTGTGTTTTTATTTAAAAAATTCAACTTAGCCAGAGGTCGTTGTTAATTTCACAGAACATACTGCCTATCAAATAAGCAGTATTCTGCATTCTGAAGATTCAAATTAGTTAAAATAGTCGAATAAGGAAAGGTTCTCGAATGGCGACCACCAACCGGAATACGCAGGTCTCCGACAAGGACCGACGATCTAGTAAAGATCG
c52253_g0_i0	238	4.69	0	0	0	0	0	0	0	0	0	0	0	0	Uncharacterized protein			TAGAGCGAATTGGTGAACTAAACACGCTTTTAGAATTTAGACATGGCGCGCTAATTATAATTAGTAAGCCTATTTGCATTTGGCACATTAAGCCTCTTTGCACCGATAACACTGGTCGGCATCAAAATATGAACAAAACAATGTCTATGTGGAATTGATACATATTGACGCGCTATTGTTTACATTTCGATACAAACAGCGGTATTTGTGAACCTAAAGCCTCTCCCACACAGGTGCG
c36370_g0_i0	262	4.66	0	0	0	0	0	0	0	0	0	0	0	0	Uncharacterized protein			GCAAGATTTATGTATTAGATCTTATGGAATAAAGGCGAGACCAATATGACATTATTAAATGACATACTCTCTGGTGTTGACGAAACCCTTAAGTTCTTTCAAATTCATTAACCCATAGGGATTCAAGGTGCAATAAACAACGAATGCGCGGTTAACTTGCAACGAAACTGGAATTAGGAGACAATAAAAATCTATTTCATAATTTTACTATGTAGTCAGTGGTTGTCGACTCTGTACTCTTATATCTGCGCGTGAGCCGCGA
c6061_g0_i0	239	4.54	0	0	0	0	0	0	0	0	0	0	0	0	Uncharacterized protein			GGTGCATAGAGATTAGGCATGGACATCATCATCAACCGTCCCGCCTACGCAAGTTCATAGCTAACCTGCATCACTGCCGGTTCTAGCATCACGTTAAACATCATAAATATACATAAATTTCACTGATGTTGCCATATCATATTTTTCTGTGAGATAGTACTTCCTGGTAACTTAAACCAGCCTTCACCGGACCTTACAAGGTCATAAACGAGGCCTTAAGGTTTTTAAAATCATGGTGA
c10535_g0_i0	264	4.43	0	0	0	0	0	0	0	0	0	0	0	0	XP_013168065.1 PREDICTED: RNA-directed DNA polymerase from mobile element jockey-like, partial [Papilio xuthus]	7e-04	43	GGAAGCTTTACTTCTTAGGCAAGCTGCGTACAGGGCTTGGACCACGGTTCGTAAGACAAATGACCCCAAGGCAACTGATGGGAAACGCAAGTATAATGCAGCCTCTAGGTCCAGTAAAAAGGTTATTGTCAGACAATGTCATACTAGCTGTGGTCCAAGCCCTGTACGCGACTTTCCTAAGAAGTAAAGCTTCCTTGCATGATCGATTAAACCACGGTAGTTTGTTTGCCCCGGCAGCTGCTAGTGCGTTAGGAATAAAATATT
c32800_g0_i0	240	4.39	0	0	0	0	0	0	0	0	0	0	0	0	Uncharacterized protein			GCCTAGAAGGTGTCTGTTTACTAGTTCTAACCACCTTAGGTATTAGATAAAACTTTTACCAAATTAAGCGTGTATTTTTTATAATCTATATTATTTAAACTCTTTACGAAATTGTTTTGGGATTGGGGACAAATTTTTATTAAGTTTAAACACCAACAGTCTTTTTAACTGGATGTTTGTGATTTTTTATAAGACTAGCACAGCGAATTTTTCTTACCCGTAAAGCAGCAGCTAGTTGTT
c11162_g0_i0	240	4.39	0	0	0	0	0	0	0	0	0	0	0	0	Uncharacterized protein			GTGTTAATAAACATTAACGATATAAATAAAGTTTGGTGGTTTCAATATATTGCTTATAAATGACCTAAATAGGAAACGATATTCCTAAAAACTTGAATGATTGGGTAATTGTGAGTGAGCAGGTGGATACGTGACCAGCGAGCCGATCGCTGTCAGCCGCGGAACACGCGGCGACGGCGTAGATAGATCCACGCGCCCTCGCCCCTGTCACTGTGATCGGCGGGTATTGGAAATCCTGCT
c5842_g0_i0	341	4.23	0	0	0	0	0	0	0	0	0	0	0	0	Uncharacterized protein			GTATATTAATTGTCATGTTCGTGGTATAATTTTTCATTCTATCAAGTATTTTGATTTTTTATTTTTGACCAACGATTTGCGATTAGGTTAGCAAATCATTGCATTCCTAACATATTGGTATATTCCTAAAAAACTCTTCACCATCAGCGAGACGCGAGTAATCAATGAGACTGGGTATTATAAATCCAGCAGGTATTTTCAAAAATCTAACTTGATCTATTATCTCAACTGATACCTACCCTTTCAATTCCTAAATAGTGTCGCTCCAAAACCACCGTTCCCAACGTTTTGACACCACAAATCTATTTTAGATGCACCGAGCGCGCGCCGCACCGAGACGT
c70551_g0_i0	242	4.12	0	0	0	0	0	0	0	0	0	0	0	0	Uncharacterized protein			GTTTTATATTCCTTACTAGAGAAATTATTAATTCTCTATACAAACTTTCAACTTGAGGTGTCAAGAGACGATTTCCAGGAAAAAAGATCTAGCAGGAGTTTATTAACAAAAGTACATTTAAAGGAGCCGTTAAATTTCTCAAATATTTGTATGGCTTCTTAGTTTAACGAGACACGAGTTATAAGCCATACGAATATTTCAAATGCGAAGTAGCTCTGCCTGTCTTTTACCTTTTAACACAT
c11082_g0_i0	242	4.12	0	0	0	0	0	0	0	0	0	0	0	0	Uncharacterized protein			AATTTACTACCGTGGCTAAAAAAGATTCACTTCAAAAAGTTGCAACGACCAAAATAAGTACGTGCGTTTTCGCTATAACATGTATATGGTAAAATAAATAAAATGAATAATATACGTGTACTCTAGTAATTAAGGAATACTGTTACTATCCAATTAAACATATGTAAGAAACTAAGTTTCTTGACAAAGATTTATTATAATAATAATAATAATACATTGGACATCTCACACAGGACCATCTG
c6296_g0_i0	287	4.01	0	0	0	0	0	0	0	0	0	0	0	0	Uncharacterized protein			TTACAGACAGACACTGGAACAGTTGATTCTGAAAATGAAACTTTGTGAGAATATTTATCTTTTAACAGCGCCACCCACCGGTTTCCATTTTGAATCTAAAGTCTAAAATATCGACGGATTCATTCGATTCGATTCGACTTGCAACGAAAATCAAATATGACGTTTGGTATTTTAAAGTGTCTCTACTATTTCCAGTGGGTGTCTCGATCTATGCAGATAATCTATCACAGAGTTACTATATGCGTGTACCTTTAAATATACTCGATTAGTTAGTTATGAAGCAGAGA
c23349_g0_i0	243	3.99	0	0	0	0	0	0	0	0	0	0	0	0	ADI61812.1 endonuclease-reverse transcriptase [Bombyx mori]	1e-09	45	TCACCTTCGGTTTGCAGACGATATTCGAGGAGTTGATGGAGGACCTCAGTACGACGCCCGAAGACCTCAATAAAGTTTCTCAACGGGTTGACCTCAAGATGACAATGGACAAAACGAAGGTTATGTCAAATTCACATGTCGTGGCCACCCCAATAACAGCGGAGAACTCCAACCAATAACATTTATCGACGAATACGTTTACCTAAGCCAAACTTCGATTAGGCAGGTCCAATTTTGCGAGAG
c24446_g0_i0	243	3.99	0	0	0	0	0	0	0	0	0	0	0	0	Uncharacterized protein			TTATTCCTCCTACCTCCTCTTTGACTCGAAATATGCATTTCGTATCAACAATGTTGCAACATTCATCGGCTTTACTCCAGGTGTTATTTTTTTTAAGAGCTTCTAAACTCCTCCTGAATTGCTGCTTTCCACTTGTCTTTGTCCTTGCTAGATAAGGCTTCTTCTACAGTAAATAGATTTGCAACTTCGTTTGCCAGATATGTTATGTAATCAGGAAACGTTTTAGGTTTCCTTTCTCTTAAA
c57804_g0_i0	243	3.99	0	0	0	0	0	0	0	0	0	0	0	0	Uncharacterized protein			GTAGGTACATATTTCAACCTCCGTTTTCACCCTTCACGAGATGATTTTCGAAAAAAAGGACTTCCTAATGTTCAGACTCTTAAACTAAGTGGATAACAATATAAATCCAACTCGGTGTACCGGAGTCACAGGCTGGGGTCGGCCTCGCGCACGGACGGTACCCCGCCGTGTGATGTACACGCTATCGTTGCCGTTGTTAACATCGAACACGTATTTATTGTGAGCCCCTCCCCCGCGGCGCTA
c12136_g0_i0	243	3.99	0	0	0	0	0	0	0	0	0	0	0	0	Uncharacterized protein			CAATTTCATATGTAAGGACCTAACACCTAATATTAATGACGGTTAAACCAACGATTTGCTTGATTAAGTAAGGCTATCAGCGTCATATGCCATCACCATCAAATCAATACACAATACGGGTATGTACTACACGTAAATTAATATATTATGTACTTACCTCGAAAATAATAAATAATCACGCTGAGTTGTTTCTCATTTATATCGAATCTTGGGGATTCAAAATTCACTTTAATTAGTTCTGAG
c43137_g1_i0	269	3.93	0	0	0	0	0	0	0	0	0	0	0	0	Uncharacterized protein			CGCAATGTGGGGTTCCGTAGTTACATACCTATTATAATAACGCAGACTCGAGAAGAGGACTTTTGTTTTTTCATACTATAGTTCATTCGATAACTCTTTCTCCGTCATGAACTTATATCATTAACAGTTGTGTTATCTACCCCTTAAAATTAATGGAGACAAATCTATGATTATATCCAAATACTTCTACTATAACGGATGTCTTTTTTTCCTTTTTGTTGTGCCTACTCTCCATGCGTTCTCGAAAGACTCTGCATCGTCACCGGAGG
c31007_g0_i0	245	3.75	0	0	0	0	0	0	0	0	0	0	0	0	Uncharacterized protein			TGTAAAAGGATTTTTAGCTAGGTAAATTATTCGTATAATTTTATATTCGGTTTCAATTTTGTTATATAACAACAATTGAATTGGAATTTTGTGAAATGTATTTTAATAGCAACTCATATCCATCAGGTAATAAACAATATGACTTGTGTGATAATATCTGTTACTGGCAACAAATCGTTCACCAATAGTGTTAACCTTCTATTTGTTACTGGCGAAAACCGTAACTGTTACTGTCGACAACCGTT
c22503_g0_i0	246	3.64	0	0	0	0	0	0	0	0	0	0	0	0	Uncharacterized protein			ATAGATAAATCAATTTTAAACGACTCGGACGTCATAAAGTCGGCTTGATTATCCCAAACTGGTTGAACTTGTAACAATTGGGTCATATACTCCTCTTGAACTTAGTACACGTAGTGACATTTATGCATAACACATTCTTTTAACGTTTTCAGGGTTACATGTTTAGTTCTTAACGATGAATTGCTTTGTCAGAGATAATTTAATTTGATTATTTCGTTTATAGATTTCCTTCCCTGGAGTAAAGAT
c55073_g0_i0	246	3.64	0	0	0	0	0	0	0	0	0	0	0	0	Uncharacterized protein			GATGAGCTGATGAATGGTGTTACGTGAAATATAGCGTCGCGGAGCTTCAGCGGTGCAGCGGTTAGGCAAGGAAGTGCATGGATGACGTGTAACGAGTGCCAAGGTCGAGAGCTAGCTGACAACTGTCGTCGGCGCCCGCGACAATCAGTAGCACCAGCTGGCGCTGGTGTGCTCGCACCACGCGTGTGTGTGTATATGTTGCGTTACGCCGTCTTCGCGTGAACAGTGCGGTTCCAGAGGAATTTC
c6227_g0_i0	295	3.46	0	0	0	0	0	0	0	0	0	0	0	0	Uncharacterized protein			GCGACGAAACCCGTCACACGGTGTTGATCGACACAGCGACGAAACCCATCACACATTGCCCACGACCTCACTTTGTGAGCCTCTCCAAGGGTATGACATGCGTATTCATACTCCCCTGAAAAGATCTAACCTTAAGTAAGAAAAGAGCGCTGACAAATAATACTCAGGCTAACCAATAATATCTACTTCGAATTTTTAGTAAGTAGAAAAAAAAATCGTAAAAATTGCATACAAAGTTGACCAATAAATTAAAACTATTATTGAATTATATTAAAAAAATAATAACGGAACCCTA
c40711_g0_i0	248	3.42	0	0	0	0	0	0	0	0	0	0	0	0	ADI61817.1 endonuclease-reverse transcriptase [Bombyx mori]	2e-09	85	GGCTACCACAAACGATGACCCCTGACCGAATGAGAAGATCAAAGAACTCGAGGAAGGATTGAGCAAGCTTAAATGGGATACGTGATATCTTATTCTTCCAATTACCGCAGTGTCTAAGACGAAAGTTTTTGACCAGTGTGTGTTGCCAGTCATGACGTATAGCACTGAGATGTGGTCGCTCACGATGAGCCTCATAAGAAGACTCACAGTCACCCAACTCAAAAGGCAATGGAGAGGGCTATACTCGG
c29762_g0_i0	248	3.42	0	0	0	0	0	0	0	0	0	0	0	0	Uncharacterized protein			GCACTGACTAATACTAAAAATCTGGAAAACATTTATTAAGTTTCATTTCTATGTTAAAAATCTATGCCCAGTTTGTTAGCTGGTGGTGGATGATTCATTTTAATAAATCACAGATGCATGGATTGGATCCCAATGGATTTGAATAAAATTTGGAGATAATAATTTATGGGATATTATTTAGGAAATAGGTATTGTTTATCAAGAAACGCTAATGTTTTGCTGAAAAAATTTGTGGTAGCCTAGTGGTA
c29435_g0_i0	276	3.35	0	0	0	0	0	0	0	0	0	0	0	0	KPJ04096.1 Threonyl-tRNA synthetase, cytoplasmic [Papilio xuthus]	0.028	56	TTAGAAGAGATTCTAAAAGCTTATATGAATTTCACCAATCCGCACTGGGTCTGCGTGGTGGACTATGGCCTAAATACCCTCAGAGTAGGGTAGGCGTGTGCCCCTGCAGTGGTGATGTATAAACGTCTGATGATGAATCTTAGGTCGAAATAAAAAATATTAGTATTTTTTTACCATTAAGACAATAAAAATGCTTCCAAAATGTTCGTTGTCTTTGTCACAGTCCAAGCTAAACTGGTGACACGAAGAAATATCCAGGAGACGTATTTTTGAAGC
c17209_g0_i0	276	3.35	0	0	0	0	0	0	0	0	0	0	0	0	Uncharacterized protein			AGTACCGGACGAATGGTTCTCCTGGATTTTAAAACAAAAATTTTTAATATAAGTTAGGTTTGTGATATCGTTTCTGAATTTGTAGTACGAATTGCACTTTGTATCTTATACAACTTGATGTGTCATCACGCGCAAGGCCGTCTGAGGGTATGAGGCTCATGGGCTTTATGGATTTTTGGCCTCATTTGGTAATAAAAAGTAACATATTTCAATTCAATCAAGCTAAGTTAAAAATTTGGTGTGGTGTCTGTGTCTGAATTACATTGTCAAATGTCG
c8928_g0_i0	249	3.32	0	0	0	0	0	0	0	0	0	0	0	0	Uncharacterized protein			AAAAAAATTGTTATTTTTTTTTGTTTTTTCCATATAATAAATCGATTTCATATGTAAAAACCTAATAAATATTGATAGATTTTATGTTTTATGTGTATGTCTGAATTATTTTTCGAATAAAATAAAAGGCTTATGAATGGAATACATTATCGTCTATTTTTCGTTTTGCTAAGTGCAAGCGGTTGCTAGTGGTTCTGTGAACTGTAGACTTCGGAGCAACTCCTGAGTGCATTTAACGCAATAACAAAA
c37985_g0_i0	251	3.14	0	0	0	0	0	0	0	0	0	0	0	0	Uncharacterized protein			AAAACTCCAAAATGTTAAATTAAATGTCAATTAAGTTCCAACTAACAAGTAACTAAGTATAGACAAACGGCAATAAATTAGGGAAAAAATTAACAAACATATCCTTTCCTTTTTTTGGGACTGTAAGTGCCATTAGAGTAGAGTCTACTTATAACAAAGAGTTTTTATCGTGTCGCTTTATCTAGATTATTCTATCTCAGATCTTAGATATCTTAGATCTAGATAGTGTTGCTTCTAACCAGATTTTTTGG
c41867_g1_i0	252	3.05	0	0	0	0	0	0	0	0	0	0	0	0	Uncharacterized protein			TGGTGACAAGGCTTGTTTCCATTAGTAGCAGAACAGAAGGTTTAGCATGGCCTGAATAGGGCCTGAGTGGTGGTCAGTTCGTCTGTGGTGTATAGAGTAAAAGCGGGGGCTGGCTTCAGGTCATCTGTTTTTCGCTGTTTAGGTATCAGGATATGTGTGAACCCGATTTCGATCCACTCACTGAGGTCACTACACTTTAATAGAATATAGATTGCAGTTTGTGCCCGGTTTCGCTCGTGGAATTATTGTAGC
c7385_g0_i0	341	3.02	0	0	0	0	0	0	0	0	0	0	0	0	Uncharacterized protein			GTTCAATTGTCCCCGGTCTCCCCTAAGTAGGTAACTATCTAGGTACCATTTTAGCATTTATGTGTAAAATTTCCTACGAAATTTTTTGGCAAGTAGATACTTATTTATGGCTCTCTCTATCTGTGTATGGTAATAATCTACATAATCGATTGTTATATTCTTGCTATAACTTCATTTACTAATTAACAGAATAACATACCAGTATACGCAATCTTTTTAAACTCGCGGATTGTCGCGTTTTGTGCACATTTTAAAATTAAATATATGGACTTAAACGAGTAAATAACGGTCATTAATACCTTTAGTATTTTATTCGACGTATCGGTAGTATCCAATCACTG
c19729_g0_i0	281	3.01	0	0	0	0	0	0	0	0	0	0	0	0	Uncharacterized protein			GGAACACTGTGCATTTTTCTTCACTTTAATGTATACGTACCTATAGTAATTGTTTATAATTAAATATATATGTAATTTTTATACAATTTATATATAACTTGTGATAACTACTATTATATACATGTATTTTTAACTTGTAAATAAACCCATGTTCACAAAAGATGGGCACCTGCGTTTTATGTAGATTTATTGAATTAGAGAATGTTTTAAAGGTTAAATTACATTATGTTTTATAATATTGTTAAAAAAAGAATGTTGGCGTTTCATAATGTCTGTATAAT
c69226_g1_i0	253	2.96	0	0	0	0	0	0	0	0	0	0	0	0	XP_034841116.1 multidrug resistance-associated protein 4-like [Maniola hyperantus]	1e-16	68	CCAGTCACAACTGGCAATTCCCTTAGCAGAAGTTGCAAAAATGATGATTTACCAGAGCCGACCGCACCAATCACTGCATATAGTTTGTTTCTACGAATATGAAGTGAGATTTTGCTTAGAGCCAACGTATTTGAGTCACCAGTCCAGCTCGCAGTCACACTATCTACCTTTACTGCGTAGTCTTCAGTGCTTTGATACAAAAGCTTAGGGTGTAGAACATTAACTCTGTTTGCAGATAATTCACTTTTCTGGG
c62718_g15_i0	253	2.96	0	0	0	0	0	0	0	0	0	0	0	0	Uncharacterized protein			ATGTCGACGAATGACATTGACAGGCACATAGATCTTTATAACACTTGACACATACATTCTGGCTTGTTATTAATTTTTGTTTCGTTTCATGCAAATTATCCGTTTTTTTTAAATCACTGAGTAAATGTTTTCCGGTAATTCTAATTTTTTTGCGTGAAACGAAAATATTGAAAGGGTTGTTCAAATTTTTGTTGAATGTTTCAAAAATACGAACAAACGAACGAAAAAACAATAGAAATTAAATTTGCACCTA
c18505_g0_i0	325	2.93	0	0	0	0	0	0	0	0	0	0	0	0	Uncharacterized protein			GAAAAATCAATTTCTGGTTTTTAGTTTGGCTAGCTACAAAAGCTTCGGCGTATACTACGGTTTATTTAATAATGGTAAGTAAAATATTAGTAGTTGGGCCAACTGTTGTATTGATTTACTAATATGAATAAATTACTAATAATTTTGCGGCAGCGCGTAAAATATTAACTAAGAAAAAACTATTATCTTTTATATCTGAGTCGTGTTCAACTATGTATGTACTTAACTTCGTTTCGATGTTAATATTTATGATTGATTCTAGGGACCAATCATATATCTATACGATTGTTTAAATAACAGATCGACATACGTACTAAATTAGGAC
c47040_g0_i0	284	2.84	0	0	0	0	0	0	0	0	0	0	0	0	Uncharacterized protein			GCCATTATCTTTTTCAAATAACAAACGAGCGACTCGCGTTCAGCGTACACCCCGTCTAGCGGGTGGGAGATAAGCAACCGGCGCGGCGGCAATGCTGTTAAGCATCTTATGGACAGCTTCGGCTATGAACATATAGTTGGGAGAAGCACACCAAAGCACTGCCCTTCATTAAGCACCTTCAATTAACTGCCGACTGCTGAAATCAATTTATCAGATCCAATTGGGACCCGAGATGATCGCGTCCAAGCTTTATGTAATAATCCTAATATCCTCACCAATCCCGT
c82362_g0_i0	255	2.8	0	0	0	0	0	0	0	0	0	0	0	0	Uncharacterized protein			AAGCGCCTACTAAATACAAAAGTAGGTACATAAAATAAATTACAATTACTTTAGTAACTATCTATGATAATGTATGCATTGTGTAATCTCGATTAAAAACTTAAGATGACGCATAATAATGTACAAAATACAATGTACAATTATCACTTCTAAAAAGGTTTTTTGTCCAAAGACTTCTCTGTATATATTCTAACTAAATATATACAAGTATATAAGTGTATCCATTACTGAAACAGCGAGGGACACAATATGGTG
c27674_g0_i0	285	2.78	0	0	0	0	0	0	0	0	0	0	0	0	XP_021181510.1 cytochrome P450 6B6-like [Helicoverpa armigera]	2e-37	71	TTCCGATTATTACTGATCGTGCAAGAAAATTGCAAATATTTATAGAAAAAGAAGCTTCAAATGATGTCTACGATGTAAGAGAATTAATGGCAAGATATACAACTGACTTTATTGGTGTGTGTGGTTTCGGCTTGAACTTGGATTGTTTAAATAAAGAAAATTCTCAGTTTAGAAAGCTCGGTAAAAGAATATTTCAAAGATCGCTGCGCGATGCTTTAGTTGCAGCGTTAAAAACAATATTTCCTGAGCTTTTCAAAAATCTGCATCTTTTGTCACCAGAACTTG
c9586_g0_i0	286	2.73	0	0	0	0	0	0	0	0	0	0	0	0	Uncharacterized protein			CTTAGTTCTTATGGAATAGACACCAAGGAAATTCTTGACGCAAAAAGATATTAAATTTTTTTGTATTACTTGAAGATAGATGTCGAAAGCGTGGGTATCAATCACTAGACTAGGTTTCGTGTAATGATATCACTTATGTGAAACATGAAGATGTGTATAAATTAAGCGTAATTAACGAAATAAATACGCCGTGCCGTTAAATAGTATGGCGTTATCTAATGTCACGCTTGTTGCCGTTACTAACCGAGGGTATGTGTGTTGCAGCAACTGGGCCTGATCCACGCGG
c36106_g0_i0	257	2.65	0	0	0	0	0	0	0	0	0	0	0	0	Uncharacterized protein			GACAGGCCGCAAGCCTTTTTGCCATCGTCGTGCTATAAAAAAAAATGTGAAACGTATATTTTGACGTTATAATAAGTACCTTCCTATATTTTATTCCAGACAATAATCTTTACATTTTTACCAAATTTCATCCAATTCCGCTCAGCCGTTCAAACTTTTACATTTGTAACATAAGCCAGGTTTTTTATCATCTATTTGTATAATATTTCTAAATTTACATAATTATATTCGCTTATCTAAAAATTCAATTGTGAATT
c68189_g0_i0	289	2.57	0	0	0	0	0	0	0	0	0	0	0	0	Uncharacterized protein			GTATACAACATCGTGTTTGAATTTATATCTGCTCAAAAATCAACAGAAGTTAAGAAAGTATCTTTGGAGGCACATCGCCGATTACAAGGTCGTCTGTATTCCATTTTAAACGCCGGATTCTTTTCTTTGTTTCATTTTGCGACCGAATGTTTTGTTTCCTAAATACAATTTGTTCTTAATTAAAATATTCGTTCGAGATCTGACGGCGCGCAGGGTGGGGGTGCGGGGTGGCGGGGGTACTCCTGTGTCTCGAATATAAATTATAAGCCCGATGTTACCCCCTCAGGGG
c6119_g1_i0	336	2.57	0	0	0	0	0	0	0	0	0	0	0	0	Uncharacterized protein			TATTTGTCTCTTTTTAGTGAAGATTTCTGCTTTTTTCCGTTTCAGTTTCATCGAGTTTCAAATCACAAAAGGGCTTAAGAAGTTACAGCAGCGATGTGACGCATAGGTACTCTCGAACTCGCAGAACGATGTCGCGAGCGGTGGCTGTAATACCCACCAGAAAAAAATACAAAGTAAATAATGATATTACGAATAGTAATAACATTTTTAATCGGAATTCAATTAACTGTAAATCATAGTAATTTATATAATTTTTGTTATAAGTATATTTCACTTATTTATATTTTATAGTATCGTATAATTTATTTTAAAGTTTTAATATGATAAAAATTAAAC
c7391_g0_i0	290	2.53	0	0	0	0	0	0	0	0	0	0	0	0	Uncharacterized protein			GAGGTTGGTTCATACAAAATAACATGACAATAATCAAATCACATAGGAAGTTGCAGGCGTGTTTACGAAATTTATTCGTAAATAGCAAACTATGCATTCTTTTTTGTAATTATTTCCGCACATATTTGAGATAAAGGTATTATATATATTATGGCAATTAACGCGTTTAAGTGATGATTTGGTTTAAAAAAAAGGAAAACAAAAGTTCATAGCTTAGTTTAAATAAGTATATAAGTGAATTGGGCCCCAGTATCTATATAAATTTTGCAATAAAGCCACGCCAAACAAAG
c79599_g0_i0	259	2.52	0	0	0	0	0	0	0	0	0	0	0	0	Uncharacterized protein			TCGCAGGTAAGCTGCCACTGCCCTAAAGAAACAAAATTAATACATAAACAAAATCTAATAAAGTGCAAATAAATTTAAATATAATATAATATTTAGGTGATGACGGTGAAAAGGTTAAAAAATATTTTTAGTTAGAAAACTGTGATTGAAAACTAGGTTGGTTGACCATACGAGTTACGACATACATAACAATAATAACTTGGTTGAGATATCAAAAAATTAAGGCTTAAACTTATTGAATACCTGTCGAATATCCTGG
c17271_g0_i0	361	2.47	0	0	0	0	0	0	0	0	0	0	0	0	GBP82816.1 Serine protease 33 [Eumeta japonica]	7e-32	95	GTACATTTCAGACAAAATATTTTTTTAATTATTTAATTCTGAACCTCCAAGTAAGAGTAATAAGATTTTCTCTCAAATACTTATCTTATATTTGAAAAATGACAATTTTTAAAGAAACTTCCAATGAAAATTTTCACATATAAAAACTTAATTGGTAATCTACAGGGTGGTCGTGATTCGTGTCAGGGTGATTCAGGAGGCCCTCTTACATTGAAGATCGAGGGACGAAGCACCCTCATAGGGCTCGTGTCCTGGGGCATCGGCTGTGGCCGGGAACACTTGCCTGGAGTCTATACCAACATACAGAAGTTTGTGCCTTGGATCGACAAACTTATAATTTAAAAATTCATATCATACACAA
c32557_g0_i0	260	2.45	0	0	0	0	0	0	0	0	0	0	0	0	Uncharacterized protein			TTCTTCGGGAACCATTGTGTGTCGCTTTATATAATTTTTTTAAATACCTATATAATATCTTTGACTATTTATCGAAGCATGGACGCAGCCAATCAGAGTCGACATTGCGTGATCGGCGGCTGTTGTTATTGGTCTACACCCTCCTACCGAACGACAAATTTTTTACTCTTTTAGTATCTGCACGCGCTTGTTATTGTACAGAACTAAATACGCAATTACTAAAATTATCAGCAAAGAACATATAGTTTCATTGGTTTTAT
c79618_g0_i0	260	2.45	0	0	0	0	0	0	0	0	0	0	0	0	Uncharacterized protein			TTGTACCATCATGTACTATTATTCAAAACACAAAATACTTACTAAACTAAATACTTACAATTTTTTTACCTAAATCAGAATAAAGGTACTTTTATTACAAAAGTCTTTTTAAATAAGGCACAGGCGACAGCAGACATTTATTTTAACATGAGACTTACGTATATTGAGAATAAACTTTAATGAAAATCCGTAATGGACCTAGTACCAAACTTTGACTTGTCATTAAAAAAAAGCGCGGAACTCCACGCGTCAGAAGTGAA
c45067_g1_i0	271	2.43	0	0	0	0	0	0	0	0	0	0	0	0	Uncharacterized protein			CAATGTAATGTAATAATATTATGAATGAAAATAAGTCTTAGAAACACTTTATTAAATCTTCGAATCGTAAAATAGTCTACTTACTAAATTAGTAACGATTTTAAAGAGTGCATTTGTTTCAGTGCAATGCTTAAGTACTAAATAATTAAAATTATCATTTCAAAAATTTACTAAAAAGGTATCTTAAAAATTATTTGGCATTAAAAATAAAAATTCTGTTATGATATTGATGAATATATTTATAGAAAAGCTTCATTCAAACTCTTTAATT
c30390_g0_i0	318	2.41	0	0	0	0	0	0	0	0	0	0	0	0	Uncharacterized protein			TTGTTTCACGTTACAATTAAGACACTACAGATAACTGGTCAAGTGCATATCGGGCCACGCGCGATGTCGGGTTTCGTCGTTGCTCATCACAGTAATGTTCTTTATAAGAAGATGGACTATTACTCGAAAACTTGTAAAGTCTACTTAGCCGTGATTGATTTCCTTTTAACTTTGTTATTTAAAATTAATTGTAAGATTAATTAAAAAAAAAACTGTTTATACCAAATTTAAATTGAATACGTCGTCTAAATCACCGTCGTGCGATAGAGTCCCCTGGCGATTTGCGGGGCCCCGTTGTATGGCAAGCTTTTGGGAAAA
c9311_g0_i0	261	2.39	0	0	0	0	0	0	0	0	0	0	0	0	Uncharacterized protein			ATTCGAAGCTTGCGTTCTCGCCGGCTGAGAAGTTATAGTTACTTATGGTGGGAGGGGTTCGTACGAAGTTCTTAGGTCATTGAAGTAGAAATGATTTCTTTTAAAAAAGTAAATGTCCTATGAACTTCATGGGTCATGTATGCGTTAGTGTAATGTGTTGTGTAAGTTAAATTTTCTAAAAGCGTATATACAAGCACTATAGGTGTATCTACTTTGTCTTATATTTTGCCTACTTACGTTCGATGTCTTGACCCTGTAGAT
c48310_g1_i0	261	2.39	0	0	0	0	0	0	0	0	0	0	0	0	Uncharacterized protein			ATTTGAATAACATAACATATGAAAGACTGTCAATTTTTATTGACCCGACTAATTTGCCTTCACCGCGCTTGTCTATACATAGAATCATTGTAGAATAAGGTTTACATTTTTTGTTCTATATCACGAATAAAATCAATGTCAACATTTAATTACGTAACTATGAAAATCTCAATTATGAGAACAGCTTTTTTAAATCAATATATTTCTCGGCATCATTATTTCTCAAACTATTTTATAGCTAGCTATCTAGCTATTTCTCGG
c6127_g0_i0	294	2.35	0	0	0	0	0	0	0	0	0	0	0	0	Uncharacterized protein			CGGTAAATAAGGTAGCCAGAGCTCCTGAGGGTGCACTGTTTTAACACTGAGGGACCAGGATTGTGCATAATACAGTAATTTTCCAGTATGGGCGCGAAATGTGGGTGCAGCCAGCGGTCAGAGCTACCCAGTGAAACGTTTCGTACTGCACTGATAAACTGCACTACCCACGCTCGCCGTCGGATGATTTTGCATATTTATCCGTGTAGCGATATAAGAAATGAACGTATACGGTATAAGTACGTATACGCTTCGGCGCCTGGGTCAACTTCGCGCACTGAATTTACACTTTGG
c53016_g0_i0	262	2.33	0	0	0	0	0	0	0	0	0	0	0	0	Uncharacterized protein			CGTACTCGACCAGGTTTCAATCCTATTCTGAGGCCTTCCTCAGAAGTCAGACTGCGGATTTTCGCGCGTTATTCGTATCGAAAAAATTACTAAAAATTTGTATGCTAGCACAAGTGATATAAATGGGTATATTTAAATCGTGGTCAATGAGTTGACTTTTTCCAAAGAAAAACCTCTAAATCAGTGAGAATTGAATCATCTAAATTGTTCTTGGCTCTAAAGATGTATAGGGTAGGGCTGGGCTAGTTGAGCATAAGGGTAA
c8441_g0_i0	262	2.33	0	0	0	0	0	0	0	0	0	0	0	0	Uncharacterized protein			GGCCGAACGGACGCACGGTAGTTCACGAGAAGCGCGTCTCAGCGCCTCATTACATTATTGGTCCCTAGATTTACCTGCACGTGCAGATTCGACCGCACCACTTGTATTTCCACTATAACATGTTTAACATCCAAAACGGTGAACATTAAACATATAATAGAGTCGAGCCGTATCATCGTAATATATCCGAACAAGCGCAATATGCCAAGTTTTTGCACTGATATGAAGTATATGTTTCAGAAACTGGACATCAAAGAAGGGG
c5710_g0_i0	262	2.33	0	0	0	0	0	0	0	0	0	0	0	0	Uncharacterized protein			GGCGGAGATTAAGTAATCTCTGGGATCGGGAAATCTACTCACCTGCGGATAGCCAGCGGACAACCGTTCACCGGTTCTCCCTGACCGCTGCACCCACACCGGCAAACGACTGTATTGTCCGCAACGCTAGTCCCTCGCTGTGTCAACACAGCACATTTTCGGGAGCTCTGGCTACCTAACTTACCACAGCAACATAACACTACGTAAGAGTAATATTATTTGGCTACGGTCTTCTGTGAGGCGGAAGTACTTCCCCAGTCGG
c11884_g0_i0	322	2.29	0	0	0	0	0	0	0	0	0	0	0	0	Uncharacterized protein			TTTTTTATTTTTGATAACAAACAAAAAATCACGCACTTCCGAATCGGGCCTGCAAGCTCTAAGGATTTACACTTTTAAACTAAAGCCAAAGCGGAGCTAATAACACATAACGGGTTTTTGACACGATAAACATGCAAACTAAACGGTCTATTTCATGTTACCAAATTAAAGCCGTGAAGGATCAATCAATCAGGTGTTGTGGAACAAAATACAGTCATTGGATAGAACGACAATACATTCCCCGGCTGGTGAAATAAGCAATGGCAATCACAAGATGTAATAATTTCAATACAGAGGATGGTTTCAAATTGTCAAGTACCTA
c49479_g0_i0	263	2.27	0	0	0	0	0	0	0	0	0	0	0	0	Uncharacterized protein			GTGATGTTGCAGTATAAATGGAGATATTATAAATATTGGACATGTAGGTACTGTAATTACTCGCCATTCTTCGATTTGTAACTCACAGAATAAACAGCATGTAAATGTTAAATGGATTCCGAAGACCATAAAAGTACTACCTTATATTGCCAAAGAAGTGGCGTATCAACAAATTTTACGTTTTACCTGATATGTCAATTAGATTCTAACGGGTTCCAACTAATTCAACCTTCACAAAGAGTAATACCGAAAAATATATTAAT
c19218_g0_i0	263	2.27	0	0	0	0	0	0	0	0	0	0	0	0	Uncharacterized protein			GACGATTATGCAGAGCTACTTCCGGAAATTCTTTTTAAGCGGGTTAAATATAACGAGTCACTAGAAATATATTATTATGAGAAAATAAATTTAATGAATAGATGCGAGATACATGGTAAAAGAGCGGTCGATTGCTTACTTCACGGTTAAGACGATCGGTCTGTTAGATTAGGTGCTAAAGCAGTGAAATGTCAGGAACCAGAACAAGTGTTAGAATATTTTCAGTATGTCAAACAGCATCCACGTGAGTCAGATAAGAACAA
c6312_g0_i0	348	2.24	0	0	0	0	0	0	0	0	0	0	0	0	Uncharacterized protein			TTCTTCGACACCAGTTCCTCAGGTTGATAAGAGTAATAATGAATAGTCTGTACCTATTATTATCAAAAAACCACTCCTTAGGGATAAGTGGGACGTACTATCTACTCTACCAGTGTAGGACACGTTAGTAAGGGCAAGTGGAATGCCAAATTTATGATATAATAATAAAATATAGGTCTGTTATCGTCTGTTGTTACTACTTAAATTTACTACAAGGGAAAATTAACTACGGTGGTACGAATGGAATGGTTTTATTGAATTGCGTTAGTTCAACTACTGAGCTATTTTATTGTTTTTTTTTTACGCTATTATGAAATTATACATAAATTAGAATTTTCAATTTTTATT
c70964_g2_i0	324	2.23	0	0	0	0	0	0	0	0	0	0	0	0	Uncharacterized protein			GGGAGCCTAATCTGTGTGCTATGTCGGTGTTTACTATAGTTGATATACGATCGTCCGGCCTGAACTGAACTTAATTAAATCTCGAGCCTAGAATCACAAGCAGTTTCAGAAATTTTTAACCCTTATGTTAGTAACCAACTTTACCGACGTCTTTTAGCAACCGGGTACCCACAGATCTAAATATTAAAAATTTTGTTTATTTTGTTTAAAAAAAAATTCTAAACATTTTTTTCTTTAACTATGAATAGTTAGTGACAGTTAAACAAAAAATAAAAATAATACTCGAAGTCAACGTAAAATAAAAGACAAGGCAGCTCCAATTCG
c8515_g0_i0	264	2.21	0	0	0	0	0	0	0	0	0	0	0	0	Uncharacterized protein			GCTGGTCCACCAGACACTAACCAGCACATTTTTTTTATTTGGGGCAGGATTTGATCACTTCTTTTGGGATTAACCTTTTTATTACAAGTAATAAATACATACGATTTTAAATACGATTCATACGATTCAAAATCACCTGTTTATTGTTACGGTGAGTAATGTGATACAGCAATCGTGTTGTTGTTATTTTCGTCGCGTGTTTGCTGGTTTTCTTCACTTAGTTGATGCGATACCCAATTATCAAGCTTTCTCACTTTTCCAATT
c6309_g0_i0	298	2.19	0	0	0	0	0	0	0	0	0	0	0	0	Uncharacterized protein			TGGACTTACGTTATACGAATACATCTCATGTTTTCTCACTTGCACCAAGTGCCGCATTTTCACGTAAAAACATATTACATATTTTATTTTCGTCGTATTACAGTGAATTTCCGACGAGTTTTCAATTTGAATGGTAATAAAAGACTGGGAACGTTAAGGCCACAGTAATTACTTTAGTAAAAACTAAATCTTTTTACAAAAAATACATTTTGTAATTCGTATAAATCGTGTTATACTAAAAGTTTTTAAGTTAAGACAAAAGAAAACTATTTTTCTGCAATTAAAGTTTATGTAAGTG
c6054_g0_i0	375	2.18	0	0	0	0	0	0	0	0	0	0	0	0	Uncharacterized protein			TTGGAAACTAGGCCCGTAAGAAAGTAAAATTGTGGAAAATTATAATTTAGCGAGTGAAGCCGCGAGAAAAATATAGTTTGAACATTAATATAATTTACATTGACAGAATTACCATAGCATTTAATACAAATTTGTTTACGATTATTTTCGTCCACTATTTTGACCAAGCTGTTGACATTTCGTTATGAATGGTCATAACATAACGGTGCATAAAGATTATTATATATCTATGTAAATATTTATATGAATTCTTCTAAACGAATTTGGCCCAGTGAAATTGGCTTCTGAATTAATGTTTTTTAAATGTTCCATGGCAATTGGCACTTAATAATAATGACACAAATGTGATATAAACATGAACTTGGCTTGTCGGAG
c9455_g0_i0	326	2.17	0	0	0	0	0	0	0	0	0	0	0	0	Uncharacterized protein			GACATTTTTAGATTATGTGCCTCATTACGCATATATATAATTCATAATAATTAAATTTGTATATTATTTGTGAATAGTCAGACTAATATTTAATTTAATTTAAGTAGTGTAGGATACTAGAAGTTAGTGCTTTCCAGTCACTACTTTTATGTTATCCTTTTATTCGGGAACCACAGTAAAATATCCACTATCACCAACATGTGCTCTTAATATGAAATCAATACAAATTTTCCAGTTTTGTATGCAGATTCCGTAAGTATTTTTTATTATTTAATGTTATATTTTTTATTTAAAAAAAAATCAAATTGGCTTACATTTGACCACAA
c81362_g0_i0	265	2.16	0	0	0	0	0	0	0	0	0	0	0	0	Uncharacterized protein			GTCAACAAATTTAAAATAATAATTGAACGCAAGCTGAATAACATAGCTGTACAAGCATATTACACGATAGCATTTAGACGACTATCTTGAAGATAAGATAGCTTGGCAATTAACTGTTGTAAAACTACATTTTAAATAAAACACTGTTTTACATTAGACATTAAGTACAAGATGACAGATTCCGGAGTTTCTTAACCGTTCTTCTGCGTTGGGCCGCGTTCCGAACAAACAGGAGATCTTATTTTTACGTGTACAAGTGTTCATT
c22689_g0_i0	265	2.16	0	0	0	0	0	0	0	0	0	0	0	0	Uncharacterized protein			GACGAATCCAAAATTAATTATATATGAATGTTTTTTTCTTTCGACTATATTGAATTTGTGGATTCTGTGTGACACTGGAATGGTTAGTTTTCTACAAAAAAAGTATTTTATGTAATTTAAATAATAAACTATGTATAGTAGGTATCATTGTAGAATATTTAACTATATTTTTTTTCTTCTATATTACTAAAAAAATTGAATCTGAAACTTAAATATTTTCACAATATTACTTTTTAGTAATCTGTGGACATCGTATTGCAATTGA
c20583_g0_i0	300	2.12	0	0	0	0	0	0	0	0	0	0	0	0	Uncharacterized protein			TGTCAACAACTCAAACTGTTACACACGTCGCAACTATATTACGCATATTAAATTACATAATCCTTACAATGTGCGGCTTTTTGACCCTATCGTACGATGTTAACGCGAATTTGTTCAAAATGTTAACGAAAATTCTTAGTTTTGTTAGTTTTACAAAAAAGTTCATCTTATCAGTAATTCCTTGTCTATATTAAATACTACATTAAAATAAAATTTTAAGTGGTTTTACTGGATTTTGTTTAGCCGGGTTAATTTGATTAGTTCCTGTAATATTACCTGCATACTCCCTAATATCACTGA
c74973_g0_i0	603	2.07	0	0	0	0	0	0	0	0	0	0	0	0	Uncharacterized protein			TTGAAAAATAAAATTACATTTAATTAAAGTTAATGGCAATAAACGTATTCTCACTTTTTATACGTCCCATGTGCGTAAACGATTTTAGGTAACGCTGCACAACGATACTGACGGATTAACTTATATACAAATTTTGCAAAGTGTTGTCTATTGAGAAGATGCATTCCAAGCATGTCATATATTGTTACCTTAGGTCTACGCCGATAAAGAAATCTTACGGGGTAAAGCCGCGTGAGACAGCTAGTATACTCAATAATAGTGTGAAGTTCACCGTTCTTAGCAATTTCTTAGAAATTAATTCTTATCAATATCTTTTTGTTTTAAGAAACTTCGTTTTAACAATTAAATAAATCTCGAATCATCTGCTTTATAGCAGAATTTCGAAATTTTTTTATTAAC…
c6268_g0_i0	303	2.02	0	0	0	0	0	0	0	0	0	0	0	0	Uncharacterized protein			AGATGCTACATTTAAGATACATAGAGAAATGGCCGTTGTAGCAGATGATTTCTAAGGTACCGCGCACCGGAAGGCAGACACAAAGTGGATCGATCTGGTTAACCTTATGGATGCAAGAGGCACATAATCGGGTGGTATAAACTTTGAAACTTTATCCAGGAGCAAATCTTTAAGAAGTACAGTCGGCTACAAAAAATTATACACTTCAACCATTAAACCGTCCGCGCCTAATTGTATACTAAGATAACCTGGAAATGATCTATAATACGTGGTCATCTGTACATTGAATAACGCTGGTGTATC
c40210_g5_i0	268	2.01	0	0	0	0	0	0	0	0	0	0	0	0	BAA21826.1 transposase [Attacus atlas]	2e-04	61	TTCCAATTGTTGGCAATATATCTACTGTTATCATCTGACCAGATCTTAGGAAGGTGTACTGGATGACCAACGCTGGTCCACACGACACTAACCAGCACCTTTTTTTGAGTCTACTTTTGGAATACAATAATTATGTATTTGGCCGGTTCTCCTGGGCTTAACCACTGTGATGAGAGTTTCTGATTTATATAGGAGCTATATTTCATCGCAAGTAATTATACGATTCAAAATCCTCTTGTTATTGAGACGCGTGTTTGTTGGTTTTCTT
c11057_g0_i0	268	2.01	0	0	0	0	0	0	0	0	0	0	0	0	Uncharacterized protein			GAGACTATATCGGACACAGTTAAGGGATATAATACCTTCTTTCGCTGGACATGGAGCGAATTAATTAAATTGGATATGTTTGGCAGAAAGCTAGAATATTGGACTCCACCCCTCATTGTAGTGGAGCGGAGGTGGTACGTGGGTGGCAGGGACTTAGGATTGGTTCGAGTAGTGGTGCCGGGCGTGATGCGGGCCGTGGTGTGGTGGTGCGGGCGGAGCTGGAGTCATCCCGGCGAGCACGGTACCTGTGCGACGTCTTTGAGGCGGG
c52513_g0_i0	375	1.98	0	0	0	0	0	0	0	0	0	0	0	0	Uncharacterized protein			GCAAAGTAGCACTCATTGAGGCTGAAAGCAACCATTTGGTTGTTTATTTACCGTCGCAAGTAAACATAAGGCATCAGCCAACCATACAGTCACATTATCCCCGTAATACATTAACACAAATTACATCCGTATTTAGCGCAGTCCCTTCATGTCAATAATTGATAAATGACAATTAACAATATACGTATACGCATGGCGCGGACGGCGCGGACGTCGCCGCGGCGCACTTCGCCCGGCGCAGGCGCAGTCCGCCCGCACGACGGTACGTCACTACCTCCCTCAGAACAGAGCGTACAATATTGTGTAAATATAGACACACAAAACACAGAACCGAAACACGAGGCGCTCTAAACCATATTCACATCAACATAGCTG
c13740_g0_i0	361	1.97	0	0	0	0	0	0	0	0	0	0	0	0	Uncharacterized protein			TTGGGAAATAGTCATGATAATGGGAAGTCAATTGTAGACAAGATATCAAACTATTATAATTACATTGCGATTTGCGACATGCAAAAATTTTAAGCGATGGAGAAAAATATCTTTAAAAATCTTATAATAAGCCCGCAAAATTTAATTCACAAATTTTTTTAACCACTACACTATAACATTCTTAACCGTATTTTACATACAACCCGAAGAAAAACACTACAATAATAGAAAAAGCACTAACGATACTATGACGTCAGAACGAAACTCCACGAAACCTCATTCGAGCGAGGCTGAATGAAAACTGAAAACATTTAACATGTGACGGTGATGTAACCCTCTTAGTTCACTACATACACCCTAT
c6160_g0_i0	390	1.94	0	0	0	0	0	0	0	0	0	0	0	0	Uncharacterized protein			CAAAAAAAAGGTAAATTTAAGTTAATTGGCACATAATATAACTTGCATTTTTTTCAACAAAAAATATTAAATAATTTACAAATACAGAAGAATTGTACTACAGTTATATCAACAAAGTAAAGCGATGACTAAAGTTAGTGACAAATTGATAATATGTAAATATGCAATCGTAGTTGACCTTCTGTTGTGCATTCTTTGACGTGATTAGTTAAATAAAGATTCAGTGACCTTTGTTATCCAAAGATAGGCAGCGACCTCTTGTTTATTGTGTACCAATTCACATCACTTATCTTCAGATGTAAGTAAAAAAGGTCGACAGTATTAGTGACTAATGACTCGAAGGACCTGATTTCAACTAATCACTGTGATATATTAATGTTAGTAGTTATG
c20227_g0_i0	270	1.92	0	0	0	0	0	0	0	0	0	0	0	0	GBP85350.1 Kinase D-interacting substrate of 220 kDa B [Eumeta japonica]	5e-28	90	TAGCAATCTATATAATCTCGGCGTGTCGACGCTGGTATCTTAACAATCAGTGTTTAATTTGGTCTGATCACGTAACGTGTTGAGTCACAGTTAAACCTGCACGTTAATATAAGCACCACAGTTGATGAGGGCCACGGCGATGTCGTAGTACCCTTCCTTGCACGCTATCGCCAGCGCGGTCAGCCCGTCCTTGTCCAGCGCGTTCACGTTAGGCTTGTGTTCGATCAGCATTTGAACTATTTCTAAATGATTTCCGTGTGTGGCTTGCAG
c34132_g0_i0	337	1.9	0	0	0	0	0	0	0	0	0	0	0	0	KMQ87036.1 zinc finger mym-type protein 1-like protein [Lasius niger]	4e-43	77	AAAATGTGATCATGTCAGGTGTTACACTAGCAGCGTGTACGCCAGATAAATTCAAAGAATGCGCTGCACAAGGCACATAATCAGCGTTTTCATTAATTTGTTTAATTTTGGCTTGGACTCCGTTATATTTACCGGCCATATTACTACCATTGTCGTAGCCTTGGCCACGATGATCTTGAATATTCAATCCATCAACTTCTAATTTCTCTAAAATCTCTTTCGACAATCCCTCGCCCGTTTTTTCATGTGACTGGATGAAATCTATGAATCGTTCTTCGATTGTAACTTTCTGTTCTTCTTCTGTTAAGCCATCACACGTTACGCAGTAGTGTGAACG
c9626_g0_i0	307	1.89	0	0	0	0	0	0	0	0	0	0	0	0	Uncharacterized protein			GTAAATACGGCATAACGGGTTTATCTAAATTTTTATCAGTATCCAAATATCCATTAATACACAGTTTAATAAAATGTAGTGTTTCGATATCCGACATCAAATATCGATACATAGTTTCGATTTCATATTTATAAATAGGTATATTACCCACTCCTACTATGTAGCCTTAATTGGAAATGTATCCTGCAGTCATGTGTAGGTAGAAGTACCCAATCATTATGTCTACCTATATGAATATGTAATATGTATATTTATATATCAAATATAAAGCGAAGAATAGACGAGTATATGAGAATTTTATGACGGG
c36970_g0_i0	272	1.83	0	0	0	0	0	0	0	0	0	0	0	0	Uncharacterized protein			CAACCATTCGGCAAGACCGATACACACAACGGACTGCAAGACATCAGCCGATGGTAATCGGCCCAGTAATATAGATTTAAGGCTACAAAACTAAAGTGTTGTTGTTGTCTCCGAACCGAAATCGACTGCATGAGCCCAACTATACGTCGCGGGAGTCGCCGTCGTCGAAATGAACGGTGTAGGGAACATATAACATGGACCCAAGAGCAATGTAATAAAATATTGTTTTGCGATGAGTCTCGATTAGGGTTTAGGCCTGATACAAGAAGAGT
c59012_g0_i0	272	1.83	0	0	0	0	0	0	0	0	0	0	0	0	Uncharacterized protein			TGAGTGTGATAATGCCGAAGCACTTAAGCACTTAGCCAGCACCAGGAGTGGCTTGAGCCCGCAAAGCACTGAATATCCAGAACTTTAATAGTGCTGCCAAGTACTGCAGACGTGCCCTCCGCAAGGCCCAAATCGACTATGCGGGCCGAATCGGAGCCAGACTAGCGTCTTACCCATCTGGAAGTAAAGTTTTCTGGTCTCTTGCCAAATCAGTGGAAGCCAATTTCAGCCGGTCTTCTGTACCACCATTGCAGAAGTCGGATCGCTCATTA
c61135_g0_i0	310	1.81	0	0	0	0	0	0	0	0	0	0	0	0	Uncharacterized protein			GTCAATTACAAAGTATCCTAAAATAAGGTTTCACCACGTATAATGAATGTTATACAAAGGACAGGTATACATTTTAATAAATAGAATAGTACCTGGTATCTGGGTGACAAATCTATTTGTAGGATACGTGTAAACAAATAGTGCTGTTTAAATATATAATTTTTACCCCAAGCTTTTTTACAATGTCTACAAATTGAAATGTCTTGAAATTTTTTTCTACTTTTCCACCTGTTTTTCTTTTTAGCTTTTTGAAGCGAAACTTTTTTAGCCACGGCAGTGAATTCACTCAATGGGAACAAAAAGCGTGACG
c11833_g0_i0	400	1.8	0	0	0	0	0	0	0	0	0	0	0	0	Uncharacterized protein			GTCGAATTCATTTTAGTTTTTATAATAATAATTACTTATTATTTTGATTTTCTTAATCTATTTAACACTTGTTTTTGCTCTTTTTCTGTAATTATTTAAGTATTCTGGTCATAACTAATGTTAATAGTATTTTAATTTTGAAATAAATTTCTAGAGTTCAAGCTACAATAGACAAATATTTTTCAATATAGGCCACGAATAGAAATATTATCACATTTATAATAATTTTATTATGTTCACGATGAGATATCTCGACTTTCTACCAGCTAATTCTTTTCGTTAAATACTATAATAATTTTACCTCTTTAGGGAACTAAAATAAAAAATGTGTGCAGTTCACGCGAGCTAAAAGTGAAACCTTCATAACTATAACTGACTCAATAGTAAAAAAAAAAAAAAA
c40234_g0_i0	374	1.76	0	0	0	0	0	0	0	0	0	0	0	0	Uncharacterized protein			TTATTCCTTCAAATATGCTAAGCCTGCACTGACTGTAATTGGTGAAGAGGTTGGCCAGCATGGAGCCCTAACCTTTTTACATTTAGCACAGCTGAGTGGGAACACATTCCACTGGACATTATCACAAGCTTGGTGGAAAGCATGCCAAGATGATTACATATCAACAGGAGGTCATACTCATTATTATTATTTATTTATTAAAATGCCATAAAAATACTGTCTTATTTCATTATTTTTAATGTCCATTTTAACATGACTATCTGTTTACATTGACTAAAACACTGATTCTAGGATTTCAATGTTAAAAACTATATTCTTATAGATCATAAGCTATAGAAAAACCAATGAGTGTAAGGTATAACTAACAGCCAATG
c9959_g0_i0	274	1.75	0	0	0	0	0	0	0	0	0	0	0	0	Uncharacterized protein			CCTGGCTCTTAGTCCATAACGGGACAGTGAGGCATCTTTTTTCGTGCGTGCAGCAGCGCTCATCGATTTATTAGACGCTGTCACGTCAAAATAAATAAAATAAGAGATTACTCTATTAATTCTTAATGTTATTATCCGGAGCGCTTTTGTCAAAAGTAGTAGATTGCGATATAAAATGAAATAAACGAGCGAGCGTTACAGTAGTTGCATATGATATGTAACATCATAACTAAAATGGGTTCGCACTATGTCACAGCCATCTCTCCGCCACCGC
c21787_g0_i0	344	1.75	0	0	0	0	0	0	0	0	0	0	0	0	Uncharacterized protein			TCTGTTATGAATAATTTAATTACAGTAACGTCATGTGCAACGGTGGTAACTGTGTCTAGTGTGGCCGTGTGTAGTTCTGGGTGAAGCTATGAACTTTCGATCACTAGTAGGTTCATAATGAGGCTTTATTTTGACAACGTGATGTGCAAGGACTTACATTGTTATTAAAAAGGTACACAATATTGGGAAGGTCCATTCTCAAAACCTTATTTACTTCTGTTTTAAATGTAGGATATCTTCCAAGAGTACAAAGTTATTATTAATTTTTAATGAAACTTTTAGTTACCAATTAAAGTTACTTAGGTTTCTCAATTTATTTAATTATTTTCCTACCCTCTTCCAAG
c58757_g0_i0	435	1.73	0	0	0	0	0	0	0	0	0	0	0	0	Uncharacterized protein			AACGGGACGTCTGGTCACGTTACGTATACATAAATTTTTCTATCGCAAATTGAATAAGCGATGGAAATCTTGATGATGAAAACAATGAACATTTTGCGAATGAGCGAAACTCTAGAATGAGAGATGCGAAATTATTTACTCGCATCAGCCTGGCTGTTGTGGGTTCGAATCCGATAAGATTTAACATTATTGCATGTTTGTTTAAAACCGTTGTATAGAATCTAATGTAGGTACAGTCGGCAATACTTCAAGATATAGGTAAACTTTAACCTTTGACCACCTACGCTGTGTGGGCGTCAGCACTAAAGATCAACTTATACTGTAATATGTGGTCCACTAGTAAAAGAGAAAACGTTAGAAGGATTTGTGGAACACTTGTCCCGAATATTATTAGCATCG…
c71874_g0_i0	376	1.73	0	0	0	0	0	0	0	0	0	0	0	0	Uncharacterized protein			ATAAATACAAGTAGCTTATTATACTAGAAGTGGTGTTCATAATTACAGTTTCAAATTATGGGCAGCGAACTCAAAGTGAACTTCCTAACTAATTTGCGAGTGGTCTGATGATTGCAAACGTTGCCCAACTTCGCCGAACTTCCGTAGTATGGTAAACTAAGATTGAACATGACCTCAATGGGTTAAAGCTGAAAATATTCTTAACTATTCATTTGCCGCAGATTAGACAATATATTTCCAATACAATATATTTCCAAGTATAAAGTGTATTTTTCATCCATCCATTTGGTATGGAGTTTCTATTTCAGATATTATTCCTTGACGGAGTGAAGTCATATCTCAGAAAGTAGCTTTCGTCTAACTTTTTATATGTCAG
c6250_g0_i0	376	1.73	0	0	0	0	0	0	0	0	0	0	0	0	Uncharacterized protein			GTGGATAAAACATAAGCAAATGCTTAAGTTTTGGTATAGACTTTTAAATTTAAAATGTTCAATTTATATACAAGAATCGTAATACGAATTGTCAAATTTTGTCAAAGCATATAAAGATGATGGAATAAGGTACTAAGTAGTCAATCTCATGATGATCGTCTTTGATATATCAAAGGAAACTTTGAATGAGATTATTAAATAATTAATTATATACTCTGTCTATGAATTTCTTCTGAGGATTTTTTATTATGTCTTCATAAAAAGAAATTTTCAATATCTATGTATGGAACAGGGACTAATGGAAAAGCCGGTAAAACTTTATCAAAATTAAACAGAGTATATTGCACTAAAAATTTCGTACACAACACACTACCCT
c20557_g0_i0	314	1.7	0	0	0	0	0	0	0	0	0	0	0	0	Uncharacterized protein			TCTCTTGAGACCGCATCAAGAGTAAAACATAAAAACAAAAAACAAATAAAAAAAAGGTTGTAAAGTTTTATTGCGTCTTCGGTTTTAGATGACTTTTTCAGAGGCCAATGATATAAAAAATAAACTTACGTCTCTCCCGTCTCGTCCTGTACGAGTATTCAATTTTCATCAATTGTTAGATTATTATTATGATTCTTTTCGTTATTTTCTGTATTATATAAGGTCAAAGTCGTCTTATTTGATAGGTTATAAGACCATAGCCTCTTTAGCAGGATTTTACCGGTTGTATCACGGGGAGTGTTCCTAAAAGCTCT
c73795_g0_i0	277	1.64	0	0	0	0	0	0	0	0	0	0	0	0	Uncharacterized protein			TAAAGAAGTATAACTTCAAAAAGACACACACAAATTACGTAAGTGAATACTAATAAACTATTATCTAATAAAAGGTTAAAATAAATGATATTTTATAAATACACGTAAGTTTTTTAAGTGTAAAGATATTTCCACAGGCGAAGCTACGCGCGTAGAGACCCACAAGGTGAACCATAGCTCCGCTTCAGCCTTTATCATCTTTCATATACATATATCGTCGTATATTAAACAATATATTGTAAGTCACACATACCTGGAGTATTGCGGCGAATTTGTA
c9809_g0_i0	354	1.58	0	0	0	0	0	0	0	0	0	0	0	0	Uncharacterized protein			TACGCTTAGATCTTTTAAGCTACGTAACGGATTTTAATGCTGTTTTATCCATAACGTACTTCAAGAGAAAGGTCTACACGTACAGTTTAATTAACCATGGTTTCACCAGCACTACGAATAGGCGCGGTTTGGCTAATAAGTGCATTATATATTAATCATAAGTAACCTGCAATTGTTAAGGTGATAAAAAAATACTGCATGGATGCATACTGCGTGAAGACAGCGAGCTTAAAATAAAATGAAAATCGTAGAAAGAAATATAAAGTAATAAATCGTCAAATAGAGTTAAAGTCTTAGACGTCTATCGTTTAATTTATACACCTAAATAATAATAAAATAATGCATTTTACACAA
c34861_g0_i0	279	1.57	0	0	0	0	0	0	0	0	0	0	0	0	Uncharacterized protein			TAAAAGACCGGTGGGATGCCTTTGACATTAAAATTAATGTTTATGATAAATTTGGAACTCCAGGGAACAGCTAGTCTAGAATAAAAGCAGCCTAAGTAACTTCTCATAGCATTAGCTGCCAGTGAAAGTCCCGTTAAAATCGGTACAGGCGTTTCGGTAAATTTGCCGGAACAAAAGTTTTGAAAAAACAATTTTAGTTTTGGCTTTAATGATCTGCATGCATGTTTATACTTAGTACTGCATTTACAAAGAAATTGTTATTTTGATATTACAGACACT
c84198_g0_i0	391	1.54	0	0	0	0	0	0	0	0	0	0	0	0	Uncharacterized protein			AGGTGAAACTAATAAAAGCATGTTGATATTCTCTAAACAAAAACTAATAACGGCTCGCCTATATTTATTATGTAATAATTTCACTCGAATATCATAACTAAGGCAGGTCAGATTACGCTGGCCATATAACCGTGCACCGCTCACAATCGGACGATAACACAACCTTTGACTGAAGCGAGATCAGTTGAGATCAAACAAATAACTGTTAAGATGAACTCATTGATGATGTTTCTCGACTAAACTAGAACACAGATTTCAAACATGGTTATTTTAATAAGAAAGGATATTCAATATGGGATATTTATTATATTTAATTGGAATGAATATTGTACAGATTTTCCATATTAAAAATATTATTATTATTTTATTATACCATTAAGATGGCAAACAA
c21726_g0_i0	358	1.52	0	0	0	0	0	0	0	0	0	0	0	0	Uncharacterized protein			TTCAAAGGGCGAGTGTACAAGACTACAGGGCCGGTAACGTATCCACAGCCCCTCCGGTGATGCAGATGTCCATGGTCGACGATGACCAATCACACGGTGCAAATAATAAAAAGTATATTTCTTTGTTAGAATGCGTTAATTTCTGGAACTACCTATTTGACATGTATTCCATGAATGAACCTTGAATTCTTAATGAAAGACATTAAATAAAATATAGAACATTGTCTTGTCATGTTCTATTTCTCATTCCATGTTTTCCATTAAGAATTCAAGGTTCTAGTCCATGTTAAATTTTCGTAACATTTAAGAGCTATGTTTAAGAAGTAAGTAAGAAGCTAATAATTAAATGTATGACTTT
c67672_g0_i0	284	1.42	0	0	0	0	0	0	0	0	0	0	0	0	Uncharacterized protein			AATATGCTGTCTACTTAACACGAATATTATCTAAAAACTAATCAGTCATTTCTTAAGCGAACCAAATTTAATTTTTTGAGTATACGTGCGAATGTAAGAGAGTTCATGTAAAAAGAGTGCATCTCGCTTCCCCTTGTGGGCTTCTTATGTAGTTTTTCAAATTATTACGCGCACTTGCTCTAACCTATTAAATGAGTGCTATTTTATACAGCTAACTCTAGGTCTTACCTAGGACCTATCAAATTATTAAGAAGAAAAAGCACGGTTTTTTTGTAATTAAATAT
c42164_g0_i0	285	1.39	0	0	0	0	0	0	0	0	0	0	0	0	Uncharacterized protein			GTCGATAAAGAAGTTTCACTTCATAAAAGTATGCTCGTACTTGGTTTTCAATATTTTATAGACATACTAGGTATGTAGAACTTAACCACGTGTTTTCCAACCCAAAAATTATTATTATTCATAAGTGCCGTAGTAGAAAACCGCTCAATGAAGTTATCTACATCCAGTACTTTTTTCCCTATTTGTGCAGTTGCGTAGCTTTAATATTTATCTAATTTATAATTAGTAGACATAAATTTGCATTAAAAGCTGTGGTAGCCTAGTTGGAGTTCGATCCCAGGGCTG
c15139_g2_i0	393	1.38	0	0	0	0	0	0	0	0	0	0	0	0	Uncharacterized protein			AACGCCTTGCGGAGGACGGCAATATGTTCTGGTGGAAGCTCATCAGCCTAAAGCATATCGGATGCGAGTAAAACCAATTAGGCGCGAAGCTAAAGTTGGGAGTGTTTGTAAATCACGAACAGAATAATGTGGGTCATAAAGAAAACTTTCAAGACGCAGAAACAGTATGTGGGTACCAGTGAGGCGTAATAAAATTTTATACGAACTAAAATAGATTGAACGCGTAATCCGTAGTACTGCGATCACGAACGCTCTTCGCTTTAACGTTTACAAGGGTTTTAATTGAGAATGAACATTTAGGTCGAAGATTATACAAACAAGTGTGTCTAGGTATAGATTTGTATTTTATATTAATTGCAGCGGAATTTCAAATAATATCTCCTCTTGTTAAGC
c35888_g1249_i0	286	1.36	0	0	0	0	0	0	0	0	0	0	0	0	XP_022114270.1 LOW QUALITY PROTEIN: histone-lysine N-methyltransferase SETMAR-like [Pieris rapae]	0.005	52	ATAATCGTAAATGCTCATCACAGTAGTTAAGCCCAAGAGAACCGGCTAAATCTTACCACATGCATAAGTTGACTTCAAAAAATGTACTAGTTAGTGTCTGGTGGGCCAGCGTTAGTGTCATCCACTACAACTTCCATATACATATACGATACAAGATCTGGTTATACGATTACGATAGATTTGTGTTGCTAACAATTGGACACCAAACCAACCATTGAAAAGCTAGCCGTAAAACAACAGGAGAACGCTAGACCACACACTACACAACAGATGGTGGCGAAACTAG
c50260_g0_i0	288	1.31	0	0	0	0	0	0	0	0	0	0	0	0	Uncharacterized protein			CCTAACATTCATTTGGACTATCTGCGCTACGTATATGCGCTATGTATGCGTCAATACTAAAGGGCGTGTTAAACGAGTGCTGGGATTGTACGCTGTGATATGGTGTCGATTGTACTTTTTCAACACCAGCCATTTTATAATAGGCGCGGTGTTAGAAATTGAACCGCATCTTCGACCGTTACTCATATACTTTTAAGATTTGAACTTTAATCAGATATATTTGGACTGTGGTAGATCTCTACTCTGTGTGTTTGTTTTTAAAATTGCACACTTTTACACATTTTAAAA
c36545_g0_i0	328	1.31	0	0	0	0	0	0	0	0	0	0	0	0	Uncharacterized protein			AAACATTTGACATGTAAGTACTGGATTGGTCAAGAAAATAAAGAATAAAAATTTTATATGGAGTCCGGAAATAGAACATCATCGTAAAACAAAAACACGATGTACGGTATGCAGATGAAGTAAAGGCGTGAAACGATAATCGATTGGTGCAGGATGGGCGCACCAGGAGGCGCGTGCAGCGGAACGAACTTATCACCGGAGCCCCTCGGTCGCCGTCACGGTGCGCGACCGTCTGCAATTCCAACTACAATCGTTCCTAAAGCTTCAAGATTCCCGATGAATTAAGTGTCCCAAGTATCAATTGTTATTTTAAAAAGAACTTGATTGA
c7877_g0_i1	314	1.29	0	0	0	0	0	0	0	0	0	0	0	0	Uncharacterized protein			GCGTTGCCGACCCTTTGAAACCCTTTAAAATCCTAGGTGTCCTTAGCATTGACCCCTGTACTGAGCGCAGGCGTTACTCGACGTGTGGCTATTCGCTAGTATCTAATACTTAAATTACTTGATAAAGTGCCTTAAGTCAACTTATTGATCAGAAATATTAAGTCTAAAAAACAATAACAAATATGGAATAGAAAAAAAAACATGTTATACAGGATTAAACGACCGAATTTCGTATTTGTGATTTTACAGAATTATGTTTAGCTATTGTTAAGTAATGACATTAAGAGCGTTTGTGACGCGGGACGTCAATAGTT
c15250_g0_i0	379	1.27	0	0	0	0	0	0	0	0	0	0	0	0	Uncharacterized protein			CTCACCTTTTGAATGTCGCCCATGTCGTAGCGTAGAGGAAAAGCCTCGGGAGGAAGAGCGTTTCATAACTTAGCGGTACCGGGGAGAAAACTTCTGGATACTCTCACATATCTGGAAACCCAGGTTTCCAGAATTTGTAGATGGGCCTTACTCCTATGGCGGGTGGTATGGTGGTAGAAAGGTAACGGTGGCACCAGTCCAAGTCCGGTATAAACAGTTCTCTTCATGGTATAGACGGTAGAATGCAAACAGAGAGATAACGTCTCTCCGTAGACTAATGGCATCTAAGCTGTCTGTGTGTTTGCGAACATTGATAATACAAACTGCGCTGCGTTAGATGGAGTTAAGAGGACGGAGTTTGTACTTGGGTGCCCCAGCTCGTGCATTGCTACATATGGG…
c77565_g1_i0	290	1.26	0	0	0	0	0	0	0	0	0	0	0	0	Uncharacterized protein			GGCAAGTGCTGAGTTTTTGCTAGATATTTGTTTTATAAGAAATTTGAAAGCAGCTTCTACTGTCAATTTAATTGGGATCAGCACATCAACAATTTTATTTGCAAAAGAAGTGACAGCTCTTATTCTTGTTCACTTTACACATTAACTTTTAAAAGTATGTATAATTTTACTATGATCTTTTGAAATAATTTAAATACTCATTTGTTTCTTTTTTGTGTATCTATTATATAACAGACACCTTCTAGGCACAAGTGTACCATCTTCGGGCACATCTTCGCCTTCCATCAAGC
c10460_g0_i0	382	1.23	0	0	0	0	0	0	0	0	0	0	0	0	Uncharacterized protein			TACGAATACTTGGAACGTCCACGATGAACGGGTGGTAATATGAAGTCTTTCAAAGTGGCCGGTGATGAAGGGGAGAGGGTGGAATAAGGTAAATGAAGCTCCTGGGCAGATGCTCGGAAATGTGTGCTGTTAAATATAAATAGCGAGGCTACTCTGCGGCGGTCGAGACCCAGAAGTTTCTTGGCGATAAGCTTGACCCACGGTTTTCAGTTAGTCCTTAGATGCTCTGTCAAACAAATGGCAACAGTATTACAGCCATACACGATCGGACTTGTGCATGGTACAGATGAAGCAACTACTCCGGTGAGATGTATCGCGTGACTTTATTGTGGATACCAAGTTTCTTGGTGGCCAGTTAGTTTAGACTTTCGAGTTGTCTCCG
c26231_g0_i0	1864	1.22	0	0	0	0	0	0	0	0	0	0	0	0	Uncharacterized protein			GCCTTTTTGTCACCGACGTGGTATAAAAAAAGGAAGATTGGTGAGAAATCAGTGTTAATAATCACATCTAGAACTGCATTATAATTCACATTTTTCGGACAGCAGGAAAAGAAATCGATTATTCATTGTTATTAATGGAAAGCATAATTAAGGAGTGGTCTGTTATGGATGAGATAAGCGCTGTAGGTTGTTGCATAGATTTCAGCAATATATGGTCTAGATAGTTTACAGAGCGAGTTTGATACGAGTGTACCGGTAACAAGCTGACCGATGAGACTAAATTTTGGTACTCACCAGAGCGATTTTGAGTTTTTATCTGTGATGTCAATGTTAATATCGCTCAGAGGGGAAAGGTTTTTATAAGTACTAAGAGTTTCTAAGACATTATTAAGGCCTTTG…
c64690_g2_i0	292	1.22	0	0	0	0	0	0	0	0	0	0	0	0	Uncharacterized protein			AAAAAAACAAAATAAATAATTTAAACCTAGGTTCTTTTAACGCAAATTGTTTCAGATATTTTCAGCAGGTTTAGACGTAGTGTCAATAGTGTTTCTGTGCAATTCGTCCTTATTGTACGCCTTGCCCGAACCGAAAGAAGGCCACGGGATCAAAATTTTACGAGACGCTATATTCGGGAGTTTATTGGCCGCTGGTTCAATGATGTTCTTCGCATCCATACTCCTGCTTGTCGGCGTCAAGAAGGTGAGGATGAAGTTTGATTATTTTTTATTTCATATATATACATAGATA
c50801_g0_i0	292	1.22	0	0	0	0	0	0	0	0	0	0	0	0	Uncharacterized protein			AAGTGATAAACAAAAACGCTCTAGATAGGGAATTAAATTGACCTTCAAAAATAAAACTTGAAGTTTCCTCTTATTACTTCCCACTATAACTATCACTTGTTGGTAGGGTTGCCGACCATACTGTTTGTATGTATAAAGATAATATATTTATAGACAATAAAGTGGAAAATGTTATTATAAAGTATGGTTGGAAACGCTACCAACGACCGTTATGGTGGGAAGTAATTATTGAAAACTTTGAATAAAAGTAATTTACATAATTTTTTTTATTTTACAAGCTTTTATTTAACTT
c38238_g0_i0	292	1.22	0	0	0	0	0	0	0	0	0	0	0	0	Uncharacterized protein			AAACAATTGTGTTGCAGTTTTAAATAAAATTAACTCTATGGTCTCTTGAGTAAAAGTAGGTTCTTCTTATTCCATACAAATTAATGTTAGATTTAATGGTATTTATTTTTTTTTTTTTTATAACTAGAATGATATTTTTTTTAAATGCCATAATGATACATAAAAGATGACAACAGAGTAACCCGGCACAAATTAACCAGACCCCGAACTAGAAATGAACCTGTAGAAACGGATAGTCAGTCATCGTCATCATCGTCATCAGTTTTAGTCATCGTCATCATCATTTCAGCCA
c18923_g0_i0	385	1.21	0	0	0	0	0	0	0	0	0	0	0	0	Uncharacterized protein			CGATGATCAGTTTGTTGTTTATTTGTTCACTGTCTAAAGCCTATATATGAACTTCTAATTGTAGCCAGTAGTACCTAATGTGAATACAGCTCGAAAAAAAGTCTATAACAAATTTACAAGATTGTTCTAGCGATTCAGAAACTGATTTAGATATAGATTTGGGGTGTATACCTTTAAGAAAATAAATGTATTTTGAATTATTTTAATTTAGTAACGTTTGTAATAAAATTAAGCCCAATTATATATTCCATTCAAAGTATGTACATCCTAGCGAAACTATAATCACTAGCATTAAAATGAAATATCGTATTGGCCTTATGTGATCACTTAGTAAATGGCTAGGTCTTTACGTTGTGTTTTTATTGTAAATTAATATTAACGGAAT
c7725_g0_i0	385	1.21	0	0	0	0	0	0	0	0	0	0	0	0	Uncharacterized protein			GTCCCTGACCCTACACGAGTGCGACCGGTCGACGCCTGCTGCGCGCCCGCGCACTTACAAGTGTCAAACCTAAACACGACGTCGCTACTTTGTTGCAGGACGGCTCATCCTCTCTACAAGGAGCTCAACGTGATGGCAGGGAAATTATCAGGCAGGGGTTCTTGAGACGTGCAATACCCAACGTCTCACTGGACATAATGATGGCCTCATTTTCGTCAAATACTTTGAGTCAATATAACATGTCATTAAAATTATAACAGTTACAACAGATCACTGTAACCCTAATGTATAAATTGTACAATTATTGGAATATTTGACGGAAAAGTCAGTCAGTAGTAGCAAGTTACTACATGAACTGACACAATAAAACGATTTTTTAAAGAAG
c14430_g1_i0	341	1.21	0	0	0	0	0	0	0	0	0	0	0	0	Uncharacterized protein			ATTGCAATAACAGTATCAGAAGGTCATATGTTGTGAACACTGAGCCTGTATCCTGTTGTATCTAGACCTGGAAATAGAAAGCTTAGATAAAAACAAATTATATCTTTATCTAAGGCAGAAAGTGACAATATTTGACAGTTGGTACTCCGAAAGGTCTCTCAGCCCTTTTTGTATTGTTAAACCTAGACCGTTAAACGGATGGATGAAATATTCTCATACGTCTGGCTACACACAGACTTACTATATCTCGTATTTCTGGGTGATATTTACCTTCAAATTTAATTTATTTATTCAGAAACACATCCTAATGTGTTTGACAATCACAAAATCTGATGTTGAAA
c5727_g0_i0	567	1.16	0	0	0	0	0	0	0	0	0	0	0	0	Uncharacterized protein			AATTTCAGAAACAGATATTTTTATTTCTATATTTTAGAATTTCTTTACCTTAGAATGAATTTGTATTAGATAATATATCTAGTGCAAAAATTAATTACATTTTAATTTATACGTAAAAATTAAATATGTAATTTTATGAAACCTTACAAATTGAACAAACCATTATGCTAATTGTGGTCACTCGTTACGTTTGTTATTTTAAATGTACTAAAAGTTTTTCATAAAATTAGGGACTATTAACGTTTCTCGAGATTACTGCAATTAGCAGCTTTGAATTAAGTTGATACTTGGAATGTTAATGAAGATATTATACTTACAGCGTATTTCGTTTTTTATAGTAACGACTTTTGGGGGGAAAATTTTGGGATTGGTACTTTTGCTTTTAATATATAGTCGACT…
c28562_g0_i0	345	1.16	0	0	0	0	0	0	0	0	0	0	0	0	Uncharacterized protein			ACCTTAGCTATTAATGGGCATTTGCCCAAGCAAAGCCACGTGTACAAACAAGTTGTATAAATTCGCATTATTTAATCCCAATATTTGTATTGGAGATACTTTAGAAGCGGCGGGAGGTCGAATTTATTAATTTATCGTAATTGATTTTACGAAAACAATGTCATAATTTTGGCATTACGTCACAATTTATGGCCCACCGTTGCTCGGATGGAGTTCGAGAATTTTGAGTGAGCAATATTTATTGTAATTTACACTGCAGGTTATTTATATAATATGTCACATAATTAAGCATTTAAGGGGGGCAGGCATAGTGCGTCAAAGTCAAATTAGAAAAATAGTGTGACA
c10699_g0_i0	295	1.15	0	0	0	0	0	0	0	0	0	0	0	0	Uncharacterized protein			AAATTTAACCGGTTAAAACTAGCTATGACTAAAGTAAAAGAAGGAGATATATAGAAGCAAAATATTGTTTTATCTGTTATAAGAATAATTATAAGTGAAAATCTAAATGAAGTTGGTCAGTGGTGAGTTGTGAGTGGTGACGTCCGCGGCAGTCACTTGAGACAGTTATGACGAACATACACGAACATCCGCACTTGTTTAGCTCGCGGTGTACCGTGTGCGATATGCGTGGTGCGTTGTGCGTTGTGCGTGGTGCATTGTGCGGTGTGCGATGTGCGGTGTGCGGTGTGCGGTG
c15227_g0_i0	395	1.12	0	0	0	0	0	0	0	0	0	0	0	0	XP_021196792.1 importin subunit alpha-4 [Helicoverpa armigera]	4e-77	100	CGATGCCTCCGCATTCCTCAATCATGTTCGCGACCTGGTCGGCGTTCTCGCCTGCCATCTTCAACATGTTGCTTAAACCGTCGAGCACAACATTGATAACTTGAGTATCTTTGCAACTGAGCAGCTTGCAGAAGGGCGGGATGACGCCGCAGTTGATGAGGGCGGCCACCTGCTCCTTGGTGCCGCTGATGCTGAGGTTGGAGACCGCCCACGCCGCCTCCTTCTGTGTCTGGAACTCTCCCTTGGTGAGGTTCTCCACGATCTTGGGCAGCAAGCCCGCGTCAATCACCGCCTGCACCTGCTGCTTGTTGCCCGCTGTGATGTTTGACAAGAACCATACGGCCTCTTTGCAGATCTTCTCTTTCGATATAAATTACTGCAAAGTAACGAAAAAG
c20165_g0_i0	673	1.11	0	0	0	0	0	0	0	0	0	0	0	0	Uncharacterized protein			GGTGCTCAGAAATCGATGTGGTTTTCACTATCCAATAGCTTATTTTTCAACCTATAGATAGCGGATTTCTTTTTATCTCTGAATTGTTACTACTTACTATATTATTACAAGGAAGTCGAAAATATGTTTTTCCACGTGAACAAAGCCGTGCCGTGTCGGCTTGTTATGTTATATATTAGTTGTCGATATTTATTAGCTGTCGACAAAATTCTGGAAATGCAACTCTAACGATAGGATTTTATACGTTCCAATGAAGTACAAAAATTTATGAGACCAAAAATATTTAATGTGGAGTAAATAAGGTTGTCAAGACTCACAATTTCGACGCTTTCTCTGTTAGTTATTTTACCATATGTAGAGAATTACGCTCTTTTGGTCGTTTGGTTGACAAGTAGCTTC…
c81641_g0_i0	488	1.11	0	0	0	0	0	0	0	0	0	0	0	0	Uncharacterized protein			CTGAAATATATAAAAATGGGGTTAATACACCTTCTAAATCTAACTTTTGCGCAAGGTTTGAATAGAACGTTACGCCCACGTGTATATTGACTGTGGATAGTTCTACCGAGATGGAACTTGTATTAAACATTATTGATGAATTAGTTACTCATTGTGACGATTATTTGGCAACGTATCGTACAGTCAATGATCTGTCTCTGACCTCTGGACGCTCCGCGCTATATGGGCGTCGATACTAAACAGCGTTCAATGTTTACGAGCGGTGTACACCGTGATGTCGCGTCGACTGTCATTCTAGTTAAATATACGCCATATTCATATTAAAACATGTTCTGAAATTAATCTTATTTTTTTCTGAAACCATTGATAGCGAGAGATTGCTACAGTATATTAGATCTA…
c5655_g0_i0	721	1.1	0	0	0	0	0	0	0	0	0	0	0	0	Uncharacterized protein			TAGAATAGCTAAAATGTTCTGAAAAAATTTCAGCTTAATGATAAACTAAATTTCAGATAAACAGAATATTTTAGCTATTCTACTTGAGGTGCGTTATTGTTAACCTACGATAGGGCCTGCAGATTACGAAATTTTCTTTCGAATAAGTTTATTTCGGAAACTGACTTTAACACATCTGCCCGGTTAGTCAAAGGTTCGAATACTGTTGTCCATATAAACACTATGAAGCTGTGTATCTGTCGAATACAGAATCCTCCGAATACACGATCTTTCGAATACATAATTTGTCAAACACTGAATCTTTATTACGGGCTTTAGCTACAATCATTTATTTATTAGTAGTTCAACAGATTTTCTATTTGACATAAATATTTCAAAAATTTACTCCAAAAGGTCATC…
c18395_g0_i0	446	1.09	0	0	0	0	0	0	0	0	0	0	0	0	Uncharacterized protein			GTTACGTTGATGAAAGTAATCTGTTTCTAGGATAAAATTAAAGTAGTCATTGTGATTGTTGATTTCTAACTGAATTTTAACTATTTGGTACACGAGTCGGCGCGAATGATCAGACATTGTACATGGAGACCAGTTATTCGGCCGATAAAGACAAGCAACAAAACGTCGTGTACCGAATTATAATCGAGTACTCAGCGCATCTCTAATAAATACCTATCTGTACTCTCGCGTTTACACTTTTAAATGCCAACTAATTCTAGAAATAATACCTATTATTATAATATAGTTAATGCAAATCTGTTTCTACAAGGTACCTAGTATAGAGATGATCTCTTATAAATTTTATATTTGTCTCAGTCCTCGACACGTCCTTGACCTTTAGTGACGCAACACATGTAA…
c6069_g0_i0	585	1.09	0	0	0	0	0	0	0	0	0	0	0	0	Uncharacterized protein			GAGTGCTTCGTTTGGAGTTCCCTGTGAAATTGATTTATAAATTAGAATTTATGATTTATAATTTAGAGATTAAAAGGACCGTGGTCATCTGAGAGTTACCAGAGTTTAATACTTATGGGCAGACCACTACGTTCAGAAAACTAATCGCTAAAAAGATACAAAAGTACTCGAATGGTGATCGCGTATCGGAAGACGTGGAGTCTGCAAATCCAACAGCGCGACAATCTAGTTGACTCTTTTAACTCTAAAAATCACAATAAATTCACTAGGTGCTGGTGCTAATCTGCTGTGAGGAAGTTTTTACCCCATTACCTAAACACACATTTTCGAAACTTTTAAAAATAAACCTCTAAATGTTTCACGGCTTAAAAACCTACTAACTACAAACTTAAAAACCTG…
c5654_g0_i0	351	1.09	0	0	0	0	0	0	0	0	0	0	0	0	Uncharacterized protein			ATTAACAAAAAGGCGGAAAATCTTTTATTTATATTCAATATAAAAACAATGTTTTGTTTAGTGGTCGCACCTTCAGCAGGTGAAACATTTTGTCGAATACCCGCGAAGCAGGTGCACATCGATAAGAGGCTCTGTAGATTATGACTTGACCACTTTAAGCGAGAGTGGCACCTTTGAACTTCTTTAGTACTGTTTAAAACTGATATATTTTAAACTGAAAGAGTATTTTACACTTTTTAAATCACCATTGTTTTTGTTTGACACATTGTTCAAATCAAACCTCGTGATATTAAGTCTATAGATACTTGTACTTGAAATGGATATAACTGTATATATAGGTATAAAGCAAAT
c71223_g0_i0	447	1.08	0	0	0	0	0	0	0	0	0	0	0	0	Uncharacterized protein			AATACCTACTGTAACTAACTTTAAATATAAATATTGAAATGGTCAAAATATAACAAGAATATATATCCCAATTCCTAATATTATTTTAAATGTGCTATTATAATTTTTTGTTCAAATTATGTTTACGACCGTACGTCTATTGTATCCCTAAACCGATATTTCTCCAGGTTTTAAGTATCTAATTGTAACAGTATTTTTTACAAAATTCACCTGAATAACTCACAAAAAAAATTAATAAAAGATTAAATAAATAACTACGAGTTAACAAAAGTAACACATTTCATTATTTCCTCCAGTAAGACCGCAGTAACACTTTTATATTTTTTTTTTAATAATCTGGTGAGTAGTATCCTTGTAGTATAGCATACAATAAAAATAATTACTAATTAAAATCATTAT…
c8785_g0_i0	353	1.07	0	0	0	0	0	0	0	0	0	0	0	0	Uncharacterized protein			GTGCTGGCTGCCTCCGAGCCGGAAAGCGAGCGCGACCCCATTTCACTTGAGGCAACCACCCGCCCCGACCAGAAGTCTTTGACACTTAAACTGGGAGTAGGCCATTTATTTTAGTAATGTACTTTCGACAGAAATAAATCACCAGTTCCTATAACGTGATTGTTTGCACGCCGACCGCTCGCTGATGACGGGTTTCCTGTGCTCTAGCTTATGTGTAACTCCAATACGCAATAAGTGCAGCTTTCCGAGTGATGCGATTTCTCTATCCCTGATAACCCTCACCTGTTCAGTAGGGATTGTATGTATTTGTAGGTCAGCTGACAACATGTCACCACGATTAGTCCTTTTAAAAT
c12941_g0_i0	499	1.06	0	0	0	0	0	0	0	0	0	0	0	0	Uncharacterized protein			CAGCTTTTCTGTGATGCTTGAACAAACATTCAAACAGGCAAACGGGCAATTAAAATTTCATTTTTAAATTCGTTTCGGGCTCAGGAACGTCCAAGGAAGCTATTTATTTTTCAAAATATCTATAGTATAGACACGGCTCTTATACAGCTTTTTAATAGTAAAGATAGAGATTCAACTATTGTGCTGCTTTGTTTACTGCTTGAAGTATATCGGAAGAGAAGGAAAAGAATAAAGGGCTTTTTCTTTTTTAAATAAATTTGCAGTCCCAATAACCTTTTTATTGGTCCTGCTGTTTATAAATATGATCTCTGTTAATTCTAGCGGCGCAGTTATGGTTATTTACTAAACTCACTCTAACATTACAGCTACATTTAACATTATAACACTTACTATACTTAA…
c5699_g0_i0	404	1.05	0	0	0	0	0	0	0	0	0	0	0	0	Uncharacterized protein			TGTCAGCCGACCTGTTATTACTTAGCGGCTAGCAGAAAAGCACAACTGTACTGCAGTCCTCTATAGCTGGGCTATCAAATGCAAACATTTTCAAAATCGTATAAGTGGTTCCTTAAATGAATGCGTTCAAACACGCATATAGATTAGACGACACAGCACAGTGTAATAAACTAACAAACGTTCCCACTTTCATATTTATAATGCGAACGATAAGGAGATATTTATTAACACTATAAACTAGTATCATCTGTGACGGATTATCGTACAAAAAAAATTAACTCACATAATTACTAAAAATACGTTTTAAATACCAAAGATGTGTACAGTCGACGCCACATTCTCACGTACATATGTAACATAATCCTTCCAGTAAGTTGCGGATACATTGCGCGGATGGTT…
c63420_g0_i0	551	1.05	0	0	0	0	0	0	0	0	0	0	0	0	Uncharacterized protein			TATACTCTCATCGAATTCTTTTAAAGGTTGAATTTGATAAAAGTAAAGTTTTTCTTTATTTTCTGTCTGTCTGTGTTTTCATAATTGATATAAATGATCCTTTTTATTATTATTCTTTTTTTATGGATAAATAATATTTCTACTATATAAGAAAGGAAAAATGCGCTGTCTTAAAGTTGATTAATTTTTAATTATACTATGTTAAAATTTAAAAAAAACGGCTTACAATTTAAAAACAGACGTAGTTAAACTTTATAATACTGTTCAAAATGGAATTATAGTTTAAAAGTGGTTCCCAAACTTCAAACATTCTCTTCCGAAACCACAGCGAGGTAATTGGTCACACGTCTTAACATTGTCAACAGATAAGAAGGAAAATAAATAAAGTGCTTCACATGA…
c81600_g0_i0	301	1.04	0	0	0	0	0	0	0	0	0	0	0	0	Uncharacterized protein			GAGAGTTCATTCACGATCAGTTCGGATTAAGAAGAAAACTTGAAACACCGATATACCTACCGTCTTTCTAAGTATCCGGTGATGAAAGGGAGAGGATGGAATAGGGTCAAGAAGCTCCTAGGCACACTCTCCAAAATAAATGTATACTGTAAAATACGCATAGCGAGGCTACTCTGCGGCGGTACTCGAGACCTACAGTTTTTTTTAATACAATACCGTTTTAAACAGGAGAGTGTCAACGCAGCAAGACATATTTGTATATTACATGATGTACTCACTGGGCAAGGAGATCAGCATGGTA
c77053_g4_i0	303	1.01	0	0	0	0	0	0	0	0	0	0	0	0	Uncharacterized protein			AAGCATTATTAGGTAACAGACAGATAGATAGACTAAATTTCGCATACAAATTGTTGTAGTTATAAATAATAATTGTTGTTTATATACAATGATTATACATTACAGGTGTGGGACAGTAGAAGCGATGACAAGCTGACCTCCGACGCTGACGGAGACCACCGCCAGGAGTCCAGGGCTGTCCACGTGCGGCGCAGGGCCGCGTCCTCGGGAGGTGCACGACCTCCGCATACTGTTACTTTAATGGGCTTACACGAGCAGTTTTTTGAACGATATCACCAGGAAACAGTCGCCGAAAGGAGTTGA
