# Supplementary material for: Transcriptome analysis identifies candidate genes in the biosynthetic pathway of sex pheromones from a zygaenid moth, Achelura yunnanensis (Lepidoptera: Zygaenidae)
Source: PeerJ. 2021 Dec 14;9:e12641. doi: 10.7717/peerj.12641 (PMC8679906; doi:10.7717/peerj.12641)
Supplement: Supplemental Information 7 [file peerj-09-12641-s007.xlsx]

## Sheet: Sheet1
Gene	Biological template (N = 3)	Replicate_1	Replicate_2	Replicate_3		Gene	Biological template (N = 3)	Replicate_1	Replicate_2	Replicate_3		Gene	Biological template (N = 3)	Replicate_1	Replicate_2	Replicate_3
ATF22	MA1	22.08	21.72	22.06		ATF42	MA1	23.82	23.27	23.51		ATF54	MA1	27.66	27.4	27.27
	MA2	21.06	20.5	20.5			MA2	23.88	23.84	23.78			MA2	27.92	27.13	27
	MA3	20.84	20.46	20.59			MA3	23.32	23.78	23.35			MA3	26.57	26.76	27.01
	FA1	21.83	21.72	21.87			FA1	22.72	22.98	22.75			FA1	27.3	27.44	27.47
	FA2	21.69	21.07	21.32			FA2	23.76	23.7	23.72			FA2	26.85	26.22	26.01
	FA3	21.72	21.59	21.6			FA3	22.71	23.03	22.93			FA3	26.11	25.34	25.97
	MB1	23.14	23.34	23.21			MB1	19.85	20.13	20.42			MB1	25.39	25.28	25.78
	MB2	22.5	22.52	22.51			MB2	20.34	20.02	19.85			MB2	25.02	25.21	25.07
	MB3	22.46	22.77	22.66			MB3	21.4	21.1	21.1			MB3	25.03	25.66	25.14
	FB1	21.59	21.44	21.19			FB1	20.32	20.23	19.38			FB1	24.76	24.87	24.83
	FB2	21.42	21.35	20.86			FB2	19.92	19.84	20.16			FB2	24.65	24.72	24.65
	FB3	21.65	21.63	21.36			FB3	19.97	19.81	19.71			FB3	24.48	25.06	24.78
	FPG1	20.82	21.07	21.04			FPG1	19.53	19.57	20.29			FPG1	19.19	19.12	19.27
	FPG2	21.52	21.37	21.39			FPG2	20.28	19.35	19.05			FPG2	20.19	19.99	19.34
	FPG3	21.27	21.66	21.29			FPG3	21.25	20.98	20.36			FPG3	20.39	20.15	20.27
	LA1	22.43	22.13	22.42			LA1	24.21	24.58	24.65			LA1	26.43	26.28	26.4
	LA2	23.54	23.53	23.4			LA2	25.36	24.89	24.56			LA2	27.63	27.46	27.16
	LA3	22.68	22.6	22.19			LA3	24.33	24.07	24.06			LA3	28.12	27.37	27.33
	LMP1	20.65	20.51	20.45			LMP1	22.82	23.13	22.69			LMP1	23.56	24	24.23
	LMP2	20.76	21.14	20.87			LMP2	24.11	24.64	24.11			LMP2	24.59	24.26	24.37
	LMP3	20.62	20.42	20.42			LMP3	23.39	23.31	23.22			LMP3	24.45	24.42	24.7
ATF58	MA1	26.49	26.15	25.91		ALDH10	MA1	19.09	18.86	18.81		AOX2	MA1	17.95	17.79	17.74
	MA2	27.12	26.54	26.44			MA2	18.1	17.54	17.38			MA2	17.88	17.62	17.44
	MA3	25.04	25.29	25.37			MA3	17.16	16.91	16.89			MA3	18.04	17.98	17.9
	FA1	26.1	26.02	26.48			FA1	18.21	18.54	18.19			FA1	17.45	17.81	17.88
	FA2	25.7	25.25	25.49			FA2	18.09	17.33	17.92			FA2	17.54	17.18	17.21
	FA3	26.52	26.21	26.55			FA3	18.32	18.38	18.37			FA3	17.88	18.07	18.29
	MB1	27.74	27.78	27.57			MB1	23.53	23.62	24.13			MB1	24.24	24.31	24.26
	MB2	26.65	27.17	26.74			MB2	23.03	22.84	22.85			MB2	24.57	24.39	24.59
	MB3	27.75	27.65	27.21			MB3	23.63	23.62	23.36			MB3	24.58	24.82	24.77
	FB1	27.65	27.78	27.56			FB1	21.71	21.92	21.74			FB1	24.44	24.49	24.54
	FB2	27.03	26.79	27.23			FB2	21.58	21.34	21.98			FB2	24.31	23.95	24.69
	FB3	26.19	27.02	26.54			FB3	22.36	22.64	22.06			FB3	25.03	24.43	24.72
	FPG1	21.44	21.66	22.4			FPG1	23.37	23.31	23.36			FPG1	20.88	20.75	20.62
	FPG2	22.08	22.07	22			FPG2	22.99	22.44	22.32			FPG2	20.71	21.09	20.46
	FPG3	22.72	22.47	22.89			FPG3	22.93	22.92	23.01			FPG3	21.4	21.27	21.26
	LA1	27.05	26.6	26.93			LA1	24.59	24.33	24.7			LA1	21.58	22.16	21.64
	LA2	27.25	27.28	27.05			LA2	25.19	25.25	25.43			LA2	22.84	22.33	22.16
	LA3	28.04	27.55	27.05			LA3	24.97	24.69	24.54			LA3	22.01	22.17	21.82
	LMP1	26.91	26.14	26.3			LMP1	25.11	25.04	24.92			LMP1	21.88	21.63	21.59
	LMP2	25.64	26.36	26.05			LMP2	24.73	24.64	24.52			LMP2	20.76	20.82	20.74
	LMP3	26.54	26.06	25.97			LMP3	25.59	25.48	25.37			LMP3	20.57	21.26	20.76
AR2	MA1	21.64	21.36	21.28		AR7	MA1	20.58	20.28	20.57		AOX3	MA1	20.71	20.69	20.63
	MA2	22	21.99	20.26			MA2	21.07	21.14	21.09			MA2	21.12	20.72	20.68
	MA3	20.36	21.3	21.09			MA3	19.88	19.25	19.56			MA3	19.96	20.14	19.98
	FA1	21.53	21.57	21.12			FA1	19.88	19.72	20.5			FA1	22.73	23.04	22.34
	FA2	22.72	21.97	22.29			FA2	19.57	19.25	19.33			FA2	22.21	21.92	21.63
	FA3	21.25	21.45	21.1			FA3	19.66	19.94	19.56			FA3	22.36	22.18	22.71
	MB1	21.46	21.22	22.02			MB1	19.6	19.56	20.09			MB1	25.31	24.59	25.11
	MB2	21.62	21.49	21.3			MB2	18.98	19.58	19.19			MB2	24.48	25.1	24.57
	MB3	22.05	21.94	21.92			MB3	20.94	21.72	20.35			MB3	24.75	25.03	24.89
	FB1	22.16	21.41	21.17			FB1	19.17	18.43	19.19			FB1	25.98	26.04	25.19
	FB2	21.63	20.77	21.09			FB2	18.31	18.07	18.23			FB2	25.47	25.55	26.05
	FB3	21.01	21.41	21.77			FB3	18.21	18.51	18.26			FB3	25.42	25.18	25.16
	FPG1	18.75	18.8	18.88			FPG1	20.8	20.61	20.41			FPG1	25.08	25.44	25.57
	FPG2	19.15	18.51	18.56			FPG2	20.5	20.32	20.12			FPG2	25.21	25.65	25.96
	FPG3	20.02	19.67	20.32			FPG3	20.61	20.68	20.06			FPG3	25.51	26	25.07
	LA1	20.41	20.45	20.13			LA1	19.89	19.94	20.35			LA1	26.46	26.35	27.17
	LA2	20.73	20.27	20.12			LA2	20.54	20.42	20.2			LA2	28.33	28.34	28.23
	LA3	20.8	20.61	20.27			LA3	20.22	20.15	20.62			LA3	28.14	27.31	27.69
	LMP1	19.17	20.1	19.74			LMP1	18.14	18.14	18.2			LMP1	23.1	23.14	23.15
	LMP2	19.33	19.29	19.1			LMP2	18.09	18.68	18.19			LMP2	23.35	23.56	23.74
	LMP3	19.05	19.18	19.45			LMP3	18.52	19.1	18.31			LMP3	23.48	23.72	23.91
AOX4	MA1	22.27	22.11	22.06		AOX5	MA1	23.05	23.02	23.19		AOX6.2	MA1	28.45	27.99	27.87
	MA2	22.62	22.31	21.84			MA2	22.69	22.96	22.48			MA2	27.59	27.54	27.47
	MA3	21.25	21.33	21.47			MA3	21.46	21.15	21.57			MA3	27.61	27.34	26.72
	FA1	22.02	21.77	21.89			FA1	22.42	23.43	22.77			FA1	29.91	29.76	NO CT
	FA2	21.74	21.65	22.15			FA2	22.64	21.77	22.36			FA2	30.4	29.85	29.63
	FA3	22.44	22.4	22.23			FA3	23.3	23.33	23.42			FA3	NO CT	NO CT	NO CT
	MB1	25.43	25.49	25.5			MB1	26.21	25.31	25.88			MB1	27.37	27.28	26.89
	MB2	24.4	24.67	24.49			MB2	25.76	25.18	25.22			MB2	25.61	25.6	25.44
	MB3	24.78	25.28	25.24			MB3	25.96	25.52	25.14			MB3	27.02	27	26.87
	FB1	23.71	23.44	23.47			FB1	24.71	24.22	24.42			FB1	25.12	24.94	24.75
	FB2	23.41	23.18	23.4			FB2	24.75	23.88	24.25			FB2	26.67	26.47	26.42
	FB3	23.25	23.16	23.2			FB3	23.7	23.9	23.22			FB3	25.56	25.49	25.35
	FPG1	21.85	21.92	21.96			FPG1	24.38	23.74	24.02			FPG1	20.56	21.03	21.32
	FPG2	22.39	22.16	21.8			FPG2	25.91	25.61	25.6			FPG2	20.3	20.23	20.15
	FPG3	21.75	21.67	21.04			FPG3	24.84	24.65	24.51			FPG3	19.49	19.49	19.41
	LA1	23.67	24.01	23.63			LA1	23.14	23.12	23.14			LA1	29.43	29.37	28.81
	LA2	24.75	24.51	24.48			LA2	24.6	24.1	23.88			LA2	27.81	27.71	27.27
	LA3	24.18	24.03	23.98			LA3	23.53	23.79	23.49			LA3	29.87	29.77	29.13
	LMP1	23.37	23.66	23.43			LMP1	23.16	23.05	23.04			LMP1	27.97	27.91	27.36
	LMP2	23.37	24.02	23.45			LMP2	23.99	23.15	22.86			LMP2	27.27	27.17	27.12
	LMP3	23.6	23.65	23.34			LMP3	23.23	23.48	23.39			LMP3	27.83	27.27	26.98
FAD4	MA1	22.93	22.86	22.22		FAD5	MA1	25.03	24.97	24.29		FAD7	MA1	22.55	22.47	22.32
	MA2	23.16	22.95	22.73			MA2	24.83	24.59	24.44			MA2	22.46	22.43	22.39
	MA3	23.05	22.49	22.43			MA3	24.73	24.4	24.37			MA3	22.61	22.59	22.57
	FA1	21.3	21.29	21.25			FA1	23.97	23.85	23.82			FA1	28.05	27.91	27.67
	FA2	21.38	21.37	21.28			FA2	24.1	24.03	23.59			FA2	28.46	28.28	27.8
	FA3	21.4	21.4	21.4			FA3	24.38	23.96	23.81			FA3	28.32	28.15	27.95
	MB1	20.71	20.69	20.65			MB1	25.39	25.37	25.31			MB1	29.1	28.97	28.76
	MB2	20.67	20.66	20.63			MB2	24.89	24.73	24.69			MB2	27.56	27.56	26.95
	MB3	21.14	21.11	21.11			MB3	24.28	24.16	24.13			MB3	27.28	27.27	27.12
	FB1	21.09	20.99	20.95			FB1	23.76	23.74	23.64			FB1	29.06	28.82	28.67
	FB2	20.04	19.97	19.96			FB2	22.7	22.67	22.6			FB2	27.54	27.43	27.31
	FB3	20.39	20.34	20.17			FB3	22.93	22.75	22.72			FB3	27.69	27.48	27.45
	FPG1	19.28	19.27	19.25			FPG1	23.73	23.67	23.6			FPG1	23.57	23.46	23.29
	FPG2	17.46	17.42	17.41			FPG2	24.48	24.43	24.36			FPG2	22.76	22.63	22.62
	FPG3	17.54	17.53	17.47			FPG3	22.83	22.73	22.64			FPG3	22.84	22.82	22.79
	LA1	28.03	27.96	27.77			LA1	26.74	26.63	26.56			LA1	29.07	28.6	28.59
	LA2	28.16	28.07	27.99			LA2	24.74	24.74	24.72			LA2	27.15	27.06	27.02
	LA3	28.18	28.09	28.09			LA3	25.68	25.6	25.3			LA3	28.88	28.86	28.66
	LMP1	22.96	22.89	22.78			LMP1	22.96	22.84	22.77			LMP1	28.74	28.51	28.5
	LMP2	22.78	22.75	22.62			LMP2	22.77	22.74	22.61			LMP2	28.19	28.01	27.89
	LMP3	23.92	23.89	23.79			LMP3	23.2	23.08	23.06			LMP3	29.47	29.36	29.19
FAD12	MA1	21.3	21.37	21.33		FAR1	MA1	26.97	26.73	26.45		FAR9	MA1	29.58	29.39	28.88
	MA2	21.62	21.59	21.51			MA2	26.97	26.95	26.87			MA2	29.94	29.86	29.31
	MA3	21.51	21.49	21.41			MA3	26.74	26.71	26.68			MA3	30.36	29.42	29.33
	FA1	21.5	21.34	21.32			FA1	25.47	25.42	25.38			FA1	29.36	29.35	28.56
	FA2	21.99	21.48	21.4			FA2	25.43	25.33	25.26			FA2	29.36	29.29	29.19
	FA3	21.76	21.5	21.49			FA3	25.77	25.61	25.61			FA3	29.98	29.91	29.8
	MB1	22.38	22.23	22.21			MB1	26.24	26.16	25.81			MB1	21.2	21.1	21.09
	MB2	21.61	21.46	21.39			MB2	26.56	26.39	26.24			MB2	21.29	21.17	21.15
	MB3	21.2	21.09	21.08			MB3	25.18	24.97	24.9			MB3	21.15	21.07	21.07
	FB1	21.17	21.14	21.02			FB1	26.77	26.75	26.62			FB1	20.86	20.79	20.74
	FB2	20.26	20.24	20.18			FB2	25.7	25.52	25.48			FB2	21.59	21.47	21.4
	FB3	20.53	20.53	20.39			FB3	25.63	25.6	25.5			FB3	20.24	20.13	20.12
	FPG1	20.99	20.88	20.85			FPG1	26.03	25.92	25.7			FPG1	20.43	20.31	20.25
	FPG2	20.13	20.1	20.07			FPG2	26.1	25.73	25.67			FPG2	19.19	19.03	19.02
	FPG3	19.92	19.87	19.86			FPG3	25.3	25.27	25.23			FPG3	18.68	18.56	18.53
	LA1	22.63	22.54	22.43			LA1	31.38	31.33	30.99			LA1	24.89	24.84	24.74
	LA2	21.43	21.34	21.32			LA2	31.43	30.81	30.44			LA2	24.24	24.18	24.15
	LA3	22.05	21.93	21.81			LA3	30.86	30.85	30.12			LA3	24.41	24.35	24.27
	LMP1	20.24	20.1	20.05			LMP1	28.13	27.91	27.84			LMP1	21	20.96	20.9
	LMP2	20.36	20.08	20.05			LMP2	28.3	27.79	27.68			LMP2	20.98	20.9	20.82
	LMP3	20.65	20.54	20.48			LMP3	27.91	27.45	27.24			LMP3	20.78	20.76	20.74
FAR10	MA1	23.63	23.5	23.43		FAR11	MA1	20.62	20.59	20.58		FAR12	MA1	NO CT	NO CT	NO CT
	MA2	23.73	23.69	23.55			MA2	20.74	20.72	20.63			MA2	NO CT	NO CT	NO CT
	MA3	23.81	23.52	23.51			MA3	20.79	20.73	20.71			MA3	NO CT	NO CT	NO CT
	FA1	23.51	23.39	23.22			FA1	20.21	20.18	20.15			FA1	NO CT	NO CT	NO CT
	FA2	23.47	23.365	23.3			FA2	20.34	20.29	20.24			FA2	NO CT	NO CT	NO CT
	FA3	23.65	23.6	23.44			FA3	20.4	20.39	20.36			FA3	NO CT	NO CT	NO CT
	MB1	23.79	23.7	23.66			MB1	20.84	20.78	20.76			MB1	24.56	24.49	24.45
	MB2	23.33	23.1	23.04			MB2	20.95	20.89	20.87			MB2	24.03	23.88	23.88
	MB3	23.34	23.32	23.32			MB3	20.7	20.69	20.65			MB3	25.2	25.18	25.03
	FB1	23.36	23.35	23.1			FB1	21.28	21.24	21.19			FB1	27.49	27.34	27.15
	FB2	22.51	22.5	22.38			FB2	21	20.93	20.9			FB2	28.91	28.44	28.38
	FB3	22.39	22.28	22.13			FB3	20.71	20.71	20.67			FB3	27.71	27.31	27.23
	FPG1	21.73	21.59	21.56			FPG1	19.24	19.23	19.19			FPG1	30.85	30.28	NO CT
	FPG2	20.9	20.68	20.67			FPG2	17.13	17.13	17.07			FPG2	30.64	30.15	29.64
	FPG3	19.03	18.79	18.7			FPG3	16.97	16.85	16.75			FPG3	29.27	28.87	28.84
	LA1	27.16	26.86	26.56			LA1	20.01	19.96	19.92			LA1	30.77	30.01	29.44
	LA2	24.26	24.01	23.93			LA2	20.11	20.01	19.96			LA2	30.07	29.4	29.13
	LA3	24.67	24.39	24.38			LA3	20.21	20.14	20.11			LA3	28	28	27.94
	LMP1	23.04	22.93	22.9			LMP1	17.45	17.39	17.29			LMP1	29.03	28.76	28.15
	LMP2	22.72	22.6	22.57			LMP2	17.09	17.04	16.95			LMP2	28.87	28.65	28.5
	LMP3	23.06	22.94	22.8			LMP3	16.97	16.94	16.89			LMP3	27.95	27.85	27.59
FAR19	MA1	NO CT	31.6	31.54		FAR20	MA1	NO CT	NO CT	NO CT		RPS4	MA1	15.32	15.29	15.25
	MA2	NO CT	30.81	30.43			MA2	NO CT	NO CT	NO CT			MA2	15.45	15.38	15.25
	MA3	NO CT	31.13	31.02			MA3	NO CT	NO CT	NO CT			MA3	15.4	15.28	15.27
	FA1	30.65	30.37	30.11			FA1	30.84	30.35	29.38			FA1	17.03	16.89	16.88
	FA2	30.86	30.41	29.62			FA2	30.73	30.37	30.55			FA2	17.06	17.02	17.02
	FA3	30.82	30.23	30.13			FA3	30.84	30.84	30.06			FA3	17.44	17.42	17.3
	MB1	27.61	27.58	27.5			MB1	28.92	28.81	28.61			MB1	16.65	16.46	16.42
	MB2	27.51	27.43	27.26			MB2	27.88	27.87	27.38			MB2	16.25	16.22	16.13
	MB3	28.44	28.4	27.82			MB3	28.98	28.6	28.25			MB3	16.58	16.56	16.37
	FB1	29.59	29.32	29.06			FB1	27.49	27.4	27.31			FB1	15.97	15.83	15.83
	FB2	28.92	28.28	27.87			FB2	29.09	28.84	28.73			FB2	16.36	16.34	16.22
	FB3	27.63	27.51	27.37			FB3	28.86	28.19	28.07			FB3	15.83	15.77	15.76
	FPG1	24.51	24.44	24.27			FPG1	31.08	30.38	30.25			FPG1	16.58	16.58	16.57
	FPG2	24.76	24.69	24.6			FPG2	30.27	30.17	29.15			FPG2	15.7	15.64	15.54
	FPG3	22.12	22.06	22.01			FPG3	28.42	28.29	28.01			FPG3	14.89	14.89	14.86
	LA1	29.66	29.5	29.18			LA1	NO CT	NO CT	NO CT			LA1	17.33	17.28	17.24
	LA2	27.41	27.18	27.16			LA2	NO CT	NO CT	NO CT			LA2	16.22	16.02	16.01
	LA3	28.93	28.73	28.54			LA3	NO CT	NO CT	NO CT			LA3	16.15	16.11	16.07
	LMP1	22.27	22.22	22.21			LMP1	31.06	30.71	NO CT			LMP1	15.62	15.6	15.47
	LMP2	22.29	21.9	21.65			LMP2	31.67	31.64	31.26			LMP2	15.54	15.27	15.25
	LMP3	21.82	21.69	21.63			LMP3	32.29	32.28	NO CT			LMP3	15.98	15.95	15.9
