# Supplementary material for: Transcriptome analysis identifies candidate genes in the biosynthetic pathway of sex pheromones from a zygaenid moth, Achelura yunnanensis (Lepidoptera: Zygaenidae)
Source: PeerJ. 2021 Dec 14;9:e12641. doi: 10.7717/peerj.12641 (PMC8679906; doi:10.7717/peerj.12641)
Supplement: Supplemental Information 8 [file peerj-09-12641-s008.xlsx]

## Sheet: Sheet1
Gene	Tissue	Biological replicate 1	Biological replicate 2	Biological replicate 3		Gene	Tissue	Biological replicate 1	Biological replicate 2	Biological replicate 3
ATF22	MA	0.0575103	0.133044	0.084786		ATF42	MA	0.019236	0.0150922	0.0117593
	FA	0.0813321	0.0927809	0.0525547			FA	0.0403849	0.0180726	0.0220964
	MB	0.014988	0.0211963	0.0281632			MB	0.128512	0.115021	0.0758855
	FB	0.0426876	0.0328027	0.0382065			FB	0.114227	0.0774801	0.125867
	FPG	0.0371617	0.0366501	0.0310332			FPG	0.0836187	0.133969	0.0454355
	LA	0.0127792	0.0105249	0.0166302			LA	0.00287929	0.00385229	0.0052624
	LMP	0.0493763	0.0361455	0.0722914			LMP	0.0097522	0.00349602	0.0102371
Gene	Tissue	Biological replicate 1	Biological replicate 2	Biological replicate 3		Gene	Tissue	Biological replicate 1	Biological replicate 2	Biological replicate 3
ATF54	MA	0.00127961	0.00131558	0.00119392		ATF58	MA	0.00306463	0.00206438	0.00349602
	FA	0.00168846	0.00289932	0.00291948			FA	0.00387909	0.00533586	0.00189962
	MB	0.00315079	0.00352034	0.0044869			MB	0.000676281	0.00104659	0.000936726
	FB	0.00398814	0.00298083	0.00410027			FB	0.000556978	0.00058467	0.00116935
	FPG	0.127624	0.110336	0.0683918			FPG	0.0204742	0.023847	0.0127792
	LA	0.000776844	0.000690491	0.000478202			LA	0.000553131	0.000809834	0.000498509
	LMP	0.00470997	0.003217	0.00442512			LMP	0.000821139	0.00105387	0.0013906
Gene	Tissue	Biological replicate 1	Biological replicate 2	Biological replicate 3		Gene	Tissue	Biological replicate 1	Biological replicate 2	Biological replicate 3
ALDH10	MA	0.469758	1.07923	1.05702		AR2	MA	0.0824675	0.0802124	0.0693465
	FA	0.920187	1.10957	0.510503			FA	0.107319	0.0476944	0.0679194
	MB	0.01038	0.0161755	0.014988			MB	0.0476944	0.0435846	0.0445004
	FB	0.0325761	0.0245175	0.0219437			FB	0.0376804	0.0339595	0.0423928
	FPG	0.00713901	0.0165153	0.0106718			FPG	0.166083	0.236512	0.0824675
	LA	0.002762	0.00302244	0.00349602			LA	0.0511176	0.0915035	0.063371
	LMP	0.00221255	0.002762	0.00227475			LMP	0.0902437	0.115821	0.173136
Gene	Tissue	Biological replicate 1	Biological replicate 2	Biological replicate 3		Gene	Tissue	Biological replicate 1	Biological replicate 2	Biological replicate 3
AR7	MA	0.159318	0.100132	0.178004		AOX2	MA	1	1.09429	0.535884
	FA	0.279319	0.366018	0.198881			FA	1.39475	1.53688	0.619851
	MB	0.167238	0.20306	0.0871697			MB	0.00728902	0.0052624	0.00661492
	FB	0.236512	0.264252	0.356009			FB	0.00501316	0.00379925	0.00421554
	FPG	0.0476944	0.0796583	0.0603696			FPG	0.0432835	0.0583132	0.0332606
	LA	0.0616381	0.0902437	0.0743238			LA	0.0185807	0.0217922	0.0233563
	LMP	0.257026	0.219149	0.260613			LMP	0.0220964	0.040106	0.0559377
Gene	Tissue	Biological replicate 1	Biological replicate 2	Biological replicate 3		Gene	Tissue	Biological replicate 1	Biological replicate 2	Biological replicate 3
AOX3	MA	0.138694	0.119906	0.128512		AOX4	MA	0.0500656	0.0451216	0.0514731
	FA	0.0435846	0.0629332	0.030606			FA	0.0769449	0.0660621	0.0319057
	MB	0.00439456	0.00458118	0.00587961			MB	0.00317271	0.0052624	0.00508314
	FB	0.00212242	0.00146989	0.00293979			FB	0.00968484	0.00754607	0.012174
	FPG	0.0017724	0.0020219	0.00179715			FPG	0.0193698	0.0227176	0.0293592
	LA	0.000635381	0.000375189	0.000446178			LA	0.00470997	0.00494414	0.00560114
	LMP	0.00820058	0.005839	0.00781218			LMP	0.00638959	0.00560114	0.00878917
Gene	Tissue	Biological replicate 1	Biological replicate 2	Biological replicate 3		Gene	Tissue	Biological replicate 1	Biological replicate 2	Biological replicate 3
AOX5	MA	0.0260957	0.0328027	0.0500656		AOX6.2	MA	0.000138601	0.000216486	0.000260439
	FA	0.0390093	0.0500656	0.0160637			FA	0.000130671	0.000128426	No data
	MB	0.002524	0.00287929	0.00374695			MB	0.000613738	0.00153231	0.000709904
	FB	0.0051541	0.00387909	0.00916241			FB	0.00187346	0.000842276	0.001219
	FPG	0.00439456	0.00188649	0.00323937			FPG	0.0475843	0.0412335	0.0417126
	LA	0.00733972	0.00643403	0.00770463			LA	0.000258043	0.000342068	8.75148e-05
	LMP	0.00848977	0.00680089	0.00982003			LMP	0.000214991	0.00027402	0.000365773
Gene	Tissue	Biological replicate 1	Biological replicate 2	Biological replicate 3		Gene	Tissue	Biological replicate 1	Biological replicate 2	Biological replicate 3
FAD4	MA	0.0059893	0.00520195	0.00617193		FAD5	MA	0.00140351	0.00163094	0.00171996
	FA	0.0491487	0.0504138	0.0619236			FA	0.00810639	0.0085291	0.00986552
	MB	0.0554231	0.0456459	0.0407599			MB	0.00217203	0.00263118	0.00485359
	FB	0.0284905	0.0778389	0.0437865			FB	0.0043743	0.0122587	0.00774031
	FPG	0.154961	0.286509	0.161169			FPG	0.00733972	0.00224863	0.00432405
	LA	0.000628083	0.000245821	0.000242437			LA	0.00152172	0.00248925	0.00146311
	LMP	0.00628708	0.00607291	0.00411926			LMP	0.00637484	0.00611515	0.00694379
Gene	Tissue	Biological replicate 1	Biological replicate 2	Biological replicate 3		Gene	Tissue	Biological replicate 1	Biological replicate 2	Biological replicate 3
FAD7	MA	0.00699209	0.00745939	0.00646383		FAD12	MA	0.0151271	0.0134767	0.014049
	FA	0.000507809	0.000441053	0.000579291			FA	0.0456459	0.0415203	0.0545339
	MB	0.000180785	0.000438006	0.000592831			MB	0.0184098	0.0256178	0.0406658
	FB	0.000124338	0.000449281	0.000289644			FB	0.0265825	0.0660621	0.0385612
	FPG	0.00858842	0.00758102	0.00408136			FPG	0.0497198	0.0450175	0.0312491
	LA	0.000352498	0.000490511	0.00015132			LA	0.026338	0.0257364	0.0177007
	LMP	0.000120381	0.000152725	9.27187e-05			LMP	0.0421973	0.0356479	0.0408542
Gene	Tissue	Biological replicate 1	Biological replicate 2	Biological replicate 3		Gene	Tissue	Biological replicate 1	Biological replicate 2	Biological replicate 3
FAR1	MA	0.000362408	0.000328892	0.000371737		FAR9	MA	6.11713e-05	4.8105e-05	4.66815e-05
	FA	0.00278121	0.00315808	0.00322444			FA	0.000219002	0.000205757	0.000171428
	MB	0.00132473	0.000852063	0.00273027			MB	0.0406658	0.031177	0.0414245
	FB	0.000546778	0.00163094	0.00112951			FB	0.0330309	0.0275836	0.0481372
	FPG	0.00157903	0.000846177	0.000746922			FPG	0.0741523	0.0912923	0.0764134
	LA	6.31824e-05	3.48103e-05	4.31547e-05			LA	0.0053854	0.00362768	0.00332276
	LMP	0.000185439	0.000164445	0.000324364			LMP	0.023847	0.0213931	0.0354835
Gene	Tissue	Biological replicate 1	Biological replicate 2	Biological replicate 3		Gene	Tissue	Biological replicate 1	Biological replicate 2	Biological replicate 3
FAR10	MA	0.00332276	0.00318005	0.00318005		FAR11	MA	0.0252068	0.0247451	0.0232486
	FA	0.0115173	0.0123012	0.0138236			FA	0.105353	0.104625	0.125287
	MB	0.00676953	0.00805039	0.00882988			MB	0.0513544	0.0383834	0.0552952
	FB	0.00594793	0.0140166	0.0112023			FB	0.0243481	0.0401987	0.0332606
	FPG	0.0301846	0.0286886	0.0642556			FPG	0.160056	0.357658	0.254073
	LA	0.00130952	0.00395145	0.00302244			LA	0.156039	0.0650022	0.0606492
	LMP	0.00594793	0.00644891	0.00786652			LMP	0.28453	0.313525	0.503475
Gene	Tissue	Biological replicate 1	Biological replicate 2	Biological replicate 3		Gene	Tissue	Biological replicate 1	Biological replicate 2	Biological replicate 3
FAR12	MA	0	0	0		FAR19	MA	1.25368e-05	2.54826e-05	1.80397e-05
	FA	0	0	0			FA	8.97675e-05	0.000101696	0.000121498
	MB	0.00393324	0.00470997	0.00251817			MB	0.00047053	0.000425046	0.0002971
	FB	0.000357419	0.000202456	0.000315494			FB	8.95603e-05	0.000235808	0.0002971
	FPG	6.15257e-05	4.2659e-05	5.64193e-05			FPG	0.00439456	0.0018778	0.00687991
	LA	0.000141187	8.93537e-05	0.000267143			LA	0.000217489	0.000434981	0.000158477
	LMP	0.00011521	9.77792e-05	0.000270247			LMP	0.00982003	0.010356	0.0183249
Gene	Tissue	Biological replicate 1	Biological replicate 2	Biological replicate 3
FAR20	MA	0	0	0
	FA	0.000102167	8.53186e-05	0.000106752
	MB	0.000202456	0.000342859	0.000226725
	FB	0.000339705	0.000163309	0.000162556
	FPG	6.13128e-05	5.17965e-05	9.51054e-05
	LA	0	0	0
	LMP	2.44163e-05	1.35614e-05	1.204e-05
