# Supplementary material for: Transcriptome analysis identifies candidate genes in the biosynthetic pathway of sex pheromones from a zygaenid moth, Achelura yunnanensis (Lepidoptera: Zygaenidae)
Source: PeerJ. 2021 Dec 14;9:e12641. doi: 10.7717/peerj.12641 (PMC8679906; doi:10.7717/peerj.12641)
Supplement: Supplemental Information 11 [file peerj-09-12641-s011.xlsx]

## Sheet: AyunACCs
Gene	Gene_id	FA	FH	FT	FAb	FL	FW	FPG		MA	MH	MT	MAb	ML	MW
ACC1	c56542_g0_i0	6.19	18.11	7.84	13.38	1.1	4.26	27.22		2.62	12.89	4.99	8.35	5.52	21.5
ACC2	c7554_g2_i3	8.53	9.62	7.89	11.29	5.07	9.33	9.88		7.67	6.33	5.06	6.82	4.3	6.99

## Sheet: AyunATFs
Gene	Gene_id	FA	FH	FT	FAb	FL	FW	FPG		MA	MH	MT	MAb	ML	MW
ATF1	c55256_g1_i2	1.14	29.49	0.51	0.05	11.31	1.34	0		4.43	31.22	2.13	0.87	26.6	8.9
ATF2	c73977_g0_i1	82.43	121.28	422.96	46.75	147.4	47.47	107.17		79.52	188.98	1724.69	111.65	555.98	22.71
ATF3	c79289_g3_i0	76.02	51.83	26.6	49.15	53.23	76.21	56.57		81.28	48.17	21.98	37.34	38.05	69.04
ATF4	c70904_g0_i2	34.11	28.7	25.18	153.46	31.49	27.41	32.34		38.2	39.89	26.36	23.72	24.71	31.54
ATF5	c33108_g0_i0	172.87	251.34	135.04	140.09	189.3	63.98	180.08		152.53	218.65	165.34	81.02	234.71	41.28
ATF6	c68659_g1_i0	49.48	66.09	56.95	42.37	17.05	17.96	23.69		41.77	53.22	133.01	31.75	38.29	11.78
ATF7	c67931_g0_i1	29.33	19.71	31.75	83.25	32.71	19.93	37.22		24.77	20.54	26.77	22.97	24.87	22.82
ATF8	c61249_g0_i1	8.64	15.15	6.72	24.3	8.6	6.85	12.74		8.25	15.62	5.5	7.89	6.57	3.79
ATF9	c61929_g0_i0	45.48	24.11	12.58	22.5	31.02	21.33	41.78		53.42	26.95	12.3	63.34	21.6	29.69
ATF10	c71529_g1_i0	11.71	66.18	10.58	1.62	2.2	0.58	0		16.95	89.86	0.5	0.17	1.08	0.36
ATF11	c60987_g1_i1	3.17	20.09	8.7	27.51	2.88	4.86	5.22		4.32	18.45	8.9	16.19	7.55	12.1
ATF12	c75455_g1_i1	78.52	27.48	36.59	44.04	90.67	24.84	187.92		65.6	28.54	37.66	13.06	75	12.54
ATF13	c32953_g0_i0	12.11	8.96	9.66	65.05	11.39	7.56	11.7		12.79	12.19	8.64	13.08	9.6	7.56
ATF14	c62900_g4_i1	16.12	22.07	18.92	22.62	15.61	76.29	51.06		14.35	18.85	19.78	103.56	16.08	56.73
ATF15	c75329_g0_i1	1.05	1.63	1.02	27.19	1.12	1.49	4.54		0.77	1.88	1.52	7.28	0.53	0.78
ATF16	c81787_g1_i0	43.75	58.12	15.11	36.95	31.5	25.62	32.7		41.17	54.23	16.41	27.4	27.35	28.63
ATF17	c44779_g0_i1	25.69	8.65	4.99	18.93	7.51	9.61	13.65		20.58	8.38	4.38	18.73	3.95	7.38
ATF18	c22230_g3_i2	21.45	17.4	18.73	48.05	36.05	68.39	30.44		19.02	27.79	17.15	17.82	28.19	76.42
ATF19	c76559_g1_i0	14.52	8.25	4.92	0.07	6.6	4.67	4.29		18.85	5.03	4.28	5.3	5.21	5.04
ATF20	c79590_g0_i0	59.63	59.18	21.37	17.82	38.72	69.6	65.7		36.76	48.47	15.46	14.32	31.86	39.04
ATF21	c68421_g0_i0	6.1	18.46	70.29	4.35	16.44	0.91	4.57		17.93	21.39	26.4	2.9	18.61	2.94
ATF22	c81389_g0_i1	26.62	36.85	31.55	145.52	37.29	3.12	39.75		9.37	42.14	12.92	25.79	16.83	5.18
ATF23	c74234_g0_i0	15.36	11.31	9.61	23.5	14.48	16.15	17.89		12.12	13.19	7.73	25.47	11.14	13.86
ATF24	c52678_g2_i4	5.95	3.15	0.09	0.05	0.32	0.05	0.29		2.24	5.43	0.07	1.29	0.44	0.04
ATF25	c63518_g7_i1	0.07	0.21	0	0.09	0	0	0		0.09	0	0	1.01	0	0
ATF26	c81855_g0_i4	16.5	13.1	6.62	28.12	11.13	12.12	17.97		13.57	12.92	5.78	6.02	9.42	10.91
ATF27	c79342_g2_i0	0.74	0.57	1.2	13.46	0.17	0.17	1.68		0.91	0.8	1.27	22.01	0.23	0.07
ATF28	c65660_g0_i3	13.56	17.38	17.85	11.07	13.6	17.23	10.26		9.21	14.88	21.15	7.69	13.57	23.75
ATF29	c66877_g3_i0	5.37	8.83	4.59	6.17	4.13	10.65	10.39		6.37	9.85	2.12	2.77	1.94	7.33
ATF30	c60648_g1_i0	33.62	28.55	31.76	104.21	31.68	33.93	27.49		34.58	35.06	28.03	42.88	24.92	44.66
ATF31	c71068_g0_i0	17.42	15.26	12.84	13.19	21.11	20.57	23.11		15.01	16.22	9.83	10.59	20.65	11.48
ATF32	c76798_g2_i1	19.92	7.73	4.31	37.58	3.89	3.26	22.84		17.14	7.01	4.61	42.16	5.79	5.3
ATF33	c73273_g2_i1	11.09	6.78	10.12	75.29	12.74	15.56	12.08		10.26	10.91	9.56	10.16	10.63	11.99
ATF34	c82395_g0_i4	0.64	4.11	1.05	20.16	0.76	1.12	2.37		0.43	3.58	1.15	3.79	1.06	0.58
ATF35	c72193_g2_i0	0.13	33.29	0	0.06	0	0	0.07		0.27	36.4	0.04	0	0.05	0.05
ATF36	c80650_g3_i0	50.62	162.79	1749.11	56.14	240.54	35.42	73.26		34.9	249.95	1714.27	44.29	521.89	15.84
ATF37	c49370_g3_i0	9.4	7.38	3.87	28.95	5.38	7.23	6.99		9.78	9.68	5.39	9.75	5.85	6.67
ATF38	c81144_g2_i0	3.62	3.59	1.92	12.67	3.78	1.96	3.92		4.13	3.78	1.25	1.21	2.5	1.26
ATF42	c70816_g0_i1	6.87	7.26	48.23	5.4	35.94	4.37	31.44		5.84	16.18	38.01	7.28	43.5	10.42
ATF43	c54920_g0_i2	0.44	0.44	0.2	0.39	0.38	0.13	0.6		0.52	0.16	0.15	0.28	0.06	0.17
ATF44	c36688_g0_i0	17.04	10.48	8.81	13.64	13.54	9.86	29.65		15.61	10.91	6.47	31.45	6.99	13.45
ATF45	c53952_g1_i0	2.24	3.82	7.3	7.36	5.38	11.58	7.67		1.44	3.35	4.98	3.87	3.8	24.36
ATF46	c48826_g0_i0	7.01	3.58	4.86	5.35	5.84	5.21	5.5		6.6	5.47	4.09	4.23	4.16	5.87
ATF47	c66625_g1_i0	2.65	0.79	0.07	18.13	0.11	0.1	1.52		2.51	0.6	0.02	0.14	0.03	0.15
ATF48	c66625_g0_i0	0.26	1.65	1.84	3.16	0.36	0.09	0.37		0.53	1.8	0.41	0.42	0.23	0.06
ATF49	c77675_g0_i4	14.23	11.68	6.7	6.15	48.04	0.89	37.49		8.08	8.89	15.46	58.03	23.43	6.32
ATF50	c78176_g1_i1	6.81	6.76	5.54	31.9	8.16	7.63	5.93		8.07	11.12	6.76	6.63	6.92	7.53
ATF51	c70816_g0_i1	6.87	7.26	48.23	5.4	35.94	4.37	31.44		5.84	16.18	38.01	7.28	43.5	10.42
ATF52	c84283_g0_i1	13.01	31.15	107.83	37.33	36.65	11.64	19.85		14.67	54.67	204.34	18.8	76.09	9.55
ATF54	c59140_g3_i1	0.31	0.24	0.48	4.77	1.88	0.13	55.24		0.07	0.62	0.29	0.91	2.12	1.09
ATF55	c4420_g0_i3	8.53	0.34	0.12	0.36	0.29	0.37	0.88		7.66	0.19	0.09	0.11	0.08	0.25
ATF56	c71010_g1_i3	8.7	9.66	8.72	15.03	10.03	4.12	5.65		8.92	11.25	5.35	6.48	5.51	3.14
ATF57	c26780_g3_i0	0	6.33	0	6.23	0	0	0		0	7.71	0	0	0	0
ATF58	c52238_g0_i0	1.1	3.74	1.74	1.06	0.37	1.91	16.92		0.62	2.62	1.06	0.49	0.39	1.78
ATF59	c65181_g1_i0	3.16	5.61	0.18	1.79	0.19	2.38	3.61		3.18	4.58	0.17	0.67	0.43	1.15
ATF60	c70816_g0_i1	6.87	7.26	48.23	5.4	35.94	4.37	31.44		5.84	16.18	38.01	7.28	43.5	10.42

## Sheet: AyunALDHs
Gene	Gene_id	FA	FH	FT	FAb	FL	FW	FPG		MA	MH	MT	MAb	ML	MW
ALHD1	c79043_g1_i3	281.71	238.18	23.69	29.21	21.29	358.82	61.8		426.95	193.87	12.93	71.61	15.17	116.4
ALHD2	c58348_g0_i0	2.6	1.66	3.61	31.42	3.25	0.84	6.35		2.27	2.62	2.94	4.27	1.61	1.11
ALHD3	c80220_g0_i1	42.9	45.1	94.64	43.99	63.21	32.3	42.55		43.86	40.8	79.51	25.3	72.53	25.52
ALHD4	c22152_g4_i2	103.47	83.73	19.43	30.47	29.54	34.49	37.7		108.04	74.62	13.75	61.4	18.07	59.53
ALHD5	c80912_g0_i1	13.41	21.4	7.33	14.2	8.52	6.25	9.59		14	27.52	3.98	5.63	6.79	9.86
ALHD6	c81390_g2_i0	9.54	12.67	3.28	20.78	3.59	5.98	8.4		8.08	12.82	4.33	9.49	3.85	3.31
ALHD7	c83148_g2_i0	115.14	24.99	15.61	7.93	30.43	123.27	11.76		91.82	13.77	5.43	2.94	21.6	52.95
ALHD8	c60884_g1_i0	301.46	117.3	81.08	36.19	119.88	171.9	180.99		408.74	92.53	39.24	27.29	59.22	73.3
ALHD9	c79327_g1_i2	2.49	1.67	7.58	14.71	2.24	2.43	2.21		2.1	3.57	3.45	1.11	1.28	1.85
ALHD10	c35888_g1019_i1	174.54	25.16	6.27	14.43	4.39	2.59	4.07		376.47	13.74	3.55	19.21	4.7	2.53
ALHD11	c56148_g0_i0	8.15	20.49	6.6	5.58	6.96	12.02	14.4		5.17	23.37	3.99	3.5	6.97	16.8
ALDH13	c7375_g0_i0	0	0	0	0	0.36	0.22	0.13		0	0	0	0.15	0.56	0.27

## Sheet: AyunAOs
Gene	Gene_id	FA	FH	FT	FAb	FL	FW	FPG		MA	MH	MT	MAb	ML	MW
AO1	c77146_g2_i3	0.11	0.16	0	0.48	0	0	0.72		0.94	0.64	0.26	0.14	0.09	0
AO2	c82472_g1_i0	16.45	7.51	6.54	16.11	14.63	392.98	13.23		33.22	27	19.16	24.76	23.48	498.61
AO3	c47768_g0_i0	15.32	15.31	11.65	0.56	6.87	0.05	2.58		23.06	18.14	10.08	7.56	6.78	0.12
AO4	c68758_g1_i0	53.97	27.28	3.36	204.42	10.35	3.29	67.54		44.95	34.11	6.59	15.87	59.69	19.08
AO5	c49382_g0_i2	25.1	8.58	1.91	3.54	3.9	2.64	5.87		11.64	6.97	11.49	12.22	10.89	3.75
AO6	c64447_g0_i1	0.08	0.05	0.06	0.18	0.05	0	0.11		0.31	0.04	0.09	0.23	0	0
AO7	c54616_g4_i0	5.06	21.29	45.74	54.45	90.49	2.04	45.18		2.85	11.61	18.55	25.28	20.87	0.79
AO8	c71040_g0_i0	61.53	78.46	33.63	21.89	27.59	16.9	47.17		38.46	63	31.68	102.12	18.12	8.77
AO10	c70707_g1_i0	3.56	5.59	5.33	44	4.7	5.98	5.01		5.76	5.66	5.09	6.56	5.26	5.81
AO11	c33213_g1_i2	51.16	88.3	16.49	161.95	23.87	9.98	49.67		72.74	67.06	9.06	75.03	19.11	16.57
AO12	c45538_g0_i1	7.41	6.17	1.98	6.64	1.47	0.75	7.96		4.37	4.15	1.81	6.37	1.04	0.19
AO13	c48755_g0_i0	0.21	0.7	0.73	2.17	0	0.11	2.54		0.21	1.77	2.54	41.51	0.09	0.14
AO14	c74711_g0_i0	15.25	17.52	16.96	63.87	17.69	12.1	13.39		12.32	19.46	13.64	11.99	9.86	5.56
AO15	c44700_g0_i0	0.14	0.42	0	0.45	0	0	0		0.36	0	0	0.18	0	0
AO16	c28110_g0_i0	0	0.42	0.65	3.81	0.02	7.94	3.97		0.07	1.92	6.44	84.9	0.03	1.31
AO17	c70182_g4_i0	15.65	16.51	67.06	9.91	41.99	7.93	18		16.51	40.73	71.65	11.65	54.67	5.25
AO18	c26119_g0_i0	0	0	0	0.05	0	0	0		0	0	0	0.57	0	0
AO19	c62881_g0_i0	0.32	1.73	0	28.42	0.15	2.31	0.57		0	1.53	0.3	361.87	0	0.17
AO20	c27187_g0_i0	0	0.06	0.86	4.7	0.06	451.6	7.57		0	0.98	4.54	39.8	0.07	31.94
AO21	c69622_g0_i2	30.57	28.54	4.36	1.19	12.71	1.34	13.74		28.85	28.54	4.08	5.03	12.16	3.01
AO22	c82947_g1_i1	8.13	8.54	11.67	29.89	5.17	42.99	3.87		8.52	7.59	38.97	6.63	5.41	33.45
AO23	c81556_g1_i2	17.51	2.19	1.71	2.12	5.66	19.44	5.24		16.69	2.13	0.92	4.02	5.63	6
AO24	c39928_g0_i0	20.11	21.46	8.3	45.1	13.37	12.37	17.99		17.56	19.31	6.44	15.82	9.63	9.36
AO25	c29274_g1_i0	6.22	11.59	2.41	48.9	1.5	1.98	2.7		4.96	10.75	1.72	7.32	1.65	1.93
AO26	c72223_g1_i1	70.28	48.62	25.93	1.15	58.55	190.28	51.63		85.03	53.72	29.44	20.43	56.85	499.85
AO27	c77195_g2_i4	13.78	5.83	3.46	25	7.37	8.8	11.91		16.9	9.68	4.48	5.95	6.06	11.62
AO28	c23084_g2_i0	10.79	6.59	6.19	35.71	6.22	3.75	6.27		15.78	7.28	4	9.11	5.87	5.05
AO29	c44540_g0_i3	10.6	9.75	5.63	57.85	6.5	7.34	7.15		11.6	11.85	4.36	10.38	3.78	5.58
AO30	c84001_g0_i1	28.84	39.31	20.27	25.11	27.68	31.99	20.53		19.34	36.58	12.95	13.45	19.54	24.55
AO32	c82472_g1_i0	16.45	7.51	6.54	16.11	14.63	392.98	13.23		33.22	27	19.16	24.76	23.48	498.61
AO34	c83925_g1_i1	3.28	3.66	1.4	0.98	0.88	0.72	1.62		1.12	2.7	0.72	7.05	0.68	0.65

## Sheet: AyunARs
Gene	Gene_id	FA	FH	FT	FAb	FL	FW	FPG		MA	MH	MT	MAb	ML	MW
AR1	c74574_g2_i0	0.51	0.35	0.88	0.65	0.82	0.42	1.64		0	0.67	0.32	2.43	0.34	0.17
AR2	c79614_g4_i0	21.86	15.83	5.07	1.81	39.66	19.99	77.03		8.64	10.08	8.9	17.16	39.96	29.27
AR3	c53426_g0_i0	0.04	0	0	1.47	0.11	0.03	0.05		0	0.14	0.05	7.24	0	0.13
AR4	c52037_g0_i0	23.01	13.04	3.94	29.19	8.6	38.05	22.47		25.55	16.34	12.89	37.28	22.33	199.18
AR5	c75483_g1_i0	33.61	20.84	12.31	0.21	9.53	128.5	2.94		11.77	13.2	7.54	0.09	9.17	102.86
AR6	c72559_g1_i0	25.48	30.5	17.7	37.6	19.42	18.19	19.03		25.57	22.54	8.83	72.83	10.86	11.32
AR7	c77482_g1_i1	98.45	107.5	119.62	28.56	189.72	1762.78	35.68		30.63	74.84	81.67	48.9	150.75	461.56
AR8	c75383_g1_i1	0.18	1.4	0.08	0.07	0.68	0	1.19		0.09	0.86	0.17	3.65	0.88	0.27
AR9	c74104_g2_i1	9.26	9.76	4.52	45.65	5.02	4.5	7.86		10.7	13.81	3.75	5.41	4.69	3.28
AR10	c19767_g0_i1	0.06	0.1	0.09	2.28	0.02	0	0.21		0.03	0.04	0.07	2.45	0.04	0
AR11	c18836_g0_i0	0	0	0	0.8	0.59	0	0		0	0	0	0	0	0
AR12	c24416_g0_i0	0	0	0	0	0	1.37	0		0	0	0	0	0	0

## Sheet: AyunAOXs and XDHs
Gene	Gene_id	FA	FH	FT	FAb	FL	FW	FPG		MA	MH	MT	MAb	ML	MW
XDH1	c65096_g0_i1	8.44	7.65	5.9	41.81	5.29	8.68	19.24		13.05	6.8	5.26	18.82	4.49	44.47
XDH2	c49065_g0_i1	16.07	7.57	7.91	0.97	10.29	69.27	7.32		9.64	6.7	3.07	3.29	5.21	25.05
AOX2	c81900_g0_i0	200.03	5.07	1.16	0	4.8	0.93	12.86		264.98	3.78	0.67	0.6	11.02	0.49
AOX3	c74090_g1_i3	9.83	1.67	0.98	0.52	0.68	0.34	1.17		38.91	1.91	2.07	1.41	1.19	0.33
AOX4	c74625_g2_i1	14.36	5.55	4.21	1.33	1.07	1.6	9.34		10.32	4.33	1.3	8.26	0.95	1.89
AOX5	c55112_g2_i0	0.83	0.15	0.06	0.12	0.17	0.79	0.23		1.09	0.23	0.09	0.54	0.26	0.53
AOX6.1	c69005_g1_i3	0.56	0	0.06	0	0.02	0.07	0.21		0.12	0.06	0	1.93	0.07	0.08
AOX6.2	c27739_g0_i1	0	0.01	0.41	14.61	0	0.01	8.13		0.42	0.13	0.45	2.04	0	0.02

## Sheet: AyunFADs
Gene	Gene_id	FA	FH	FT	FAb	FL	FW	FPG		MA	MH	MT	MAb	ML	MW
FAD1	c35888_g140_i1	24.3	18.61	0.91	2.23	14.04	6.84	14.01		12.79	29.49	11.04	8.69	19.71	7.19
FAD2	c61673_g0_i0	0.5	1.12	0.03	0.03	0.25	0.14	4.01		2.87	0.91	0.12	0.03	0.11	0.14
FAD3	c58733_g1_i0	43.12	12.03	8.85	40.61	15.59	17.44	10.27		25.84	6.69	7.89	9.72	9.71	33.39
FAD4	c81059_g1_i0	44.57	23.33	3.02	1.7	162.18	71.49	170.86		24.24	26.81	5.66	3.18	140.79	98.7
FAD5	c50504_g0_i0	5.17	9.54	3.43	34.02	5.54	3.18	15.37		2.84	5.71	2.38	4.15	3.33	3.32
FAD6	c71381_g0_i0	4.54	0.09	0	0.03	0	1.52	0.06		0.39	0	0	0	0	0.9
FAD7	c57146_g0_i0	0.18	6.23	4.02	13.34	0.28	0.23	38.53		1.22	0.59	3.16	11.26	0.08	0.1
FAD8	c73829_g0_i3	54.37	2.76	1.03	1.68	11.77	251.61	4.58		66.65	2.79	0.73	1.05	6.74	75.34
FAD9	c80394_g0_i1	25.6	34.44	12.06	61.78	14.6	31.76	23.83		43.09	33.17	22.86	63.73	13.51	70.26
FAD10	c22028_g0_i0	0	0.07	0.55	30.09	0.4	0	0.04		0	0	0	0.99	0.16	0.04
FAD11	c66941_g1_i1	10.74	3.99	4.12	0.51	12.78	4.86	10.13		10.14	9.03	2.87	16.42	13.83	4.26
FAD12	c62700_g1_i0	13.82	23.4	27.16	23.35	22.29	4.16	48.67		17.3	24.33	23.3	19.92	24.94	12.69
FAD13	c22291_g1_i1	0	0	0	0	0	0	0		0	0	0	1.92	0.16	0.08
FAD14	c56635_g1_i1	0.95	0.86	0.74	2.7	0.45	0.42	1.04		0.5	1.36	1.05	2.23	0.61	0.38
FAD15	c28758_g1_i6	0.19	1.8	0.52	2.02	0.12	0.38	0.64		0.08	0.97	0.54	2.99	0.21	0.34
FAD16	c66755_g2_i1	0	0	0	0	0	0.06	0		0	0	0	7.15	0	0
FAD17	c66755_g2_i1	0	0	0	0	0	0.06	0		0	0	0	7.15	0	0
FAD18	c41607_g0_i0	1.32	0.91	0	0	0	0	0		0.76	0.42	0	0.2	0.17	0
FAD19	c50778_g2_i0	2.3	3.62	3.02	4.85	4.26	2.77	2.78		2.79	3.26	2.55	7.6	3.19	3.25
FAD20	c6734_g0_i0	0	0	0	0	0	0.26	0		0.18	0	0	0	0	0
FAD21	c59771_g0_i0	0.13	0.13	0.97	0.69	0	0	0.41		0.33	0.34	0.51	0	1.03	0
FAD22	c17389_g0_i0	0	2.68	3.06	3.77	0	0	28.67		1.41	0.5	1.16	5.59	0	0

## Sheet: AyunFARs
Gene	Gene_id	FA	FH	FT	FAb	FL	FW	FPG		MA	MH	MT	MAb	ML	MW
FAR1	c55463_g6_i0	8.99	30.19	1.89	0.12	0.96	5.81	3.65		6.3	17.96	1.26	1.45	1.22	9.96
FAR2	c32839_g3_i0	53.09	21.4	12.72	23.69	12.94	9.79	68.31		55.51	15.76	11.93	55.34	9.2	17.21
FAR3	c79046_g2_i1	1.55	1.72	0.6	3.09	0.58	1.34	0.32		0.59	1.32	0.27	0.77	0.31	0.75
FAR4	c81922_g2_i1	133.69	18.77	12.58	13.17	5.78	7.73	33.17		114.65	16.95	13.83	18.55	9.25	14.04
FAR5	c81339_g0_i3	169.46	50.76	34.33	28.13	48.3	39.07	60.03		171.26	38.98	27.73	36.47	46.29	66.35
FAR6	c72802_g0_i3	14.88	18.22	2.03	48.67	20.12	19.41	18.67		18.07	15.89	1.16	3	16.44	17.1
FAR7	c56780_g2_i1	158.88	10.21	14.49	13.06	30.3	88.06	26.45		122.6	14.13	12.08	4.82	43.07	32.11
FAR8	c83996_g2_i0	91.7	30.12	13.51	2.28	64.63	19.27	57.52		82.75	32.19	15	5.84	74.91	54.96
FAR9	c28033_g1_i0	0	13.1	1.75	3.6	0.11	22.21	20.36		0.08	10.88	2.66	4.51	0.25	50.73
FAR10	c81147_g0_i5	9.49	17.34	19.24	12.13	6.01	7.47	66.7		9.17	16.32	10.47	7.51	9.58	6
FAR11	c35888_g1416_i0	46.97	16.74	27.05	9.37	49.9	34.43	116.81		50.44	27.15	32.25	15.04	43.58	53.31
FAR12	c28502_g4_i2	0	0	0.03	1.62	0	0	0		0	0	0	20.41	0	0
FAR13	c47603_g1_i0	0	0	0	0	0.07	0.05	0		0	0	0	7.5	0	0.51
FAR14	c42515_g0_i1	46.21	0.6	0.27	0.07	0.39	0.51	0.14		74.15	0.63	0.42	0.51	0.36	6.89
FAR15	c75485_g1_i0	2.73	4.74	3.59	0.35	4.22	0.17	6.31		1.46	4.53	0.84	0.77	3.86	0.15
FAR16	c35888_g918_i2	220.12	35.02	21.65	6.29	72.86	47.16	25.62		198.67	25.66	18.78	8.91	51.42	99.07
FAR17	c49264_g0_i0	0.18	0	0	1.22	0	3.82	0.37		0	0	0	0	0	0.2
FAR18	c79467_g0_i0	0	0	0	2.51	0	0	0.09		0.48	0.16	0	0.15	0.05	0
FAR19	c28502_g2_i0	0	0.17	0.07	0.15	0	0.21	2.62		0	0.13	0.03	4.74	0	0.09
FAR20-p	c54689_g0_i0	0.06	0.44	0.06	0.93	0	0.15	0.17		0	0	0	0.82	0	0.12
FAR21-p	c18327_g1_i1	0	0	0	0	0	0	0.05		0	0.07	0	47.3	0	0
FAR22-p	c4027_g0_i0	0	0	0	0	0	0	0		0	0	0	0.68	0	0
FAR24-p	c55178_g0_i0	0.68	0.62	0	0	1.34	0	0		6.75	0	0	1.73	0	0

## Sheet: AyunFAS
Gene	Gene_id	FA	FH	FT	FAb	FL	FW	FPG		MA	MH	MT	MAb	ML	MW
FAS1	c69369_g0_i3	0.64	1.67	1.63	8.56	1.26	1.24	0.84		0.11	0.92	0.18	4.95	0.2	0.78
FAS2	c76477_g2_i2	0.27	23.49	0.76	8.61	0.04	0.15	0.31		0.18	7.36	0.98	9.34	0.02	0.07
FAS3	c30073_g0_i0	0.37	2.93	0.83	3.15	0.6	0.85	0.7		0	0.95	0.16	3.66	0.03	0.47
FAS4	c55156_g0_i0	0.75	0.26	0.24	3.49	0.79	0.49	0.03		0.72	0.26	0.12	0.56	0.83	0.11
FAS5	c74049_g2_i1	0.43	0.08	0	0.2	0	0	0.05		1.01	0.12	0.02	0.47	0	0.08
FAS6	c57010_g0_i0	0.47	0.1	0	0.22	0	0	0.05		0.26	0	0.05	0.38	0	0
FAS7	c74994_g1_i1	0.23	0	0	0.46	0	0	0		0	0	0.09	0.06	0	0
FAS8	c73877_g0_i0	0	1.42	0.21	0.43	0.39	0.96	0.14		0.43	1.32	0.26	0.67	1.28	1.42
FAS9	c20414_g0_i0	0	0.13	0.14	0.7	0	0.04	0		0	0.4	0.04	0.6	0.05	0
FAS10	c21891_g0_i0	0	0	0	0.29	0	0	0		0	0.71	0	0.52	0	0
FAS11	c61377_g0_i1	0.18	0	0	0	0	0	0		0	0	0	0.11	0	0

## Sheet: AyunFATPs
Gene	Gene_id	FA	FH	FT	FAb	FL	FW	FPG		MA	MH	MT	MAb	ML	MW
FATP1	c65631_g2_i1	74.36	326.77	25.24	11.66	28.6	30.49	16.46		62.31	298.1	15.82	16.05	23.45	17.69
FATP2	c7952_g1_i1	2.35	1.29	1.13	9.45	3.23	1.2	6.02		2.6	1.92	2.31	7	1.77	2.26
FATP3	c40703_g0_i0	6.85	5.21	3.36	9.15	3.69	11.01	10.5		4.88	6.21	2.18	3.73	4.03	18.82
FATP4	c51278_g1_i0	139.36	95.22	25.11	73.09	9.28	25.94	25.97		176.75	89.99	19.47	30.14	10.18	30.64
